# Supplementary material for: Synthesis and Antimicrobial Properties of a Ciprofloxacin and PAMAM-dendrimer Conjugate
Source: Molecules. 2020 Mar 18;25(6):1389. doi: 10.3390/molecules25061389 (PMC7146445; doi:10.3390/molecules25061389)
Supplement: Supplementary file 1 [file molecules-25-01389-s001.pdf]

# Supplementary material for:

## Synthesis and Antimicrobial Properties of a Ciprofloxacin and PAMAM-dendrimer Conjugate.

Søren Wedel Svenningsen,<sup>1</sup> Rikki Franklin Frederiksen,<sup>2</sup> Claire Counil,<sup>1</sup> Mario Ficker,<sup>1</sup> Jørgen J. Leisner,<sup>2</sup> and Jørn B. Christensen<sup>1\*</sup>

<sup>1</sup> Department of Chemistry, University of Copenhagen, Thorvaldsensvej 40, DK-1871 Frederiksberg C, Denmark; [swsvenningsen@gmail.com](mailto:swsvenningsen@gmail.com) (SWS); [claire.counil@orange.fr](mailto:claire.counil@orange.fr) (CC); [mario.ficker@gmail.com](mailto:mario.ficker@gmail.com) (MF); [jbc@chem.ku.dk](mailto:jbc@chem.ku.dk) (JBC)

<sup>2</sup> Department of Veterinary and Animal Sciences, Food Safety and Zoonoses, University of Copenhagen, Grønnegårdsvej 15, DK-1870 Frederiksberg C, Denmark; [rikki.fredriksen@ki.se](mailto:rikki.fredriksen@ki.se) (RFF); [jjl@sund.ku.dk](mailto:jjl@sund.ku.dk) (JL)

\* Correspondence: [jbc@chem.ku.dk](mailto:jbc@chem.ku.dk); Tel.: +45-3533-2452

Table of content:

S1. Optical Densities at 600 nm versus well number for the strains 4/74 and PAO1.

|           |                               |
|-----------|-------------------------------|
| S2 – S5   | NMR-spectra of compound 2     |
| S6 – S9   | NMR-spectra of compound 3     |
| S10 – S14 | ESI-MS spectra of compound 3  |
| S15 – S19 | NMR-spectra of compound 4     |
| S20 – S22 | ESI-MS spectra of compound 4  |
| S23 – S26 | NMR-spectra of compound 5     |
| S27 – S28 | ESI-MS spectra of compound 5  |
| S29 – S32 | NMR-spectra of compound 7     |
| S33 – S34 | ESI-MS spectra of compound 7  |
| S35 – S39 | NMR-spectra of compound 8     |
| S40       | ESI-MS spectrum of compound 8 |
| S41 – S45 | NMR-spectra of compound 9     |
| S46 – S49 | ESI-MS spectra of compound 9  |
| S50 – S54 | NMR-spectra of compound 10    |
| S55 – S57 | ESI-MS spectra of compound 10 |

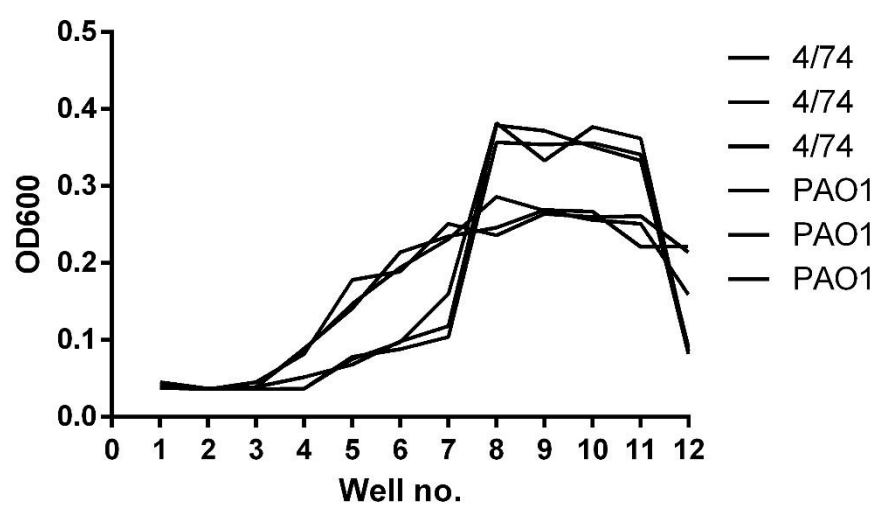

Figure S1: Optical Densities at 600 nm versus well number for the strains 4/74 and PAO1.

Figure S2:  $^1\text{H}$ -NMR (500 MHz in  $\text{DMSO-}d_6$ ) of DAB-PAMAM-GO- $(\text{NH}_2)_4$  (**2**)

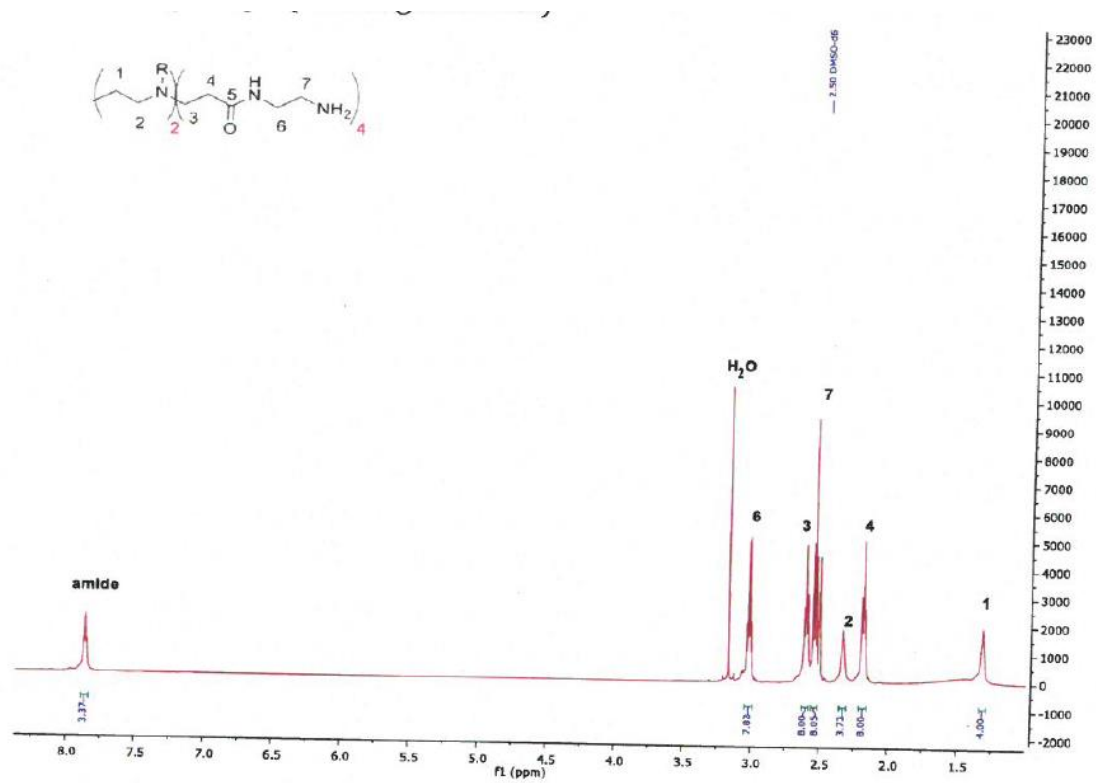

Figure S3: COSY-NMR (500 MHz in DMSO-D<sub>6</sub>) of DAB-PAMAM-G0-(NH<sub>2</sub>)<sub>4</sub> (**2**)

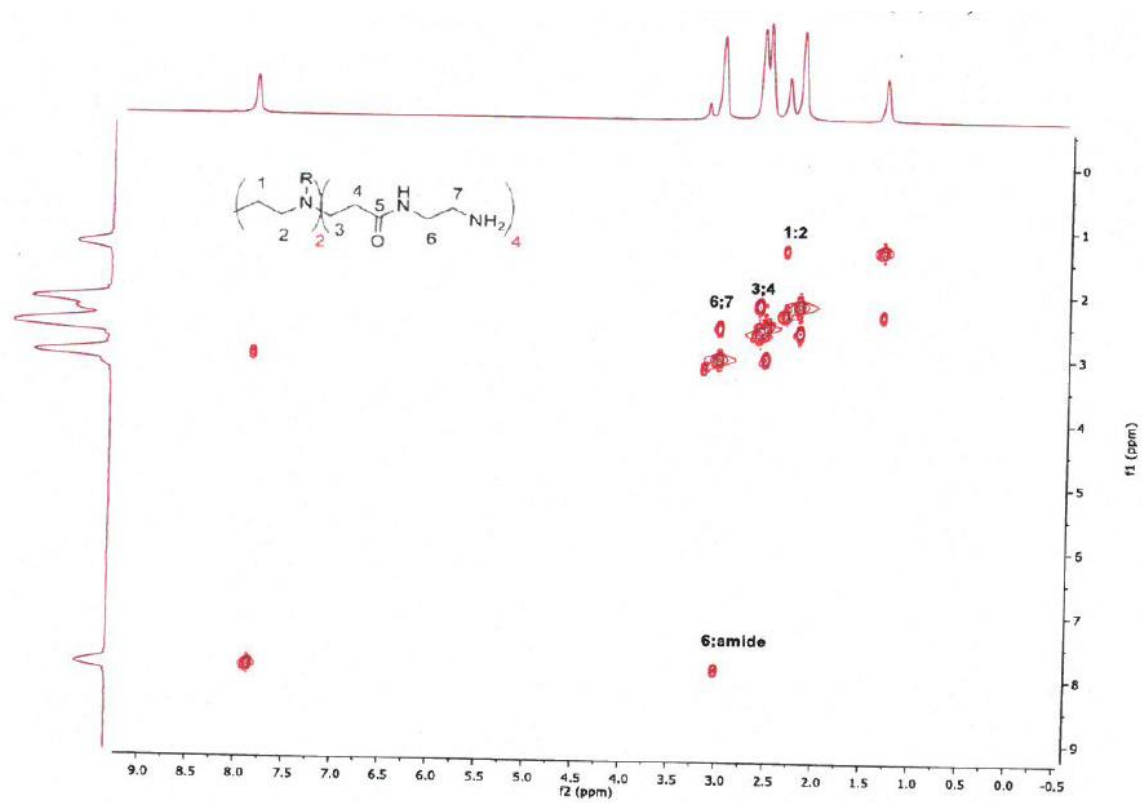

Figure S4:  $^{13}\text{C}$ -NMR (125 MHz in  $\text{DMSO-}D_6$ ) of DAB-PAMAM-GO- $(\text{NH}_2)_4$  (**2**)

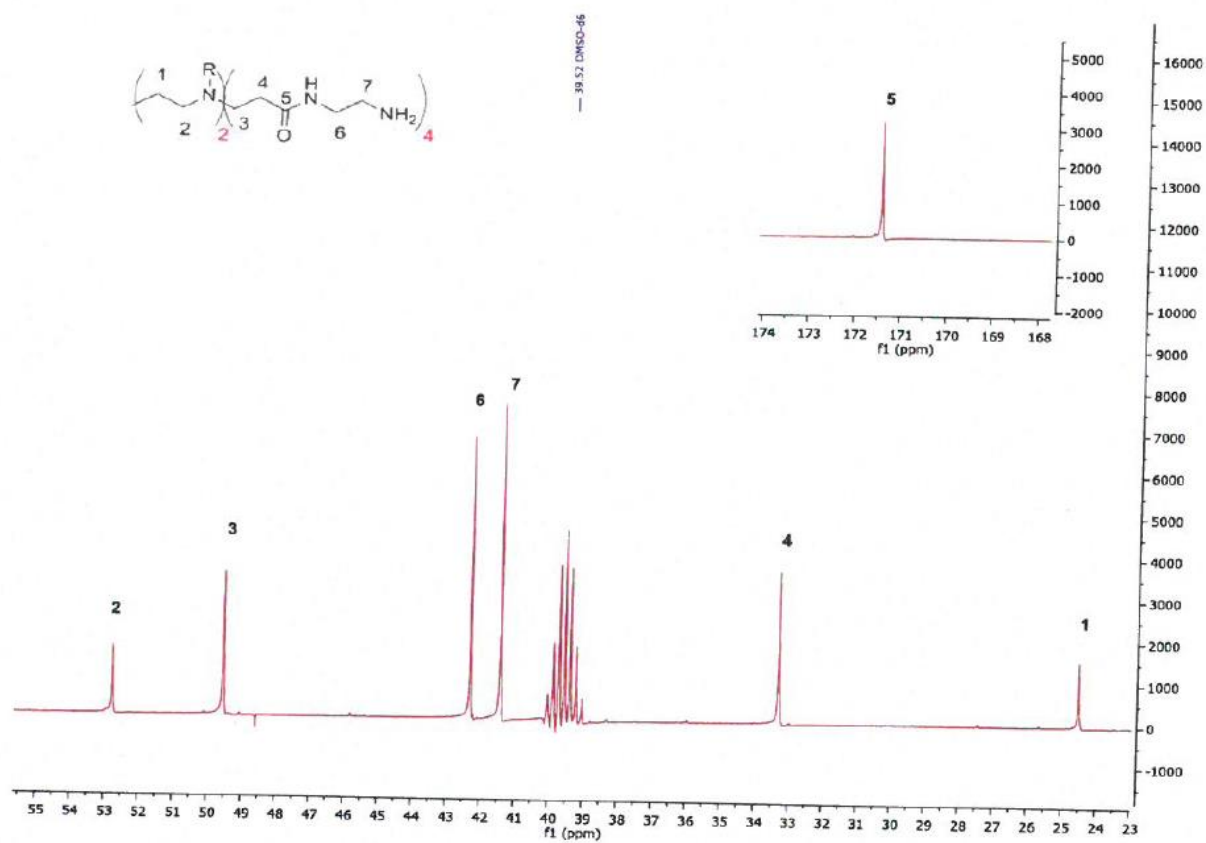

Figure S5: HSQC-NMR (125 & 500 MHz in DMSO-D<sub>6</sub>) of DAB-PAMAM-GO-(NH<sub>2</sub>)<sub>4</sub> (**2**)

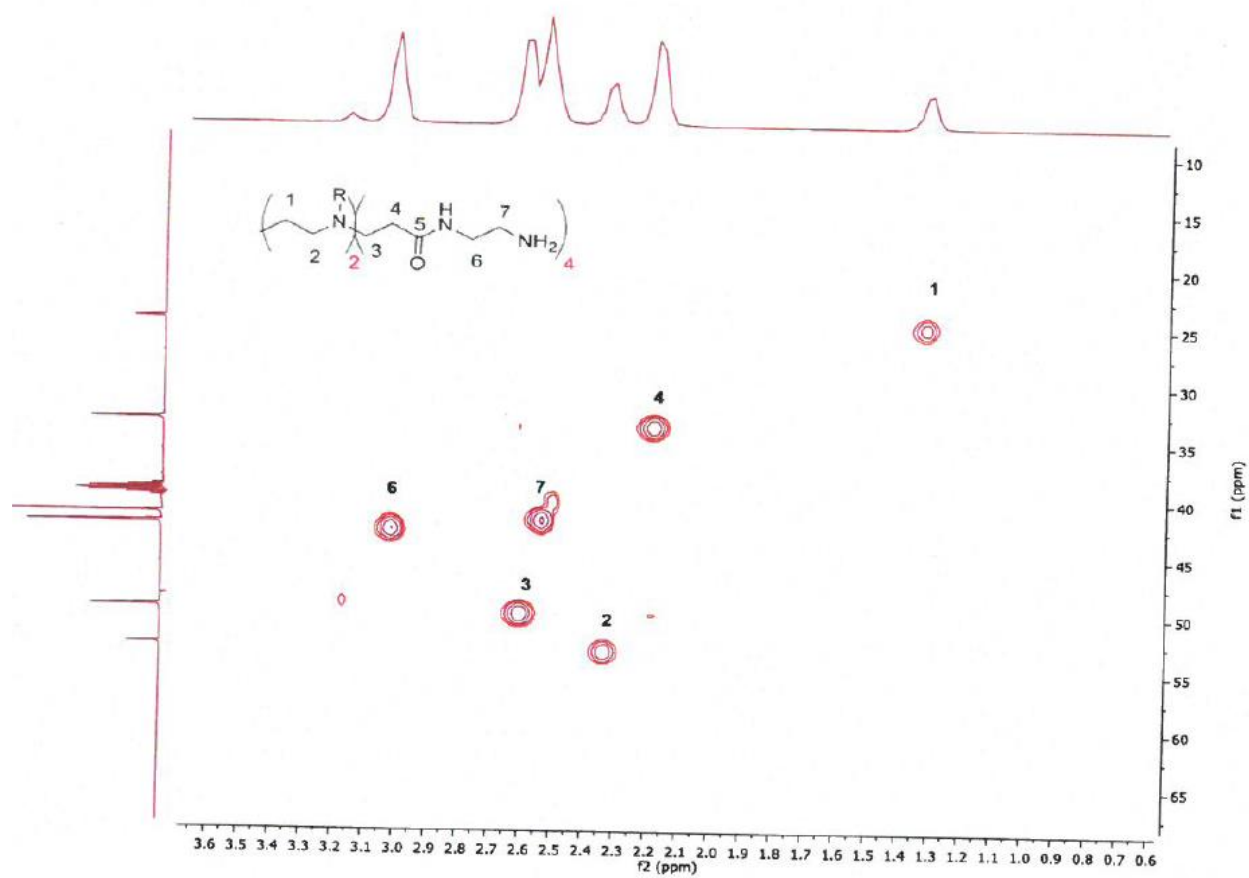

Figure S6:  $^1\text{H}$ -NMR (500 MHz in  $\text{DMSO}-\text{D}_6$ ) of Compound **3**.

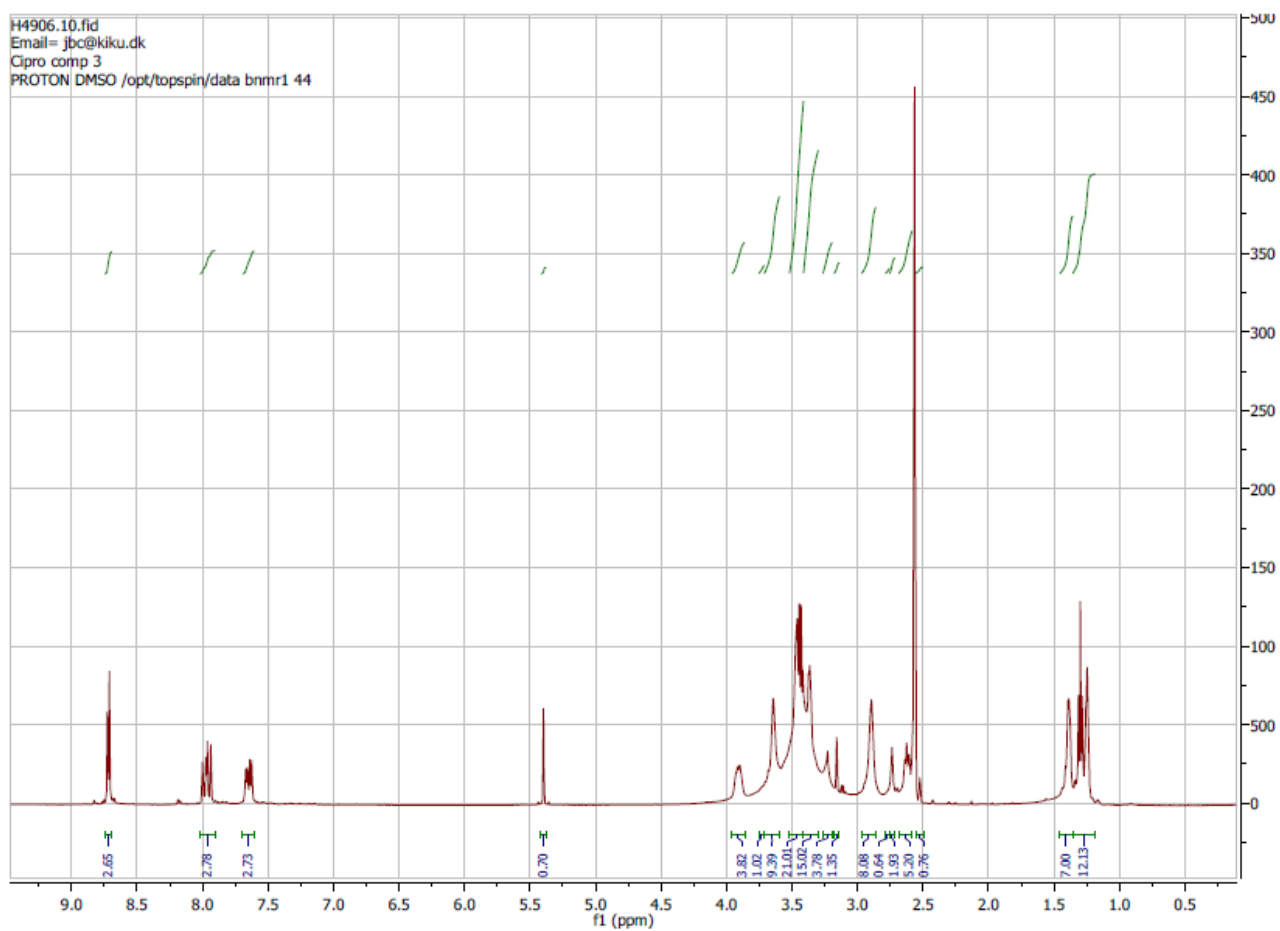

Figure S7:  $^{13}\text{C}$ -NMR (125 MHz in  $\text{DMSO}-\text{D}_6$ ) of Compound **3**.

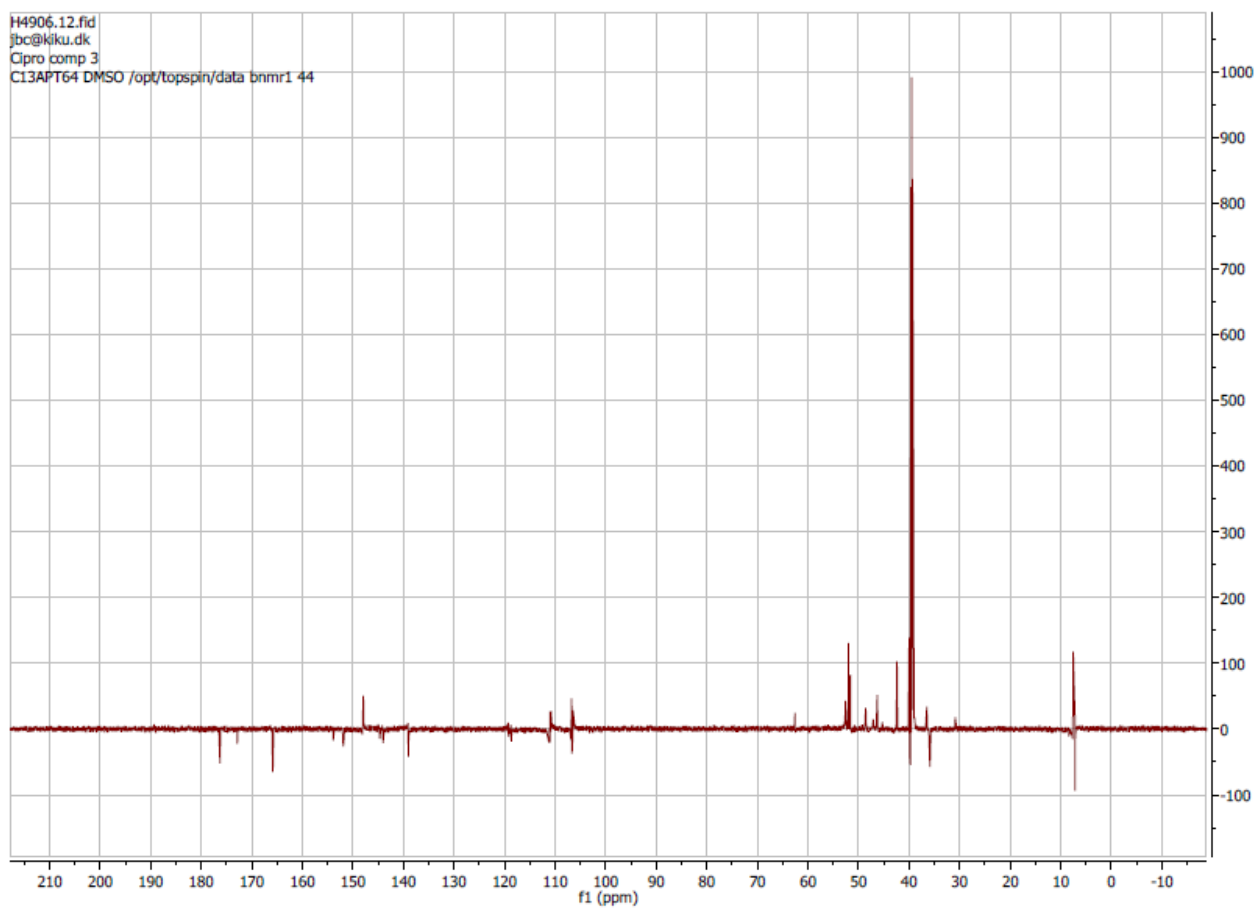

Figure S8: COSY-NMR (500 MHz in DMSO-D<sub>6</sub>) of Compound **3**.

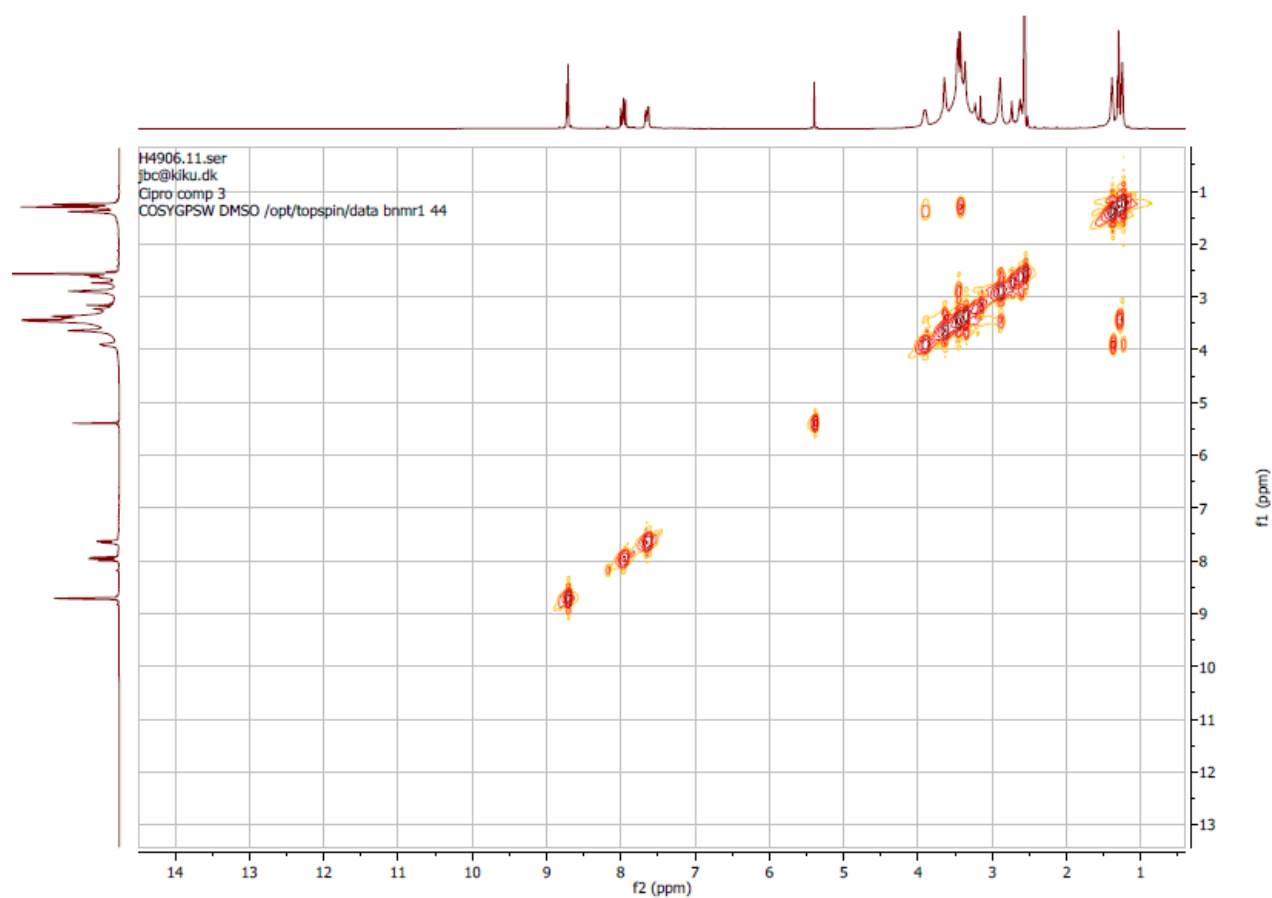

Figure S9: HSQC-NMR (125 & 500 MHz in DMSO-D<sub>6</sub>) of Compound **3**

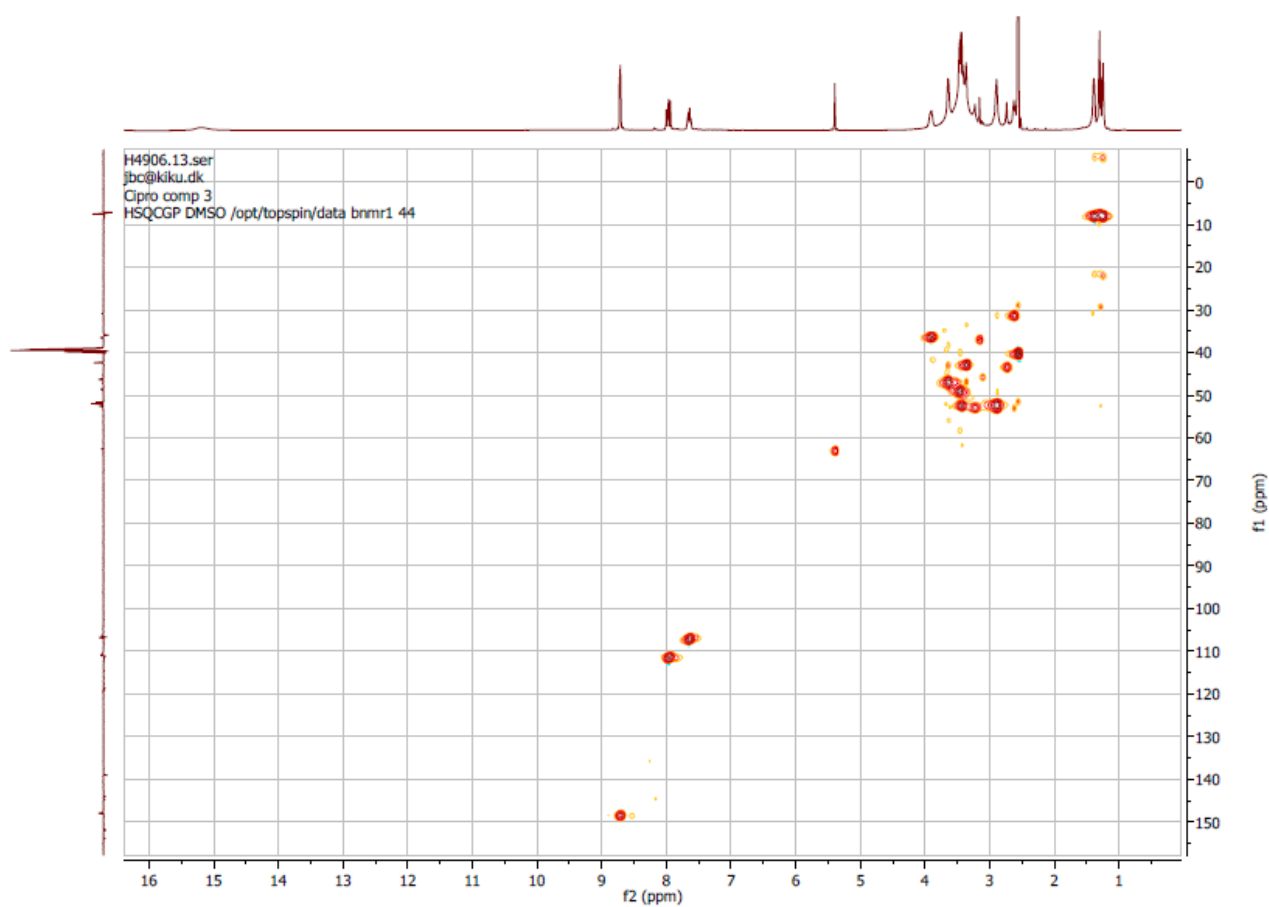

Figure S10: ES-MS of Compound 3

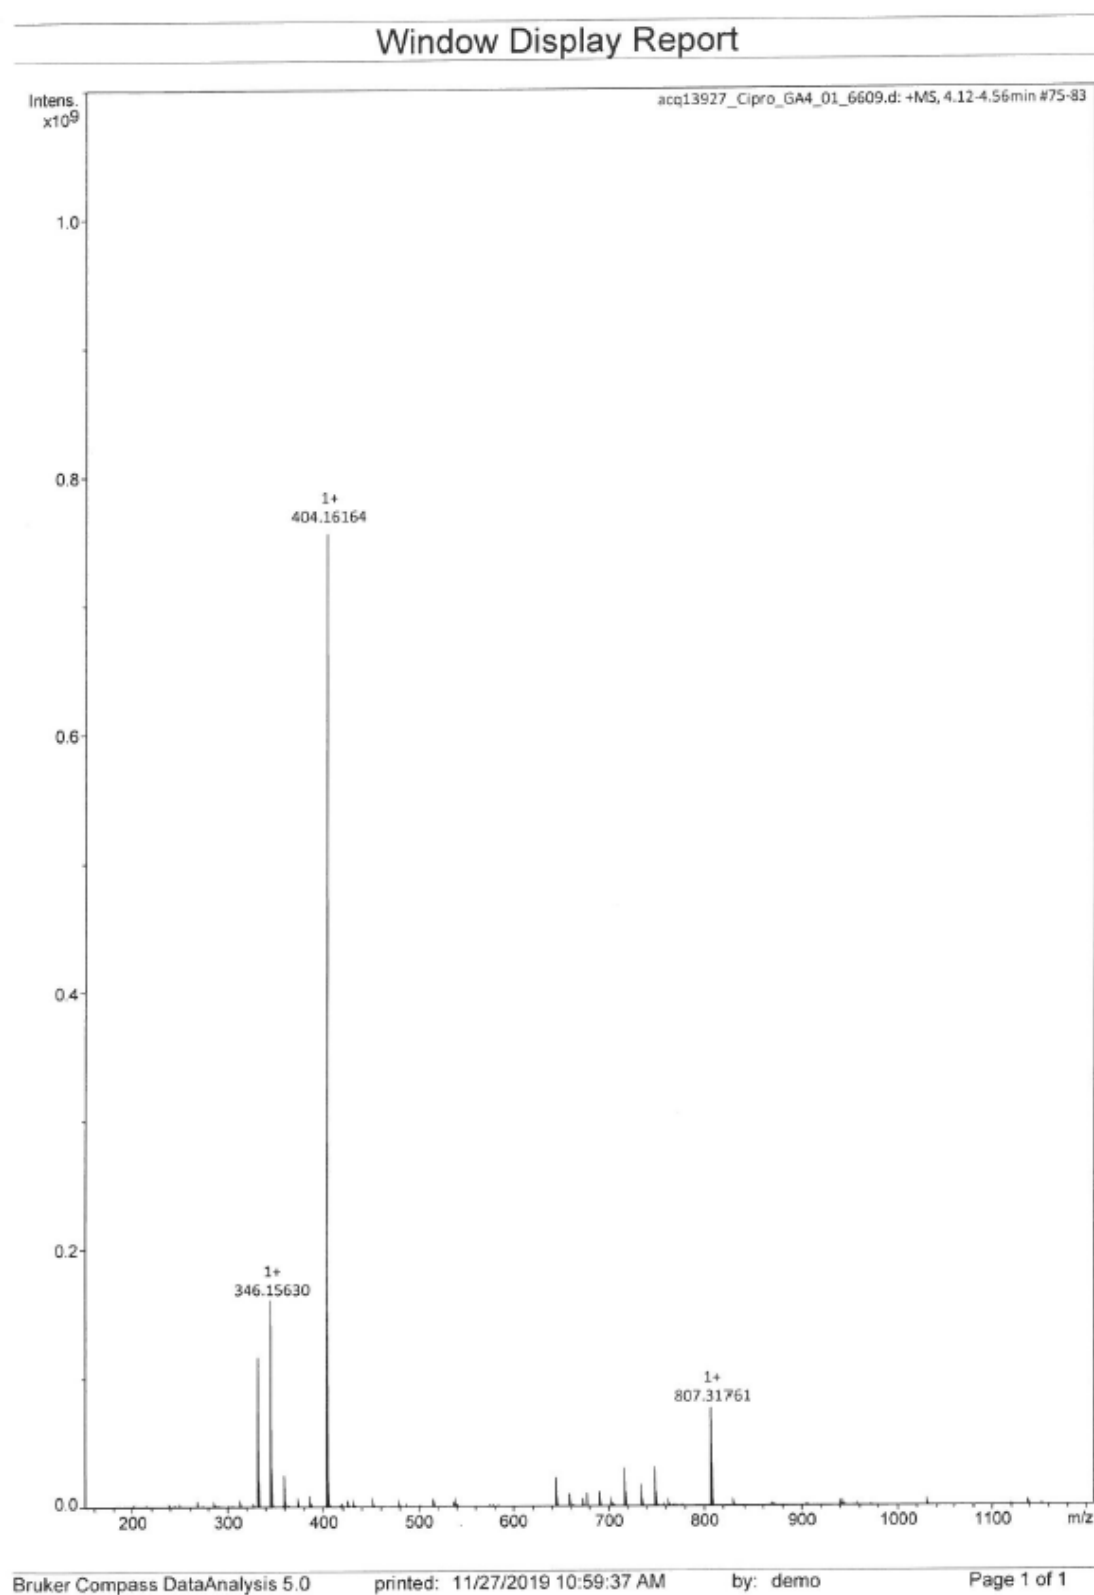

Figure S11: ES-MS of Compound 3

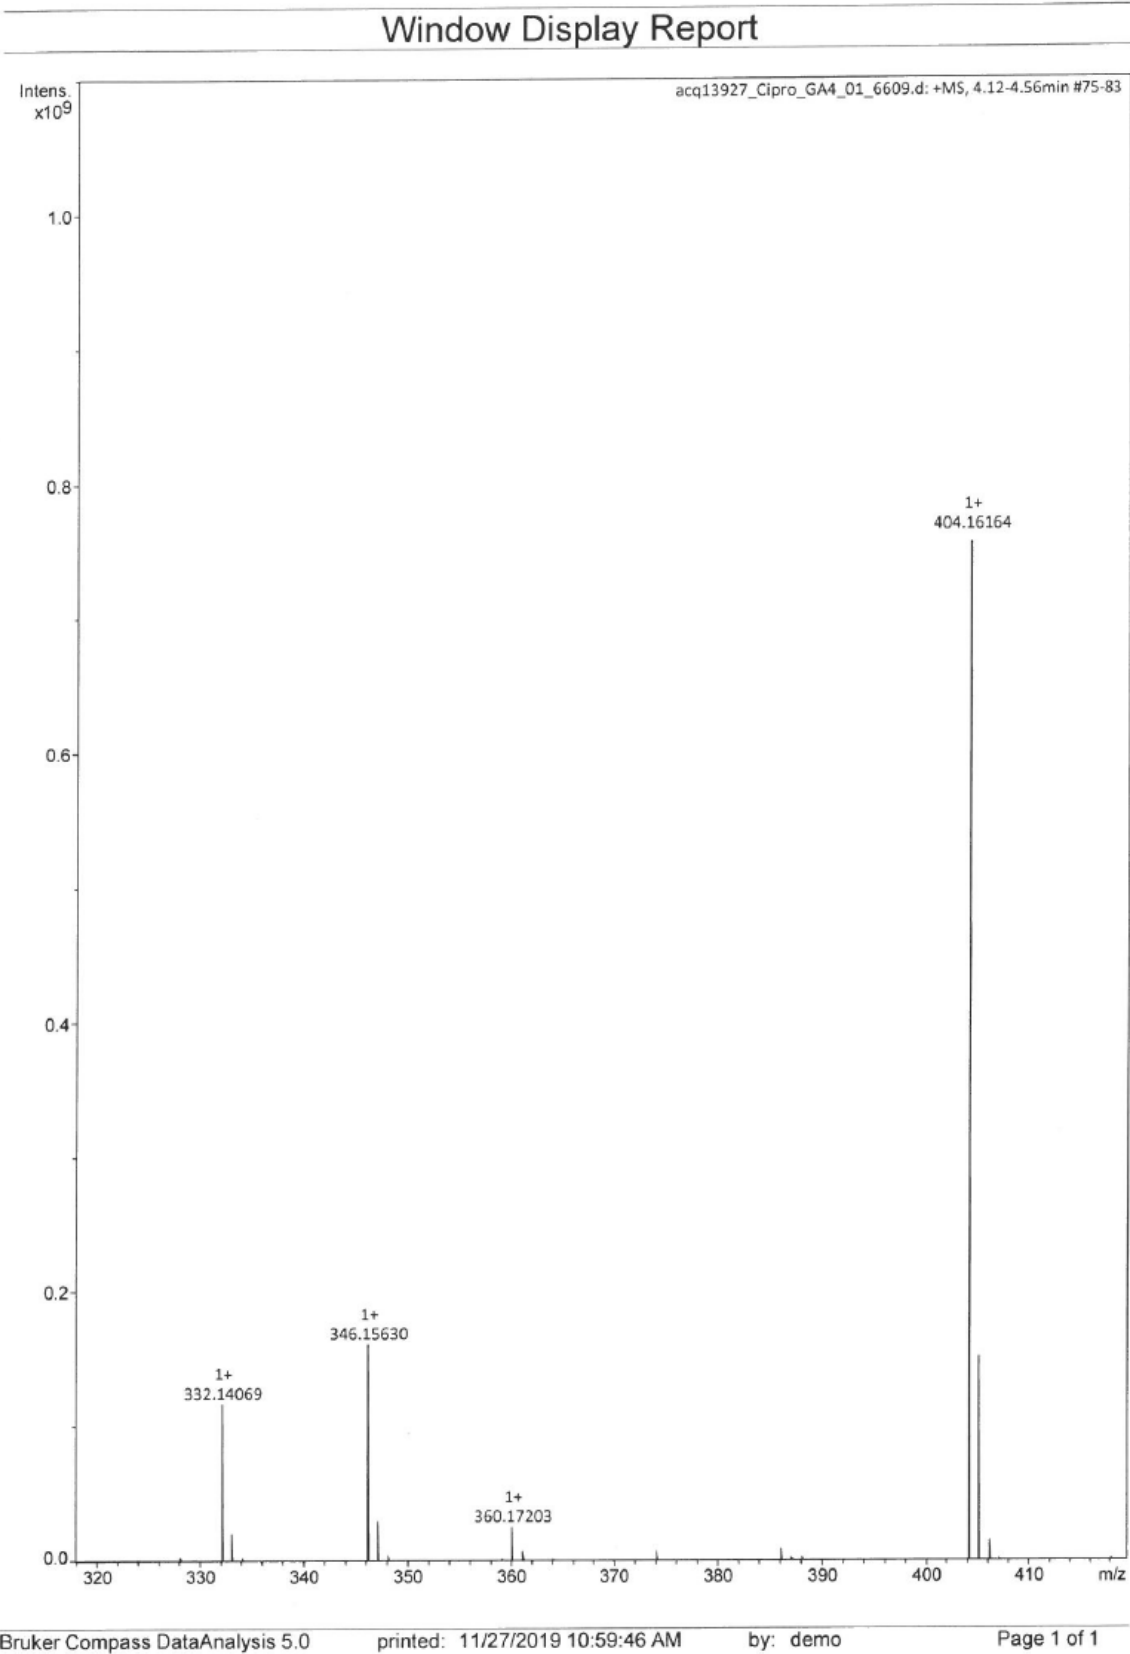

Figure S12: ES-MS of Compound 3

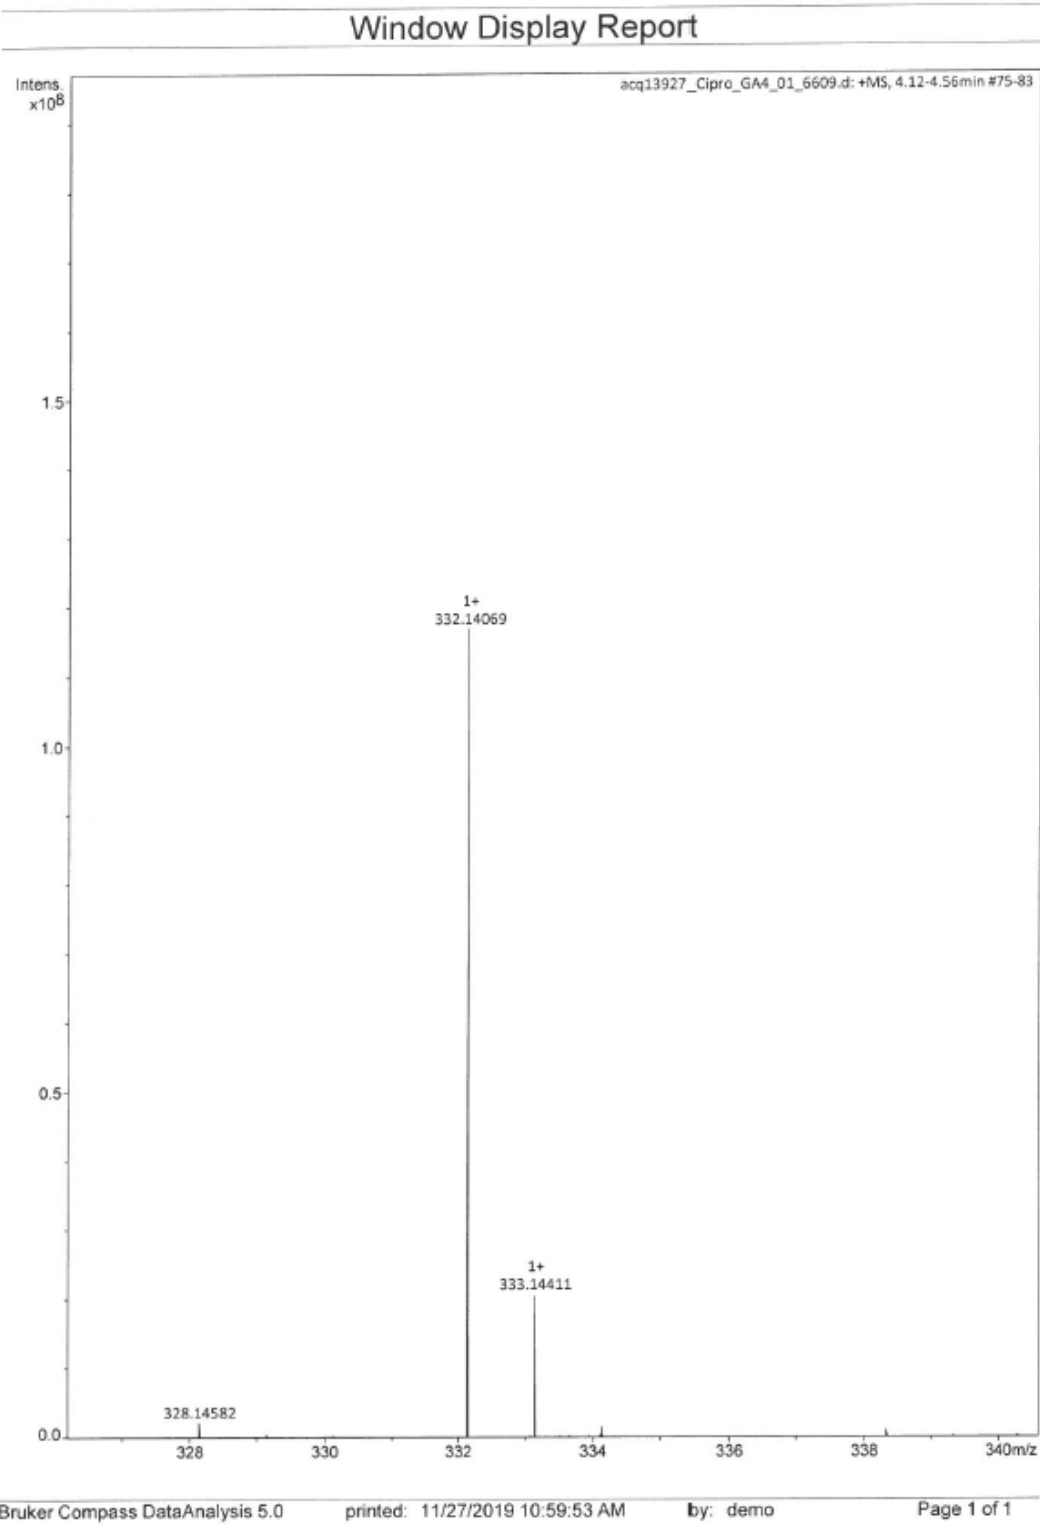

Figure S13: ES-MS of Compound 3

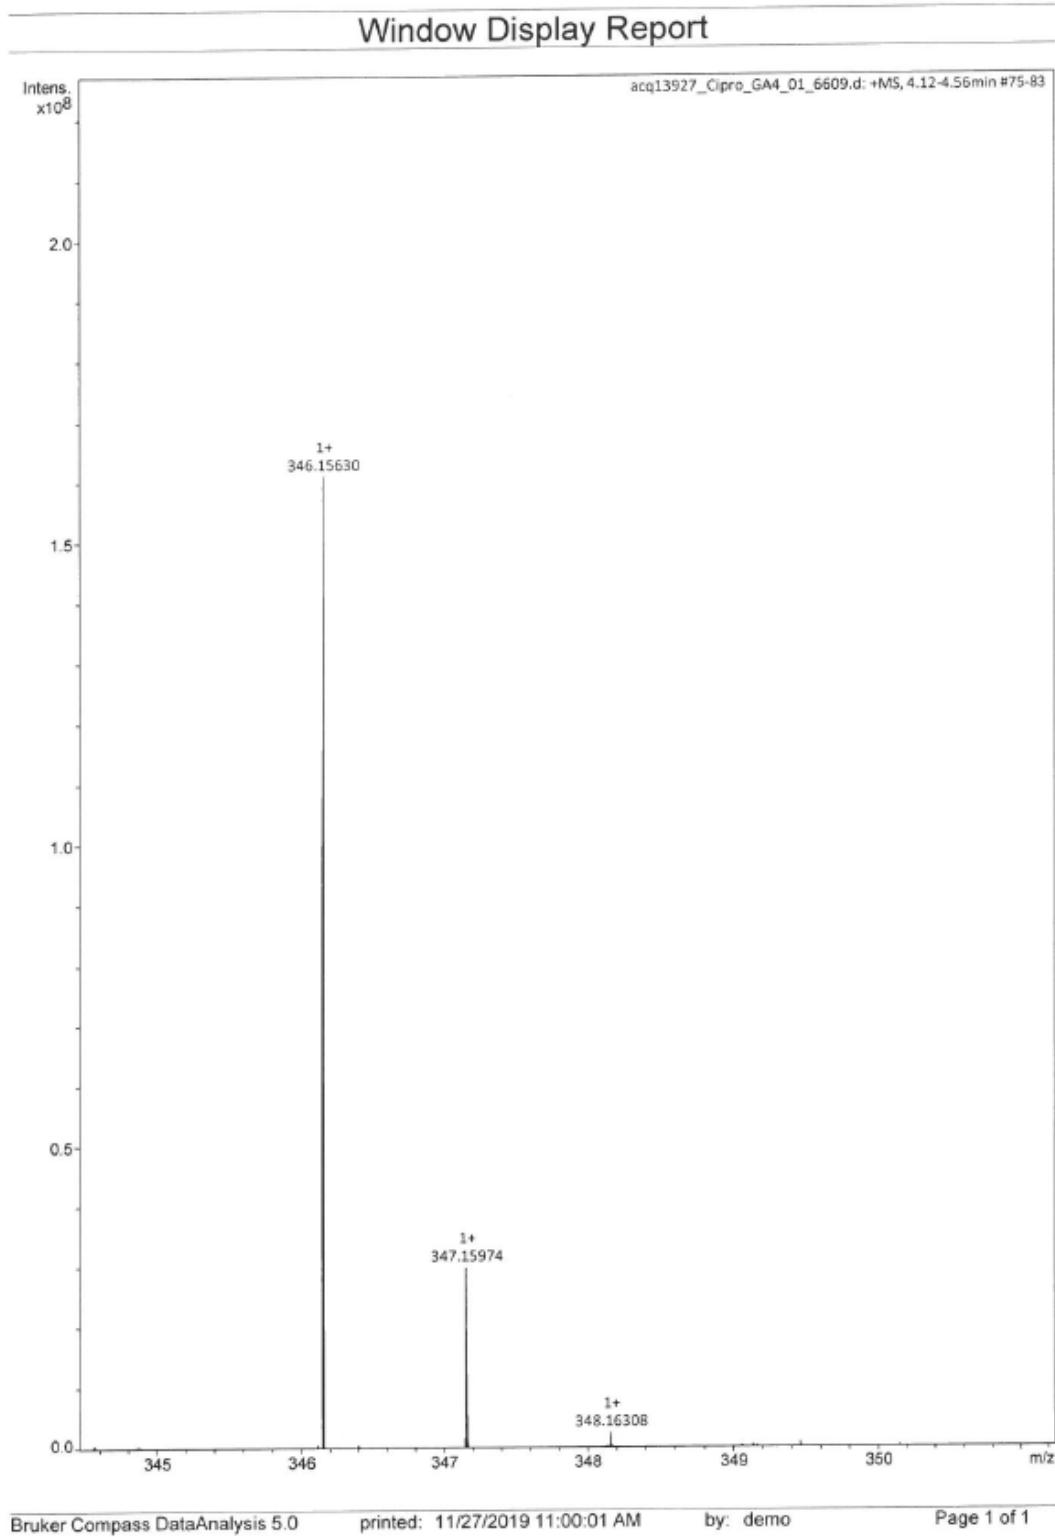

Figure S14: ES-MS of Compound 3

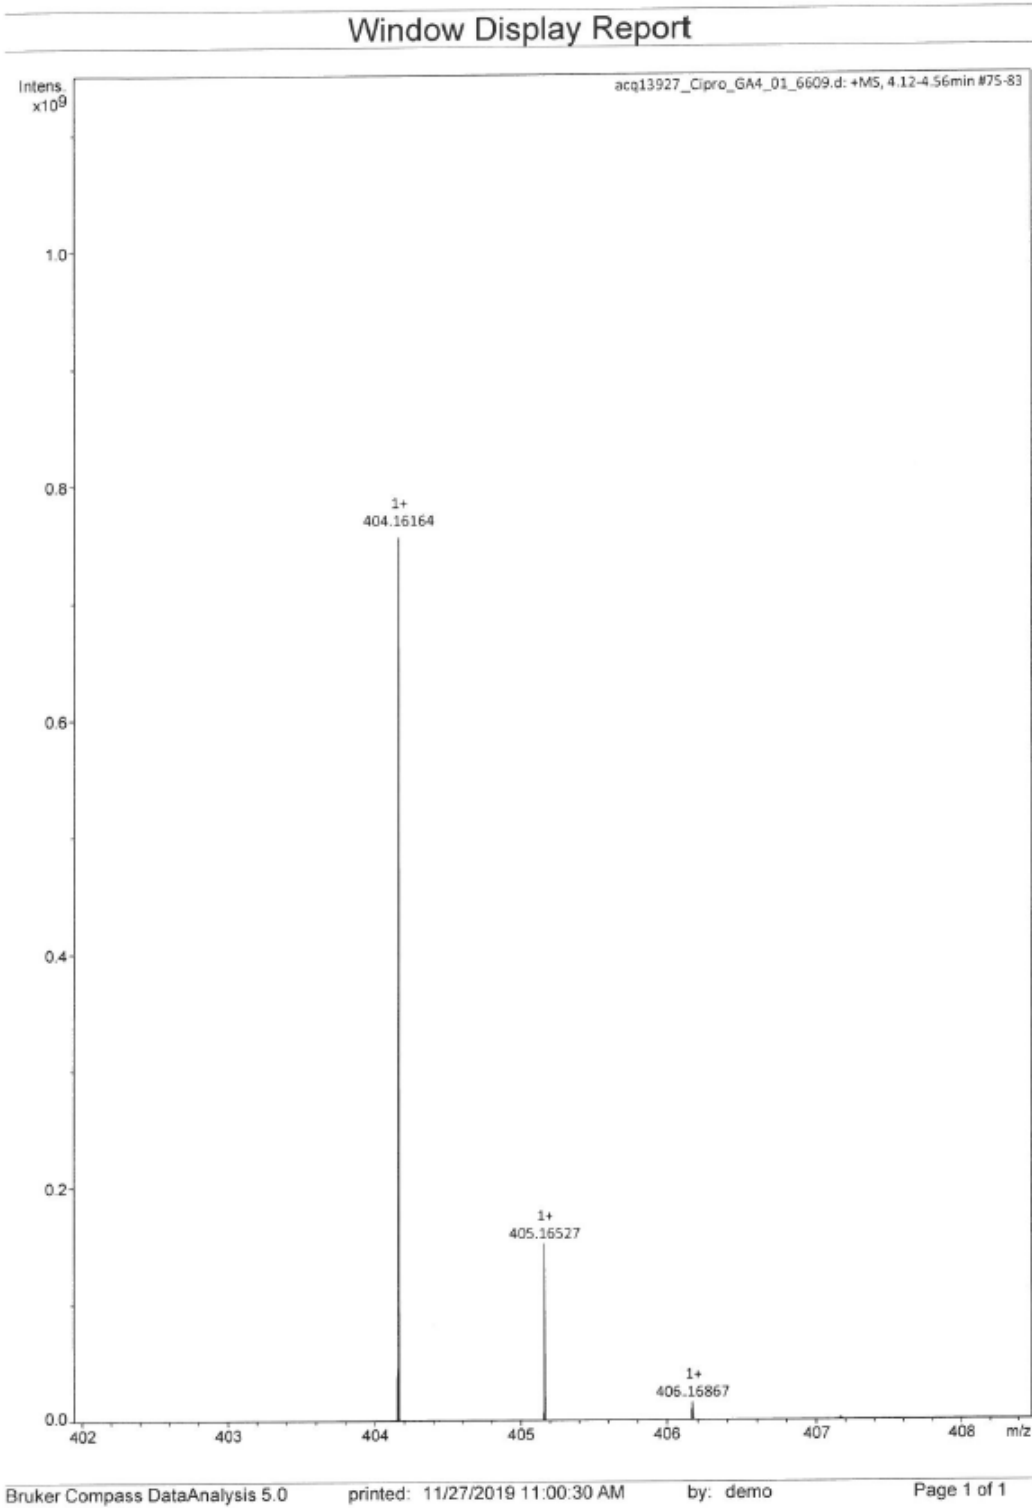

Figure S15:  $^1\text{H}$ -NMR (500 MHz in  $\text{DMSO}-d_6$ ) of  $\text{DAB-PAMAM-G0-(Cipro-COOH)}_4 \bullet 6\text{HCl}$  (4)

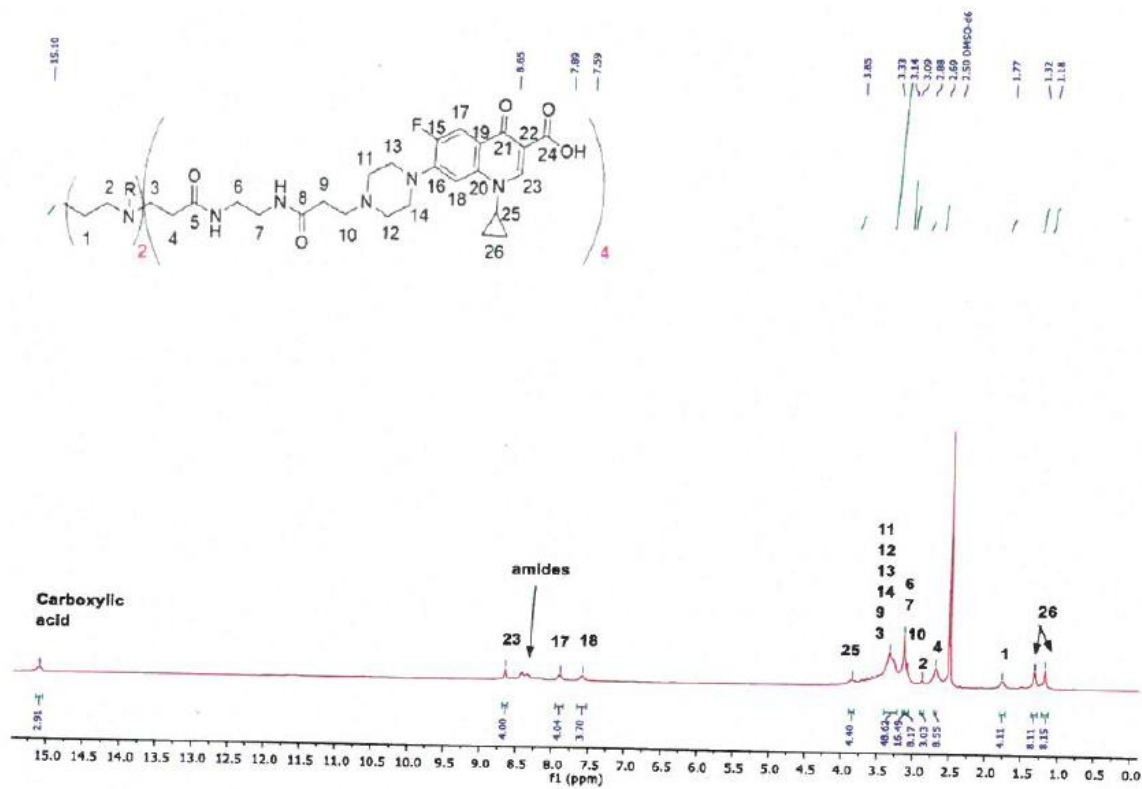

**Figure S16:**  $^{13}\text{C}$ -NMR (126 MHz in DMSO- $d_6$ ) of DAB-PAMAM-G0-(Cipro-COOH) $_4$  • 6HCl (4).

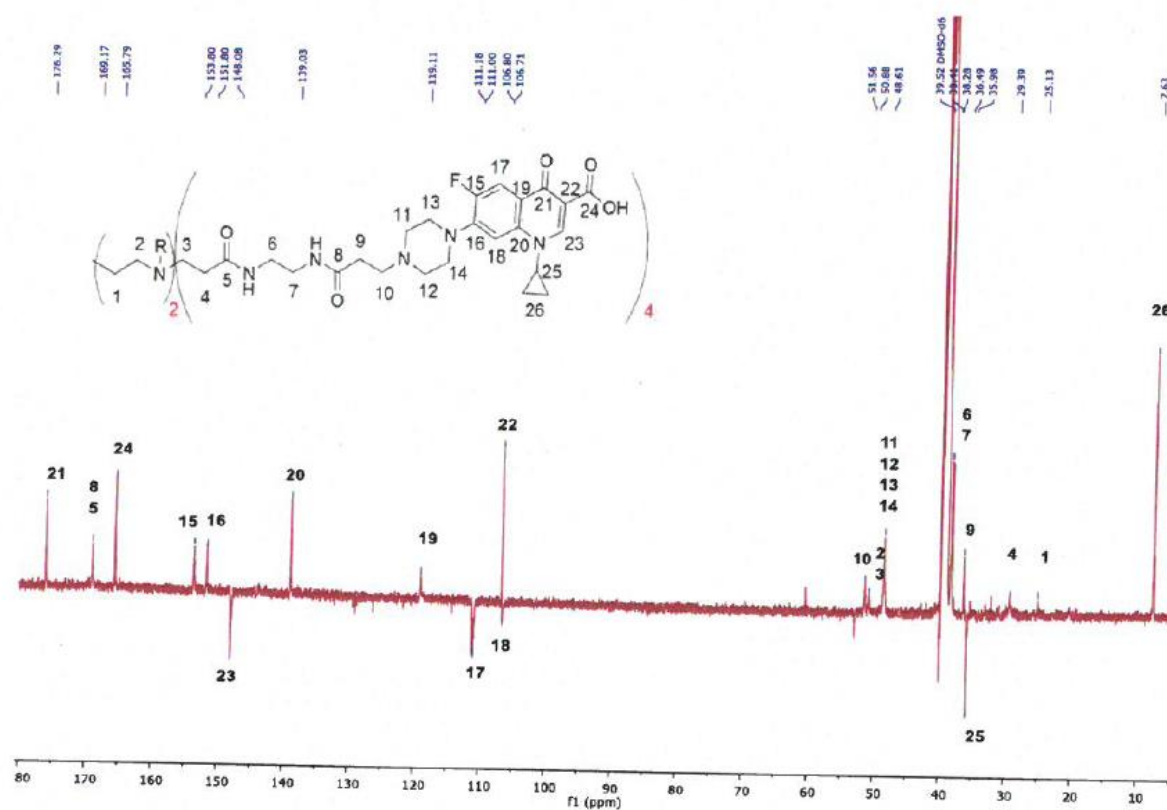

**Figure S17:** COSY-NMR (500 MHz in DMSO- $D_6$ ) of **DAB-PAMAM-G0-(Cipro-COOH) $_4$  • 6HCl (4)**.

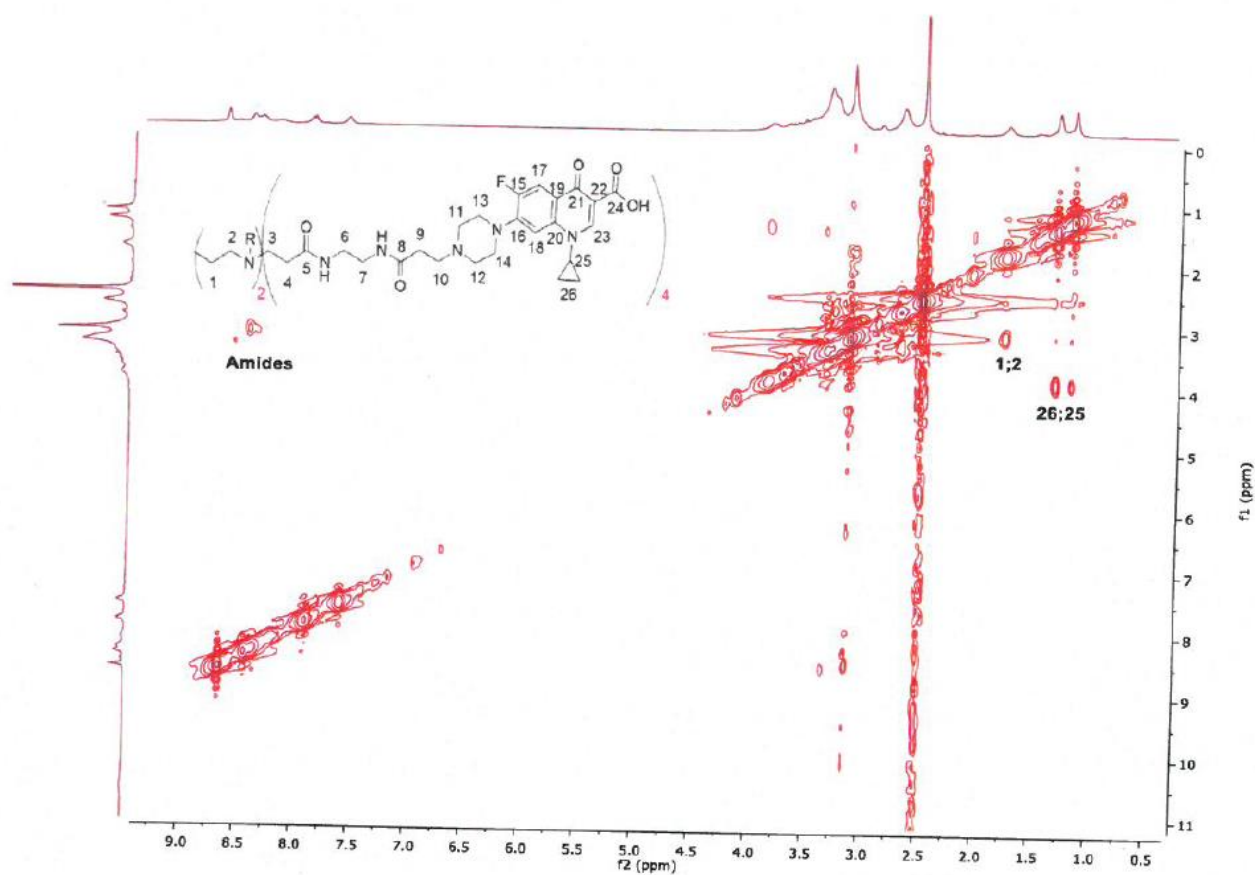

**Figure S18:** HSQC-NMR (125 & 500 MHz in DMSO- $D_6$ ) of **DAB-PAMAM-G0-(Cipro-COOH) $_4$  • 6HCl (4)**.

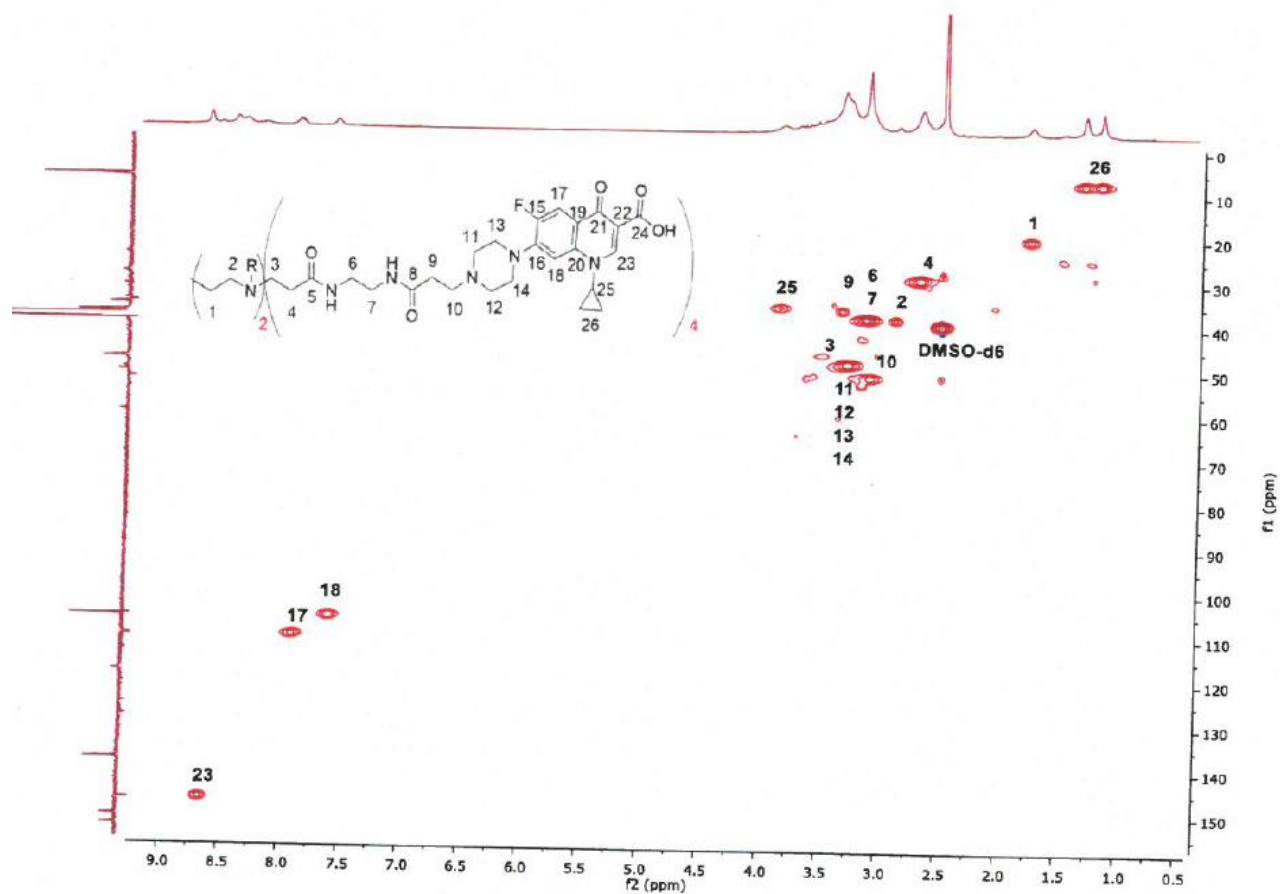

**Figure S19:**  $^{19}\text{F}$ -NMR (470 MHz in  $\text{DMSO-}d_6$ ) of **DAB-PAMAM-G0-(Cipro-COOH) $_4$  • 6HCl (4)**.

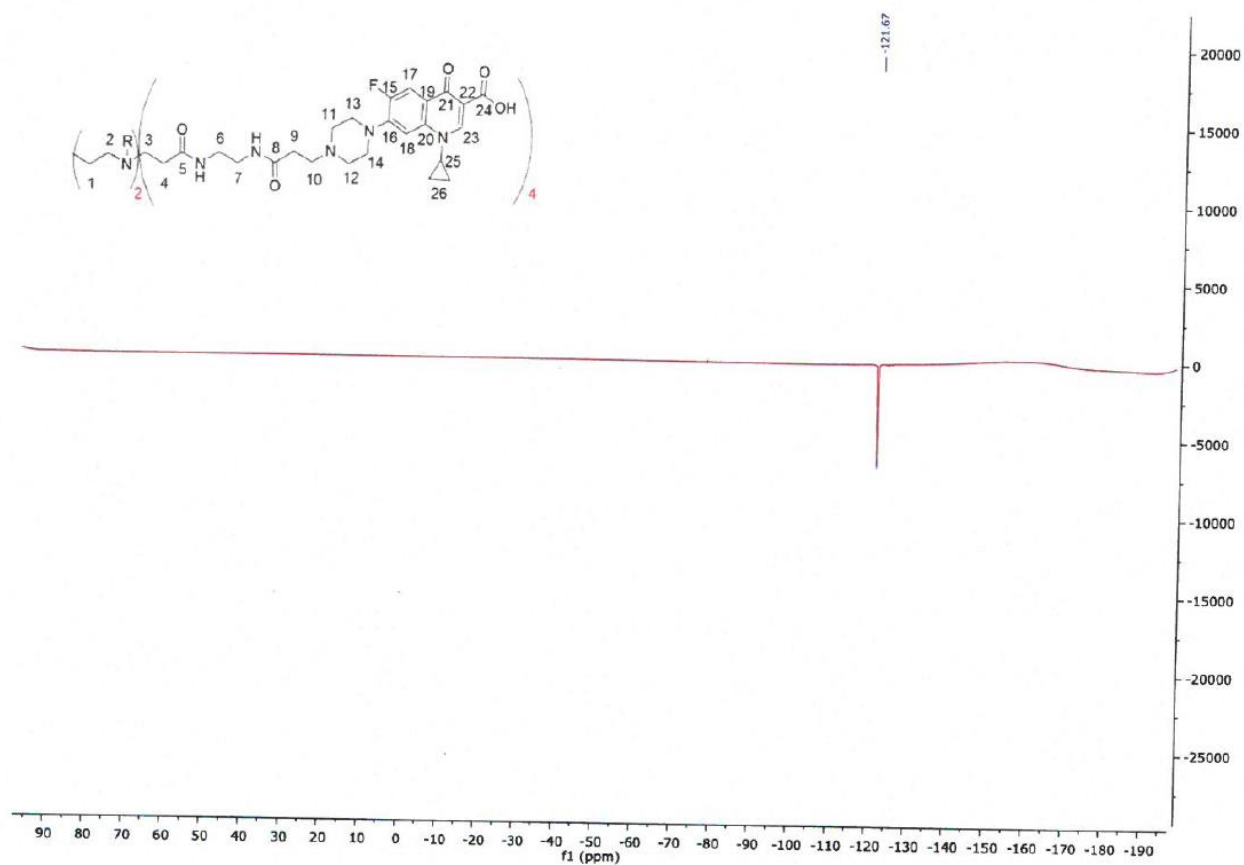

**Figure S20:** ESI-MS of DAB-PAMAM-G0-(Cipro-COOH)<sub>4</sub> • 6HCl (4).

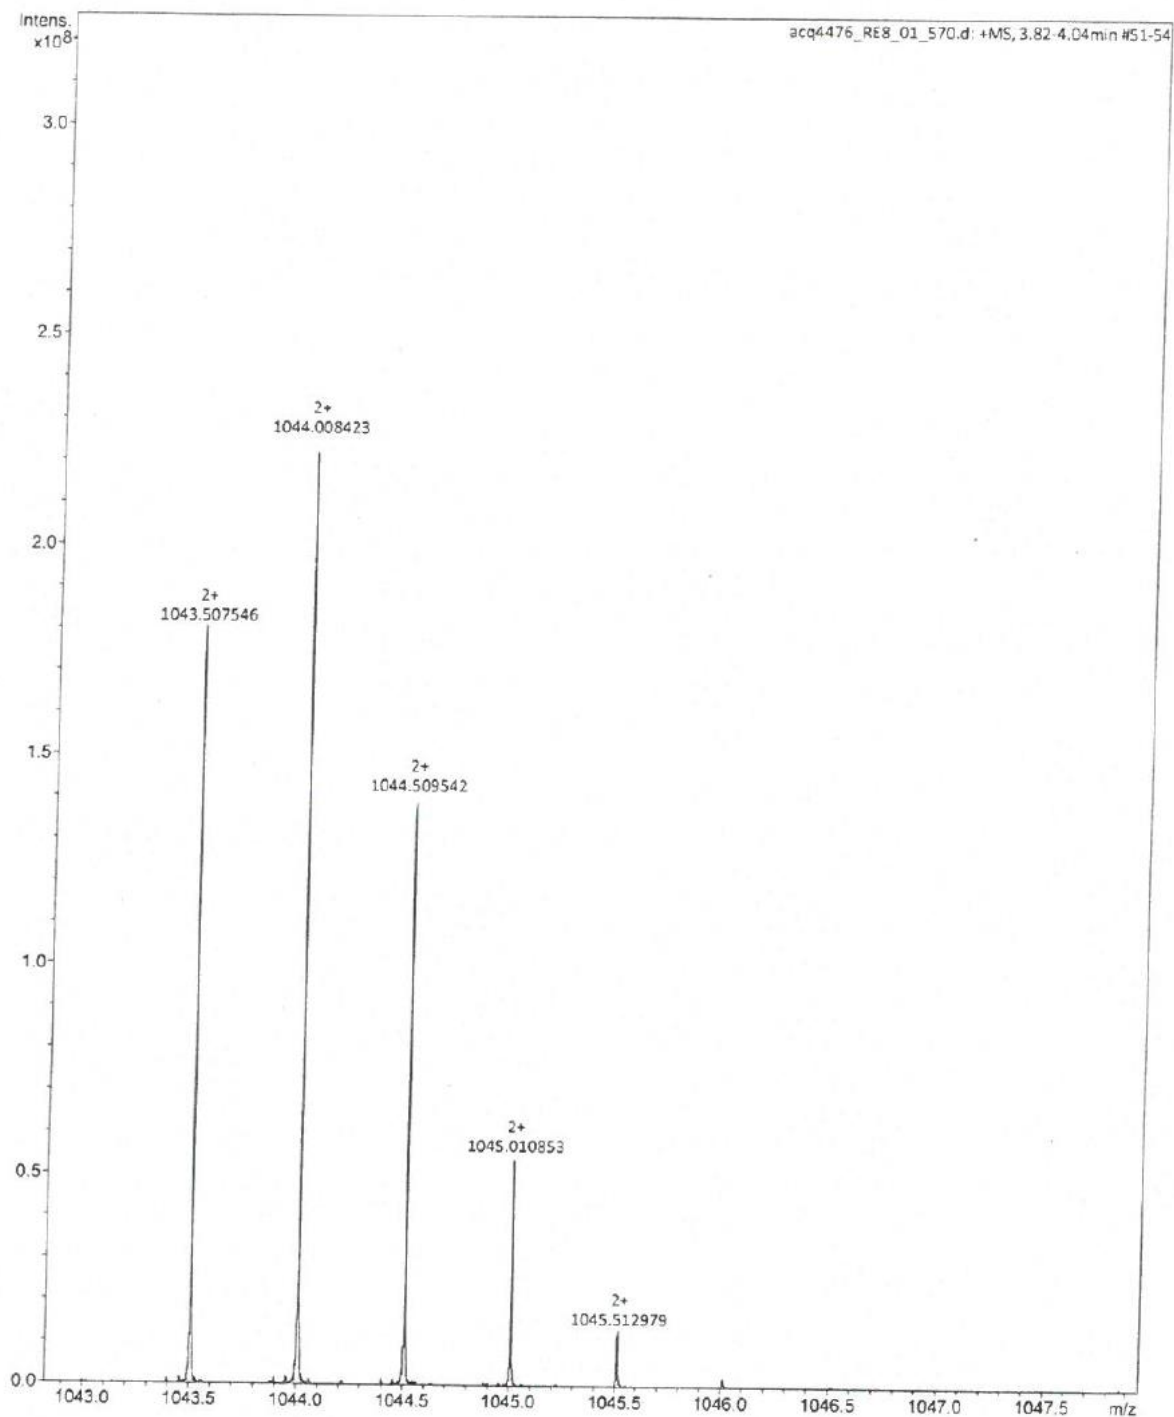

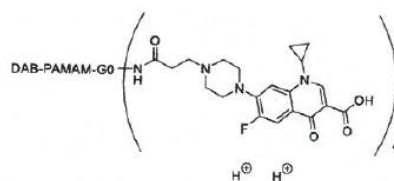

Chemical Formula:  $C_{104}H_{134}F_4N_{22}O_{20}^{2+}$

Molecular Weight: 2088.3425

m/z: 1044.0052 (100.0%), 1043.5035 (88.9%), 1044.5069 (55.7%), 1045.0085 (10.4%), 1045.0085 (10.1%), 1044.5037 (8.1%), 1044.0020 (7.2%), 1045.5102 (4.6%), 1045.0073 (4.1%), 1044.5056 (3.7%), 1045.0054 (3.1%), 1045.5090 (2.3%), 1044.5083 (1.5%), 1045.5070 (1.5%), 1045.0054 (1.4%), 1044.0066 (1.4%), 1046.0119 (1.1%), 1045.5102 (1.0%)

**Figure S21:** ESI-MS of DAB-PAMAM-G0-(Cipro-COOH)<sub>4</sub> • 6HCl (4).

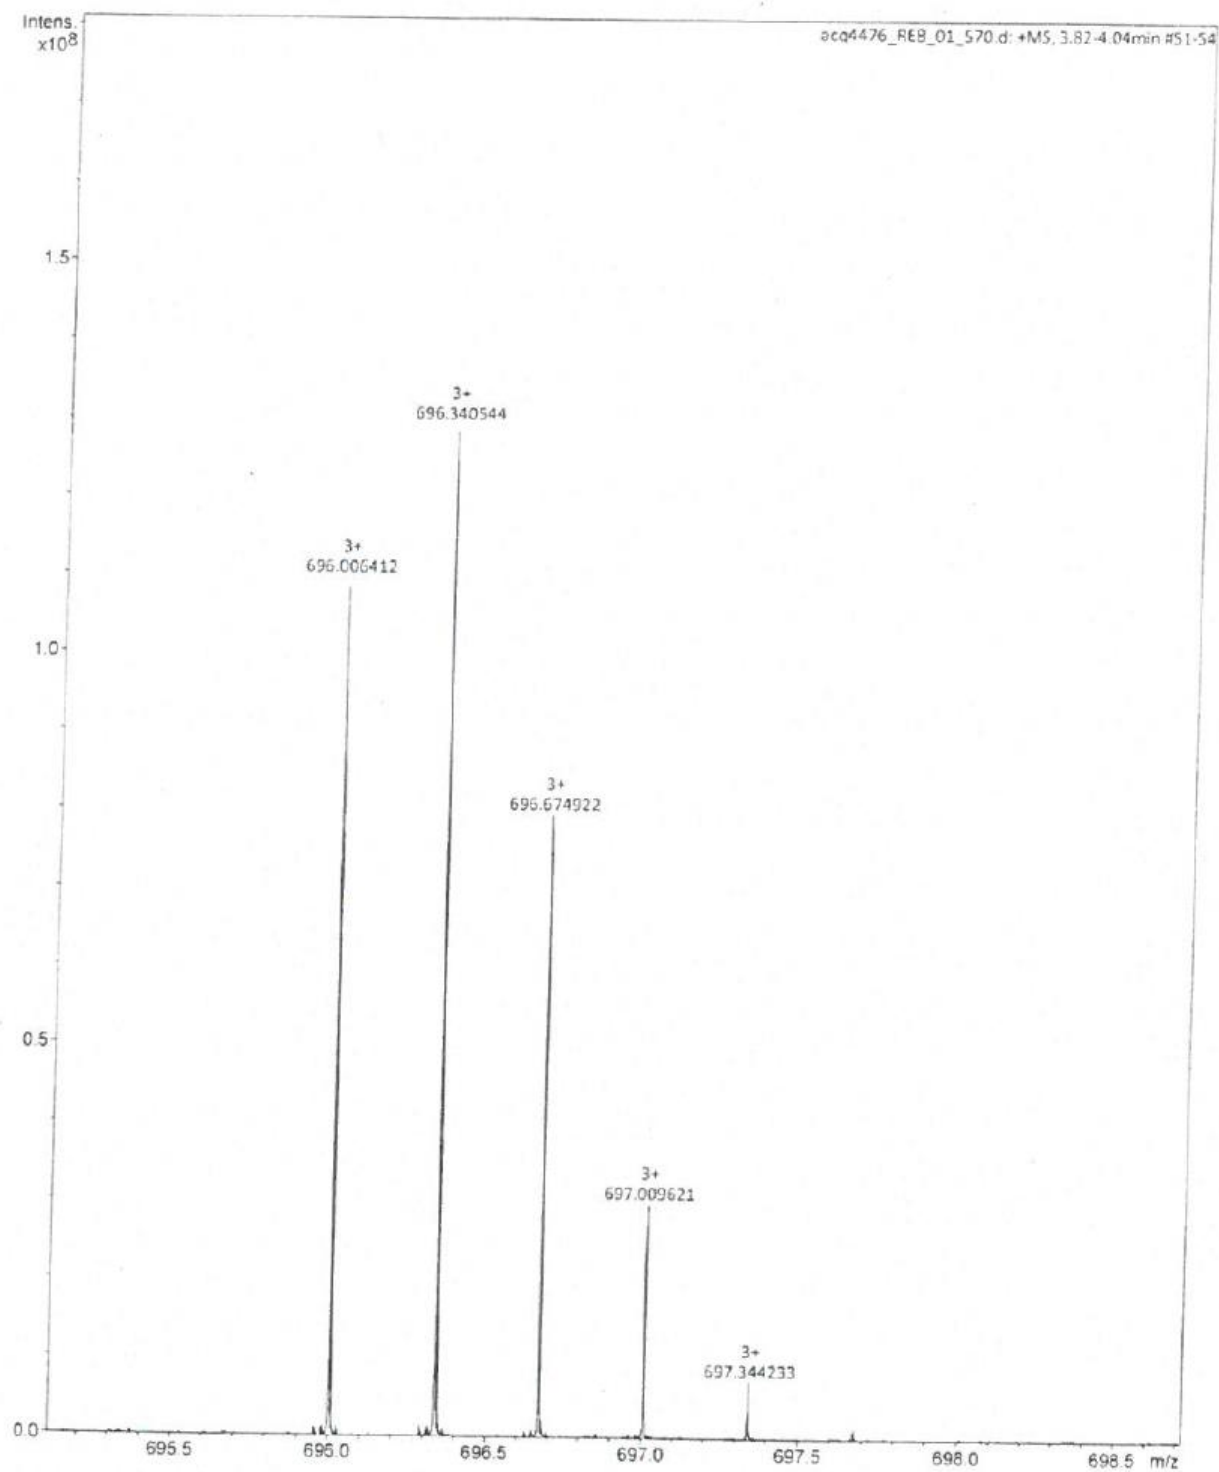

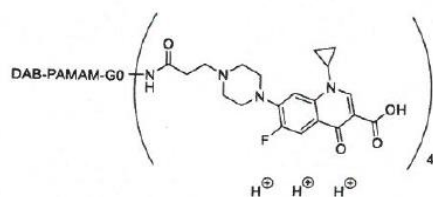

Chemical Formula:  $C_{104}H_{135}F_4N_{22}O_{20}^{3+}$

Molecular Weight: 2089.3500

m/z: 696.3392 (100.0%), 696.0048 (88.9%), 696.6737 (38.0%), 697.0081 (18.9%), 696.6737 (17.7%), 696.6716 (8.1%), 696.3371 (7.2%), 697.3426 (5.5%), 697.0060 (4.5%), 697.0073 (4.1%), 696.6728 (3.7%), 697.0081 (1.6%), 697.3417 (1.6%), 696.6746 (1.6%), 696.3402 (1.4%), 697.6770 (1.2%)

**Figure S22:** ESI-MS of DAB-PAMAM-G0-(Cipro-COOH)<sub>4</sub> • 6HCl (4).

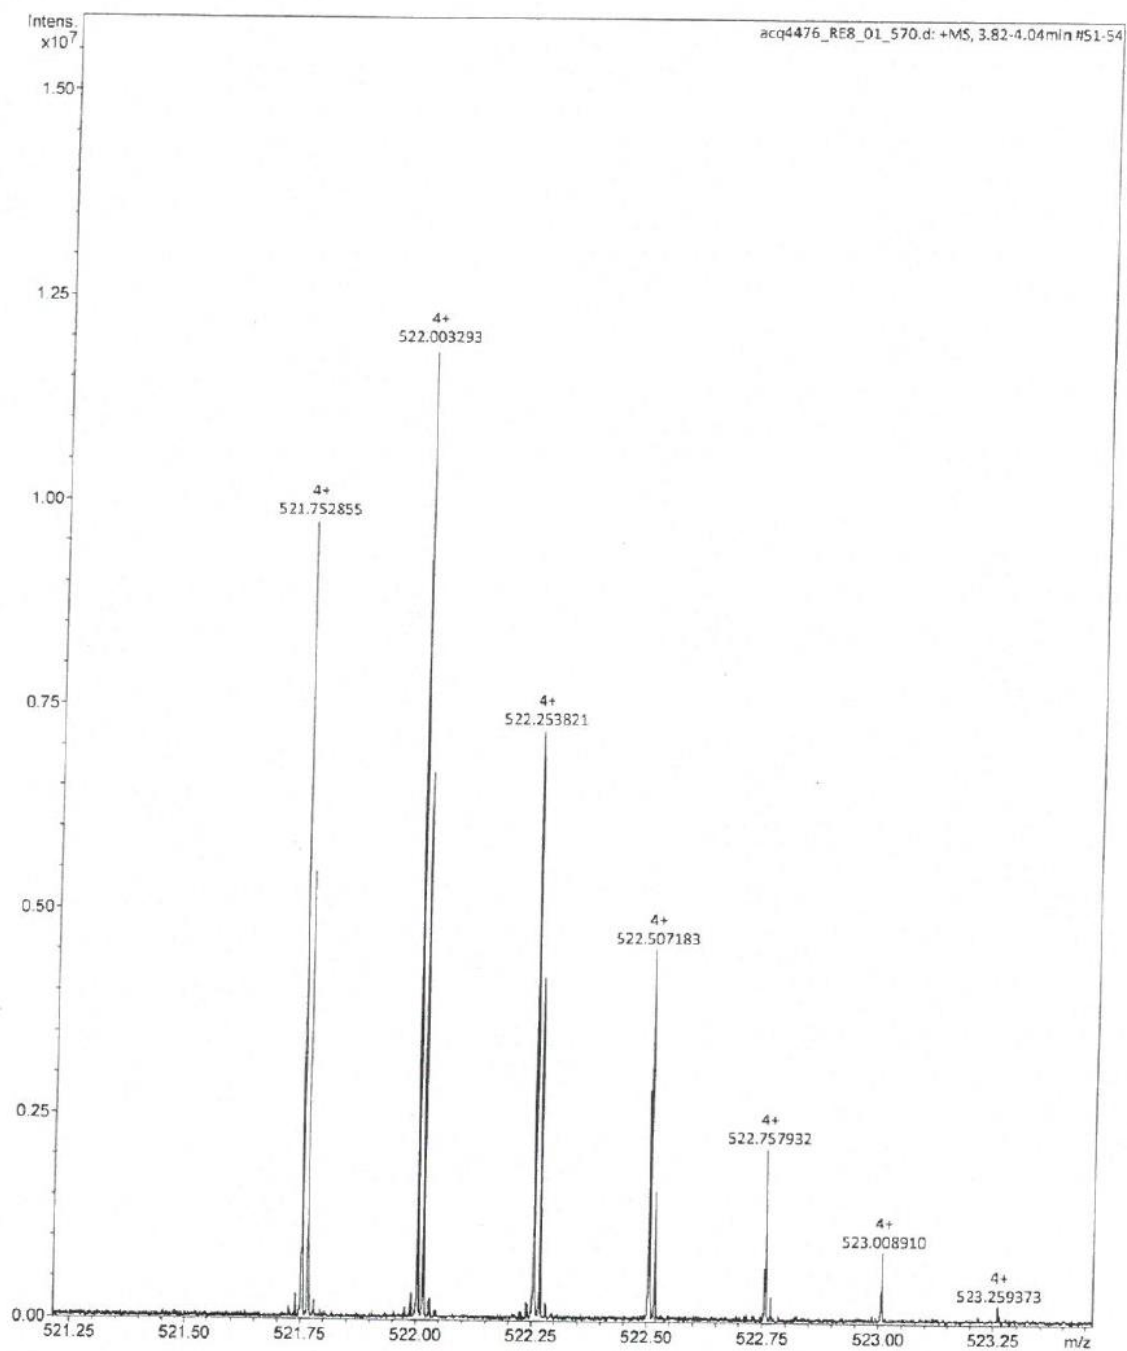

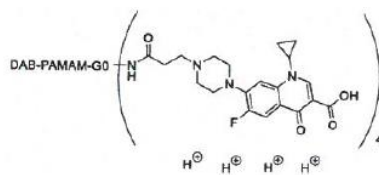

Chemical Formula:  $C_{104}H_{136}F_4N_{22}O_{20}^{4+}$

Molecular Weight: 2090.3574

m/z: 522.5062 (100.0%), 522.2554 (88.9%), 522.7571 (55.7%), 523.0079 (10.4%), 523.0079 (10.1%), 522.7555 (8.1%), 522.5046 (7.2%), 523.2587 (4.6%), 523.0073 (4.1%), 522.7564 (3.7%), 523.0063 (3.1%), 523.2581 (2.3%), 522.7578 (1.6%), 523.2572 (1.5%), 523.0063 (1.4%), 522.5070 (1.4%), 523.5096 (1.1%), 523.2587 (1.0%)

**Figure S23:**  $^1\text{H}$ -NMR (500 MHz in  $\text{D}_2\text{O}$ ) of **DAB-PAMAM-G0-(Acetamide) $_4$  • 2HCl (5)**

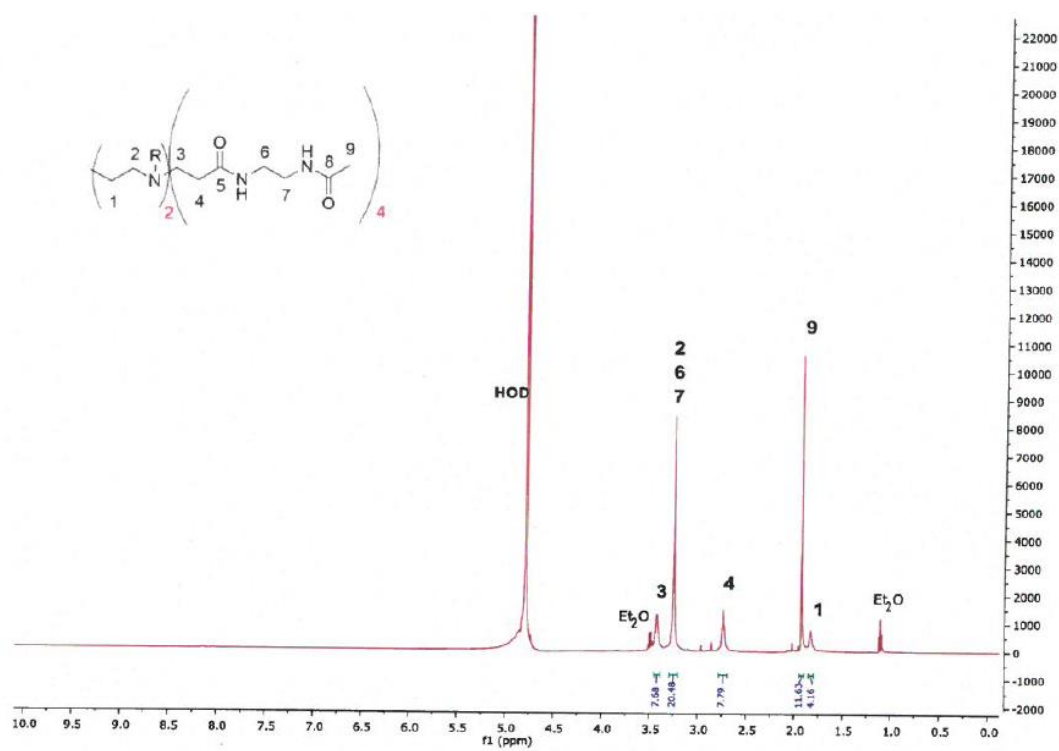

**Figure S24:**  $^{13}\text{C}$ -NMR (125 MHz in  $\text{D}_2\text{O}$ ) of **DAB-PAMAM-G0-(Acetamide) $_4$  • 2HCl (5)**

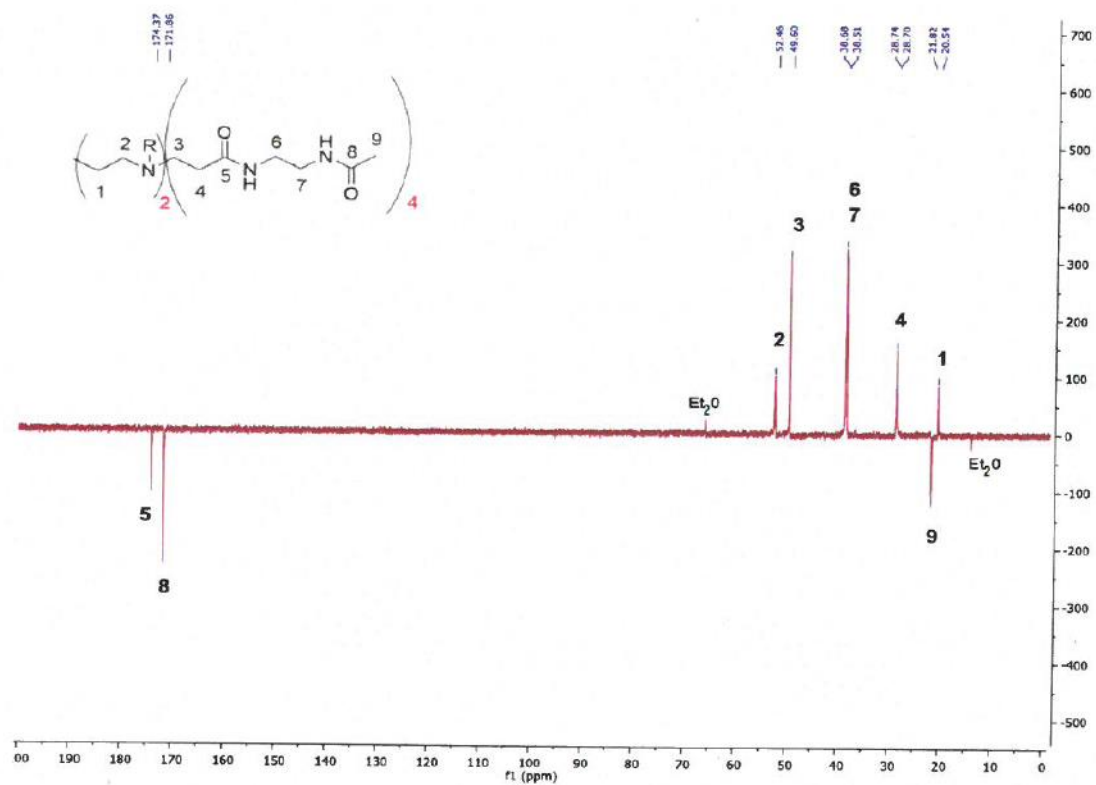

**Figure S25:** COSY-NMR (500 MHz in D<sub>2</sub>O) of **DAB-PAMAM-G0-(Acetamide)<sub>4</sub> • 2HCl (5)**

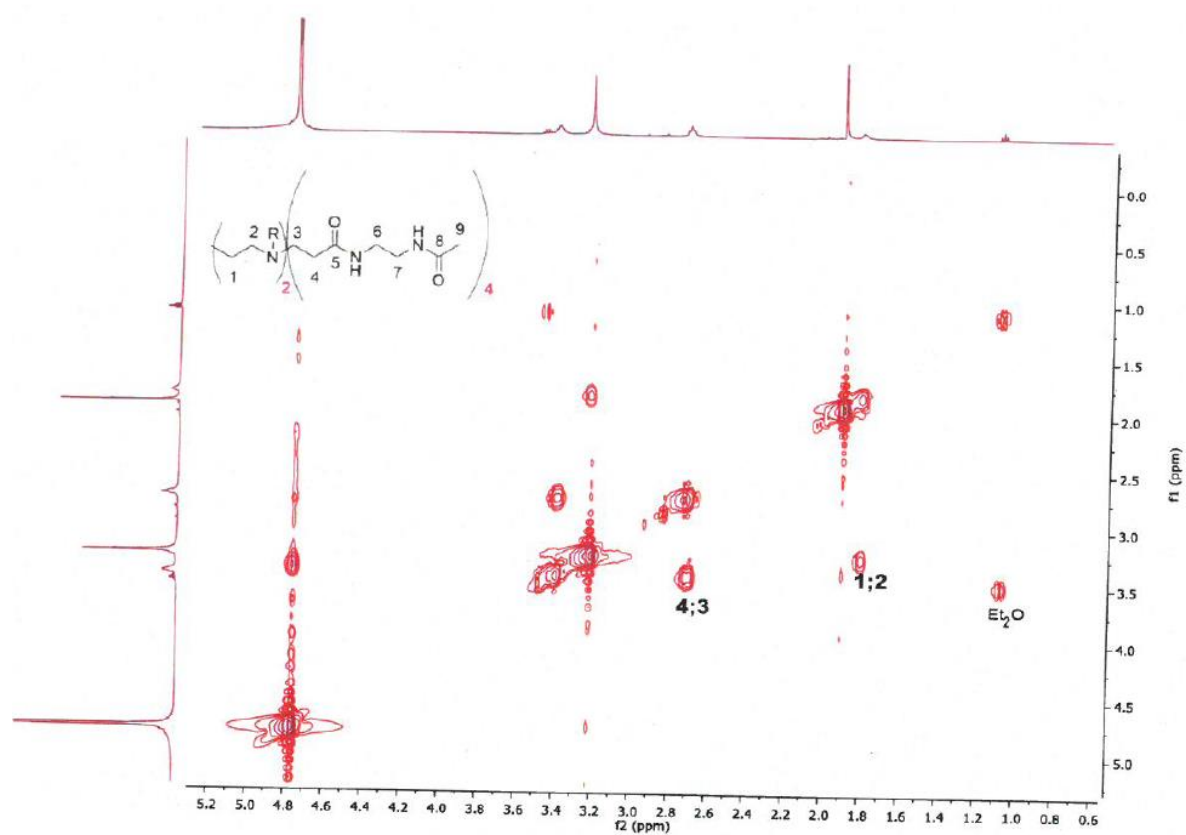

**Figure S26:** HSQC-NMR (125 & 500 MHz in D<sub>2</sub>O) of **DAB-PAMAM-G0-(Acetamide)<sub>4</sub> • 2HCl (5)**

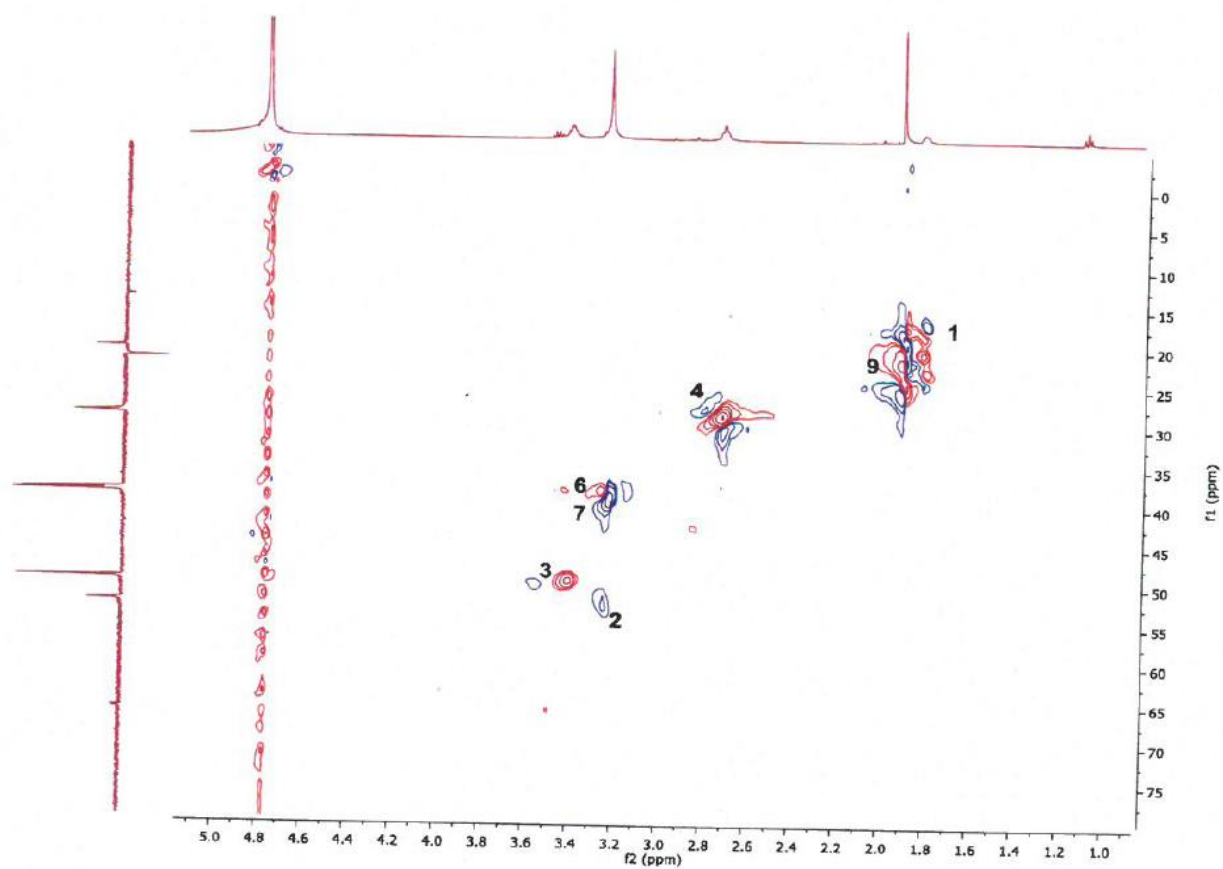

Figure S27: ESI-MS of DAB-PAMAM-G0-(Acetamide)<sub>4</sub> • 2HCl (5)

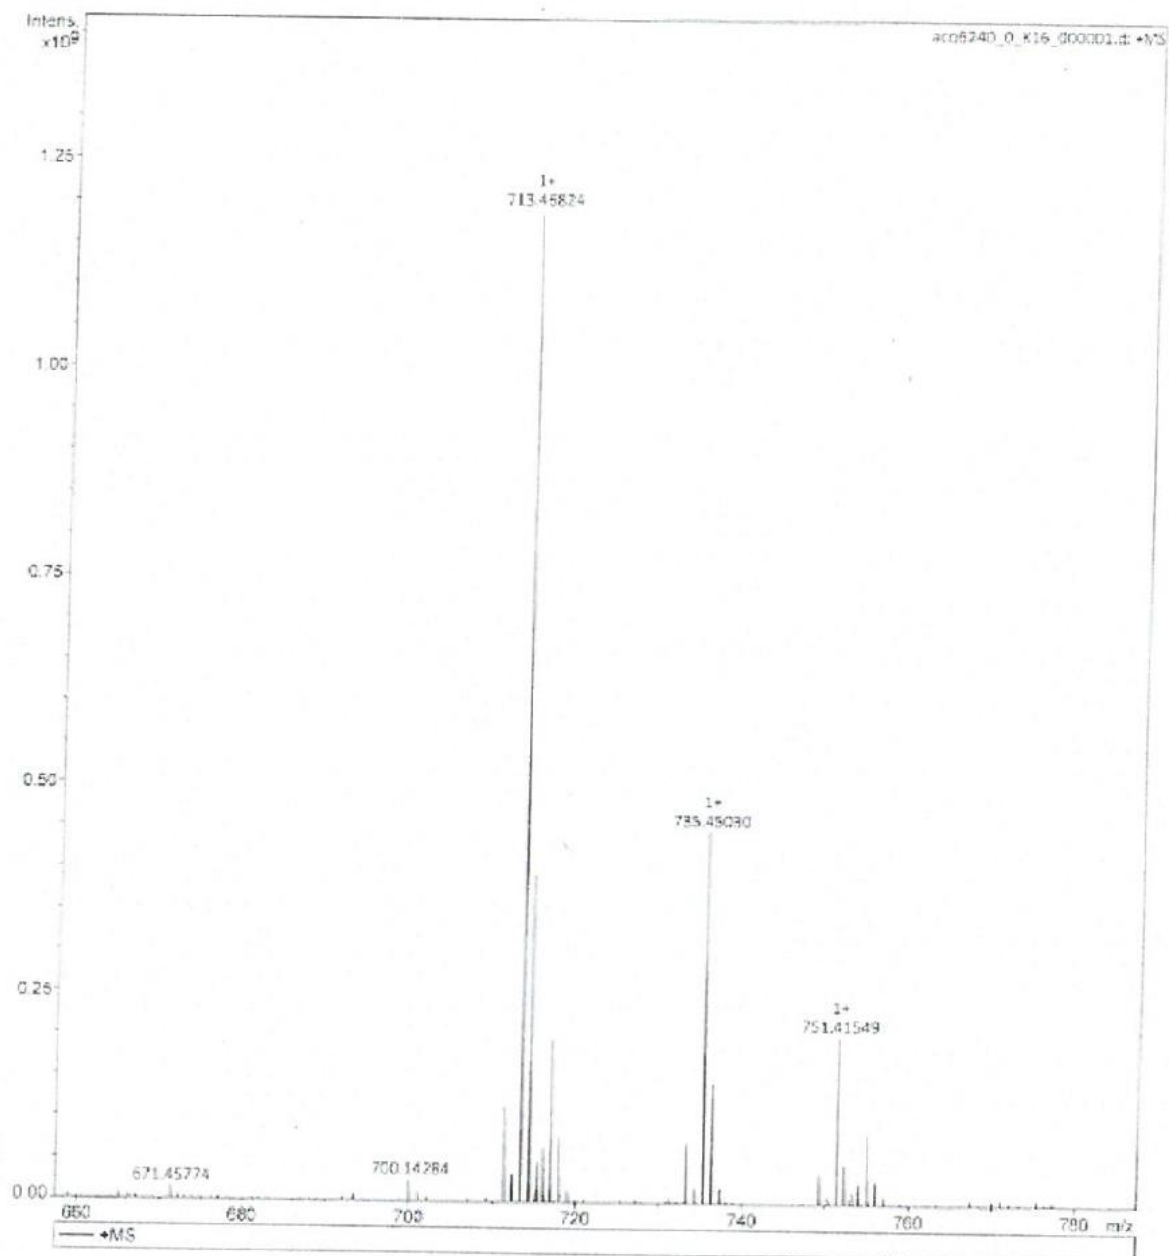

Figure SP47: Mass analysis (MALDI)(Matrix:Dithranol). m/z  $[M+H]^+$  calcd for  $[C_{32}H_{61}N_{10}O_6]^+$ : 713.4686; Found: 713.4682; m/z  $[M+Na]^+$  calcd for  $[C_{32}H_{60}N_{10}NaO_6]^+$ : 735.4488; Found: 735.4503; m/z  $[M+K]^+$  calcd for  $[C_{32}H_{60}N_{10}KO_6]^+$ : 751.4227; Found: 751.4155

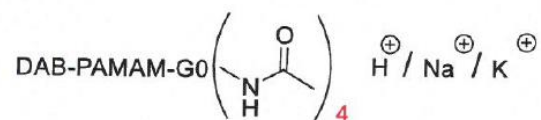

Figure S28: ESI-MS of DAB-PAMAM-G0-(Acetamide)<sub>4</sub> • 2HCl (5)

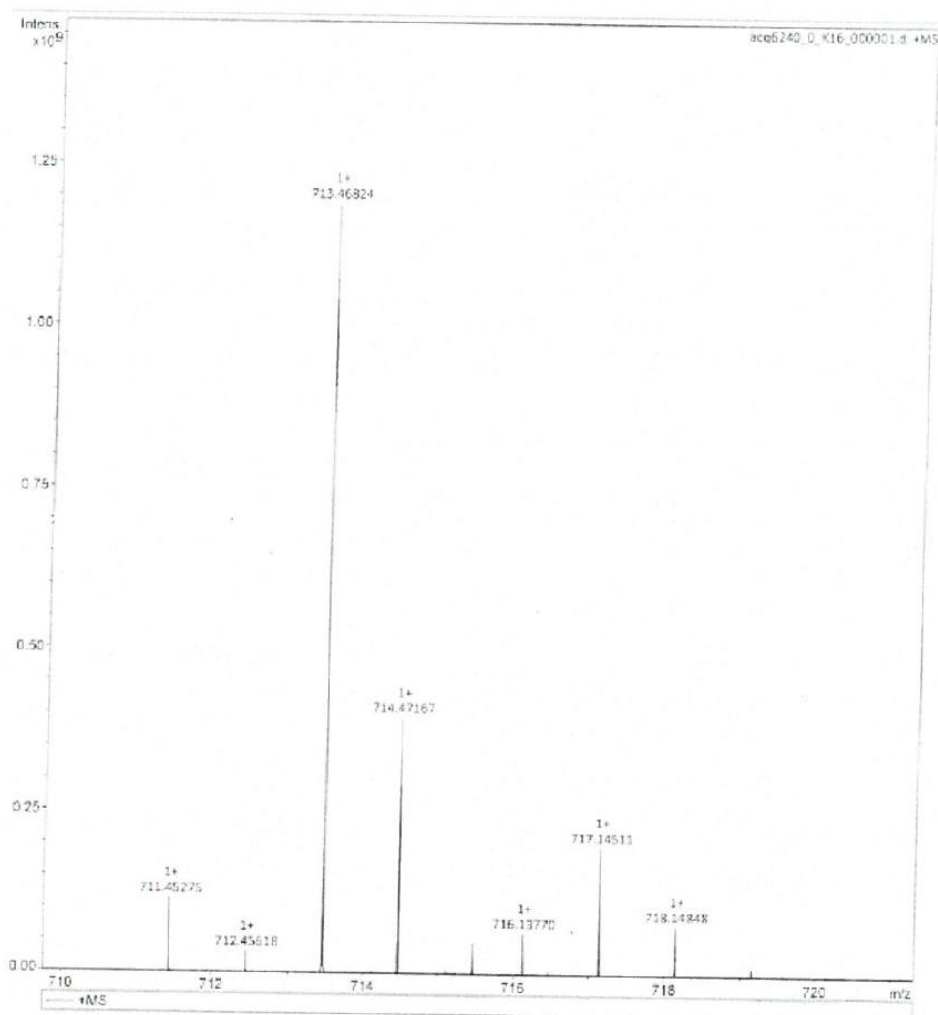

Figure SP48: Mass analysis (MALDI)(Matrix:Dithranol). m/z [M+H]<sup>+</sup> calcd for [C<sub>32</sub>H<sub>61</sub>N<sub>10</sub>O<sub>6</sub>]<sup>+</sup>: 713.4686; Found: 713.4682

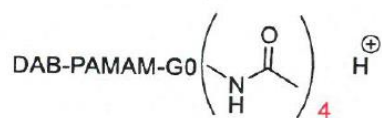

Chemical Formula: C<sub>32</sub>H<sub>61</sub>N<sub>10</sub>O<sub>8</sub><sup>+</sup>

Molecular Weight: 713.9015

m/z: 713.4668 (100.0%), 714.4702 (34.6%), 715.4735 (3.1%), 715.4735 (2.7%), 714.4639 (1.8%), 714.4639 (1.8%), 715.4711 (1.6%), 715.4672 (1.3%)

Figure S29:  $^1\text{H}$ -NMR (500 MHz in  $\text{CDCl}_3$ ) of Benzyl 7-(4-tert-butoxycarbonyl)piperazin-1-yl)-1-cyclopropyl-6-fluoro-4-oxo-1,4-dihydroquinoline-3-carboxylate (7)

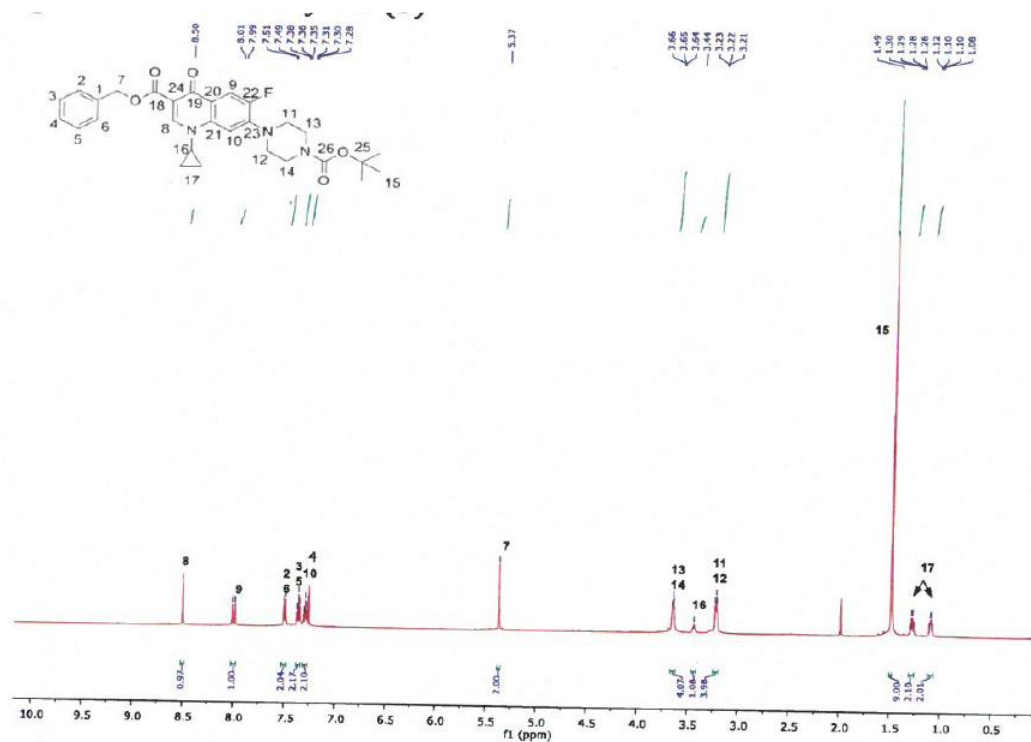

Figure S30: COSY-NMR (500 MHz in CDCl<sub>3</sub>) of Benzyl 7-(4-tert-butoxycarbonyl)piperazin-1-yl)-1-cyclopropyl-6-fluoro-4-oxo-1,4-dihydroquinoline-3-carboxylate (7)

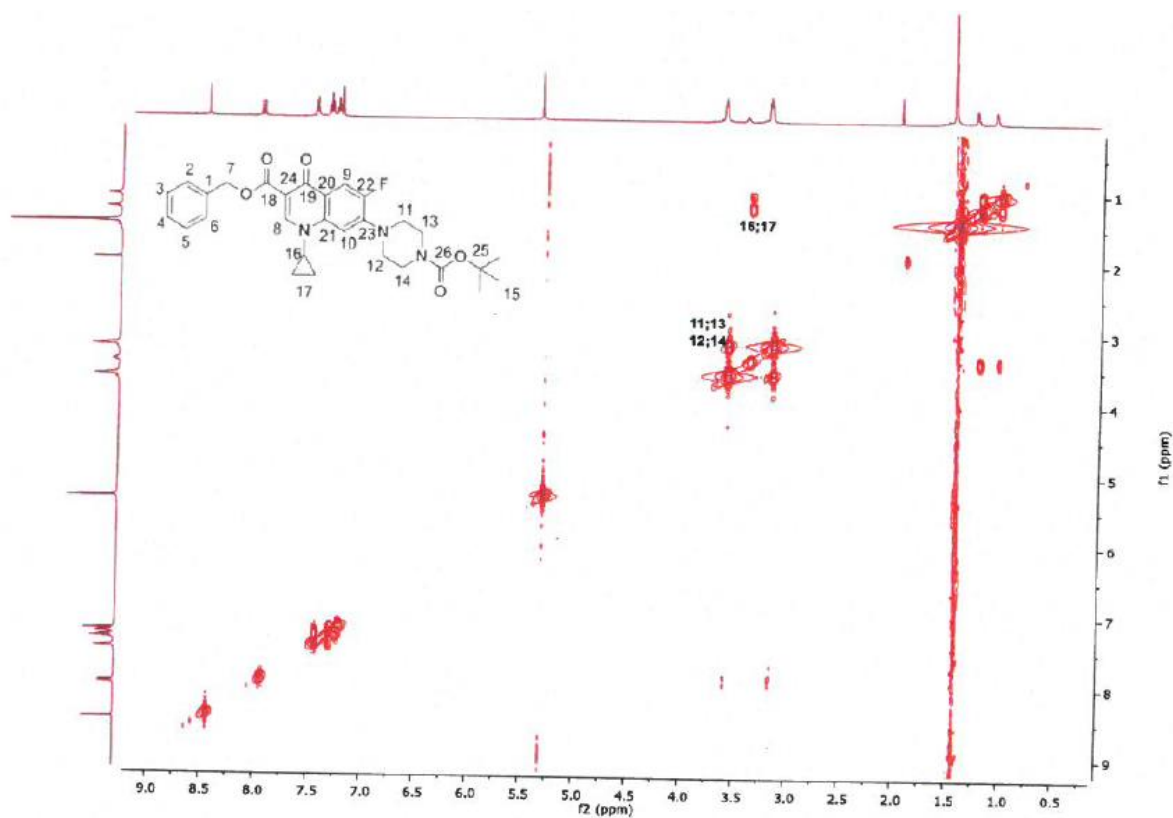

Figure S30:  $^{13}\text{C}$ -NMR (125 MHz in  $\text{CDCl}_3$ ) of Benzyl 7-(4-tert-butoxycarbonyl)piperazin-1-yl)-1-cyclopropyl-6-fluoro-4-oxo-1,4-dihydroquinoline-3-carboxylate (7)

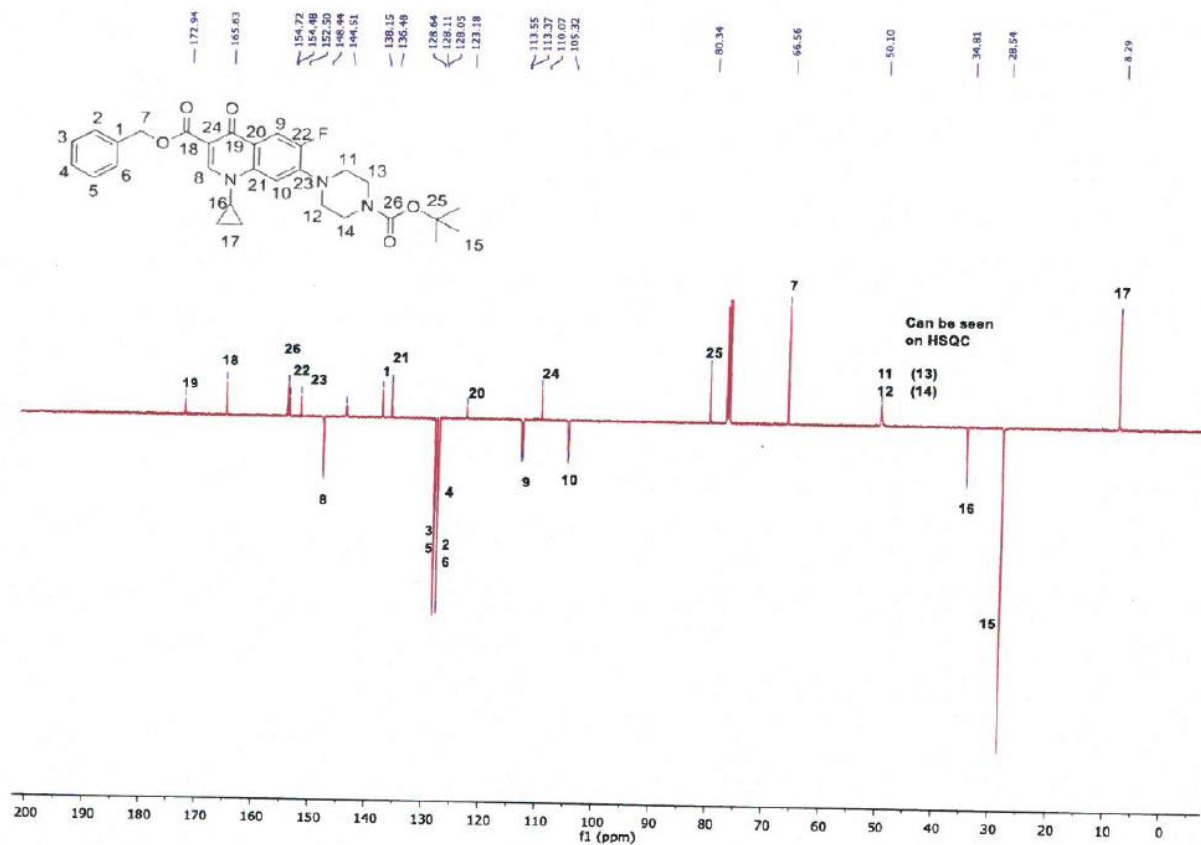

Figure S31: HSQC-NMR (125 & 500 MHz in CDCl<sub>3</sub>) of Benzyl 7-(4-tert-butoxycarbonyl)piperazin-1-yl)-1-cyclopropyl-6-fluoro-4-oxo-1,4-dihydroquinoline-3-carboxylate (7)

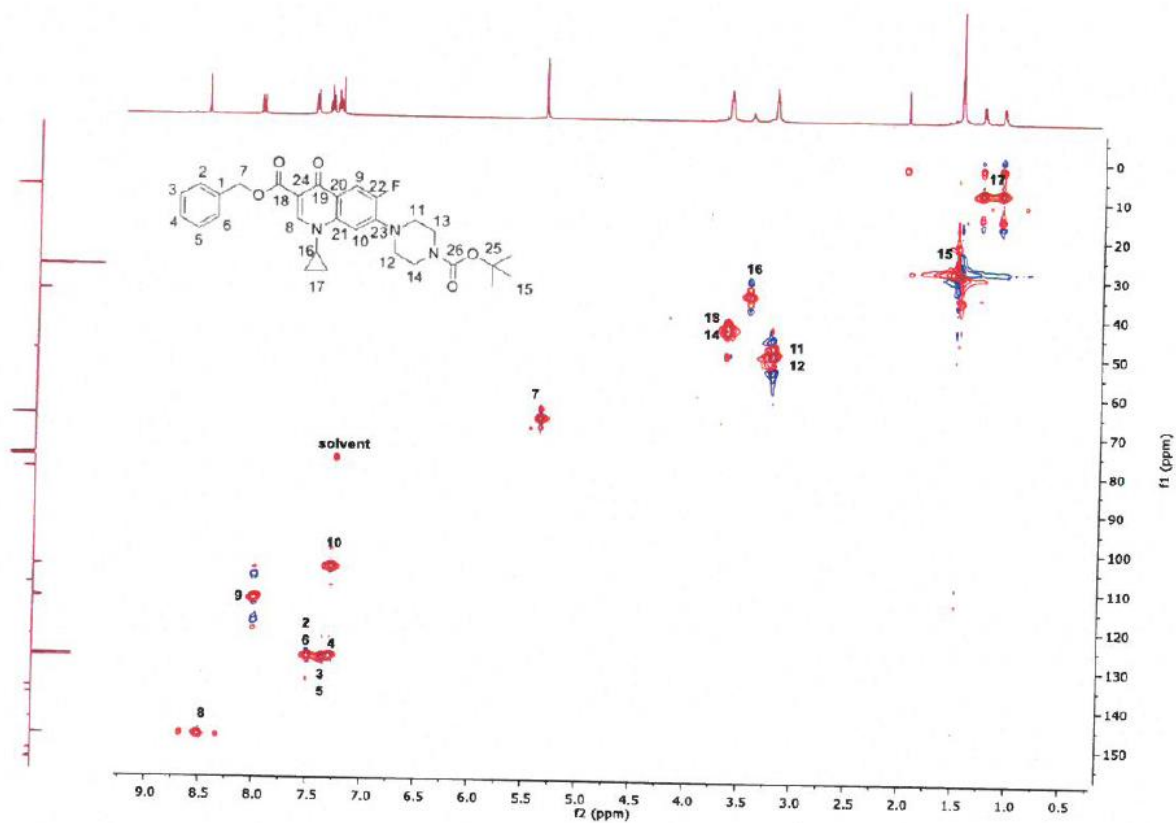

Figure S32:  $^{19}\text{F}$ -NMR (470 MHz in  $\text{CDCl}_3$ ) of Benzyl 7-(4-tert-butoxycarbonyl)piperazin-1-yl)-1-cyclopropyl-6-fluoro-4-oxo-1,4-dihydroquinoline-3-carboxylate (7)

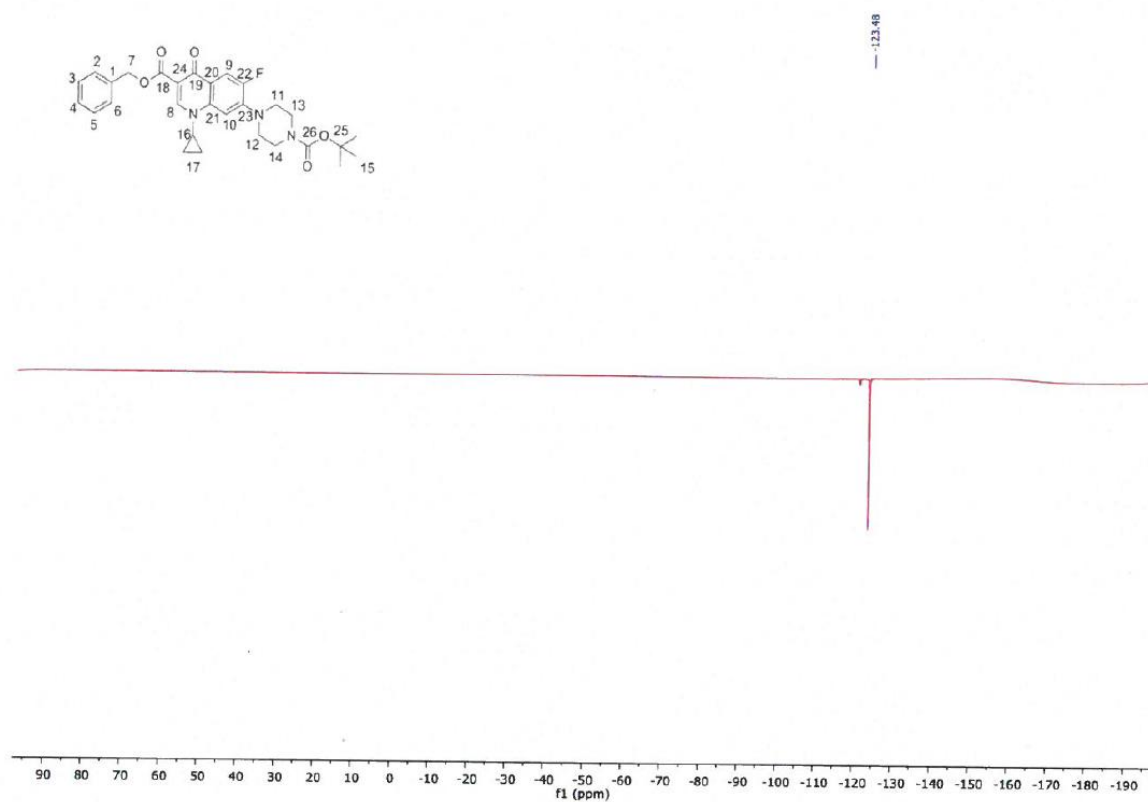

Figure S33: ESI-MS of Benzyl 7-(4-tert-butoxycarbonyl)piperazin-1-yl)-1-cyclopropyl-6-fluoro-4-oxo-1,4-dihydroquinoline-3-carboxylate (7)

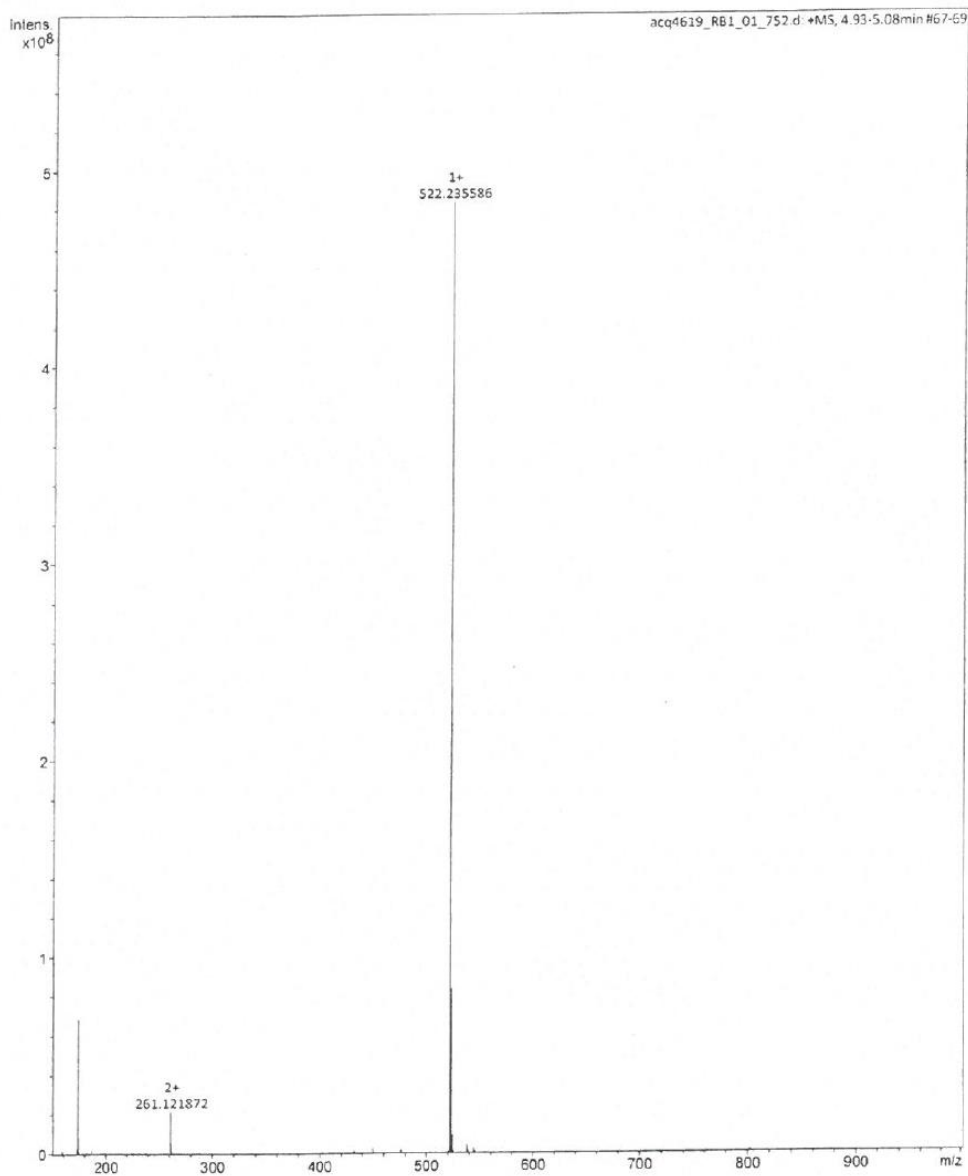

Figure SP10: Mass analysis (ESI)(MeOH+0.1%TFA).  $m/z$   $[M+2H]^+^{2+}$  calcd for  $[C_{29}H_{34}FN_3O_5]^{2+}$ : 261.6236;  
Found: 261.1219

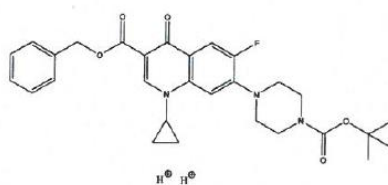

Chemical Formula:  $C_{29}H_{34}FN_3O_5^{2+}$

Molecular Weight: 523.6043

$m/z$ : 261.6236 (100.0%), 262.1253 (31.4%), 262.6269 (4.7%), 262.1221 (1.1%), 262.6257 (1.0%)

Figure S34: ESI-MS of Benzyl 7-(4-tert-butoxycarbonyl)piperazin-1-yl)-1-cyclopropyl-6-fluoro-4-oxo-1,4-dihydroquinoline-3-carboxylate (7)

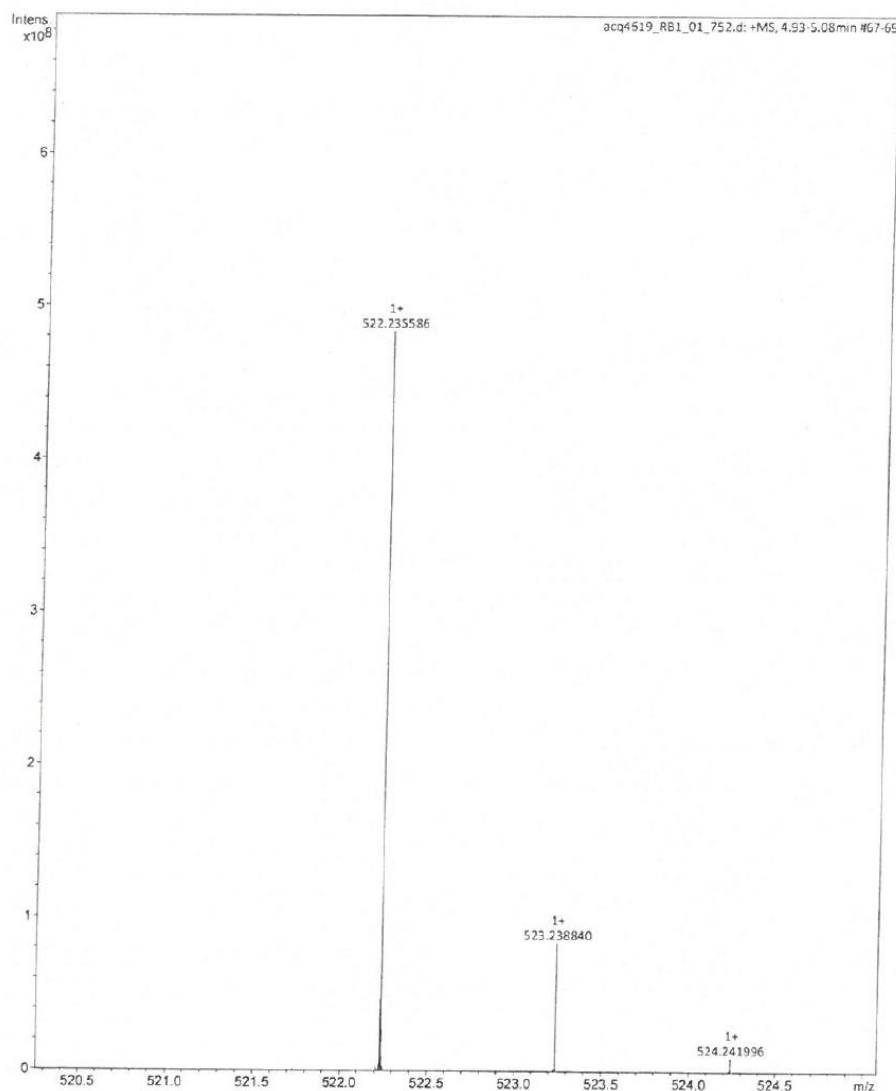

Figure SP11: Mass analysis (ESI)(MeOH+0.1%TFA).  $m/z$   $[M+H]^+$  calcd for  $[C_{29}H_{33}FN_3O_5]^+$ : 522.2399;  
Found: 522.2356

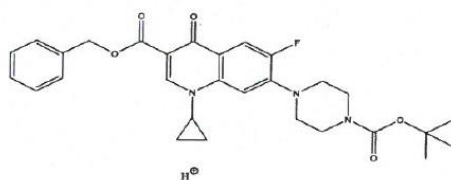

Chemical Formula:  $C_{29}H_{33}FN_3O_5^+$

Molecular Weight: 522.5969

$m/z$ : 522.2399 (100.0%), 523.2432 (31.4%), 524.2466 (2.7%), 524.2466 (2.0%), 523.2369 (1.1%),  
524.2441 (1.0%)

**Figure S35:**  $^1\text{H}$ -NMR (500 MHz in  $\text{CDCl}_3$ ) of **Benzyl 1-cyclopropyl-6-fluoro-4-oxo-piperazin-1-yl)-1,4-dihydroquinoline-3-carboxylate (8)**

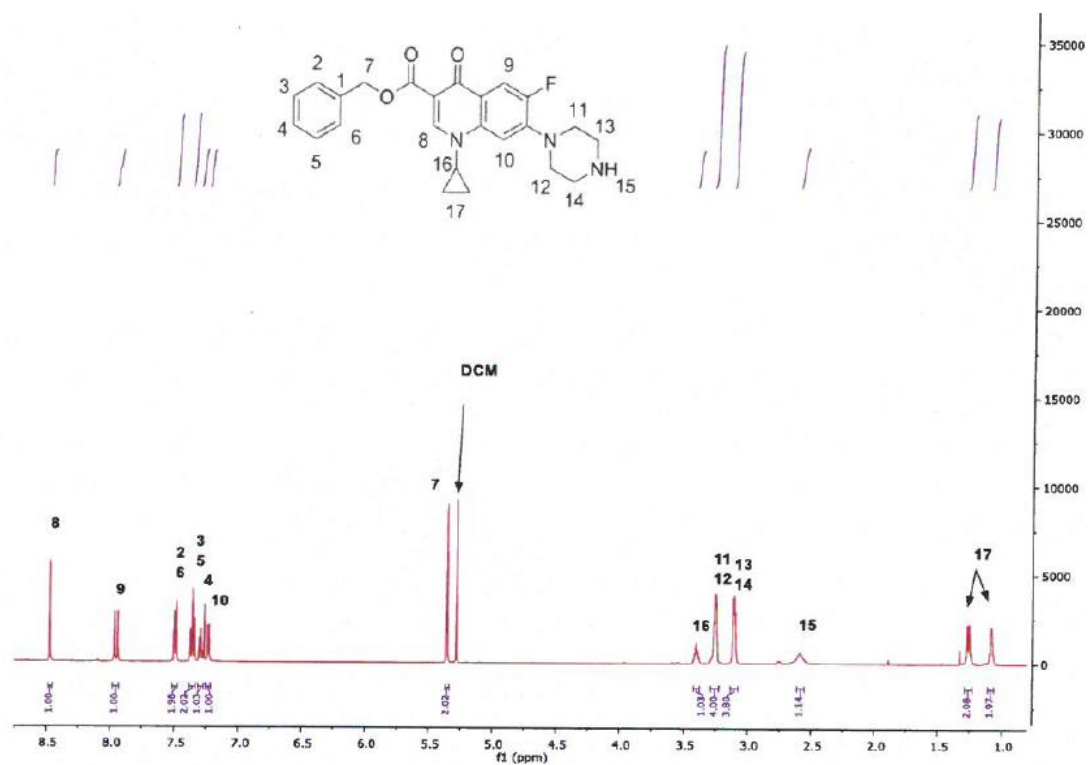

**Figure S36:** COSY-NMR (500 MHz in CDCl<sub>3</sub>) of **Benzyl 1-cyclopropyl-6-fluoro-4-oxo-piperazin-1-yl)-1,4-dihydroquinoline-3-carboxylate (8)**

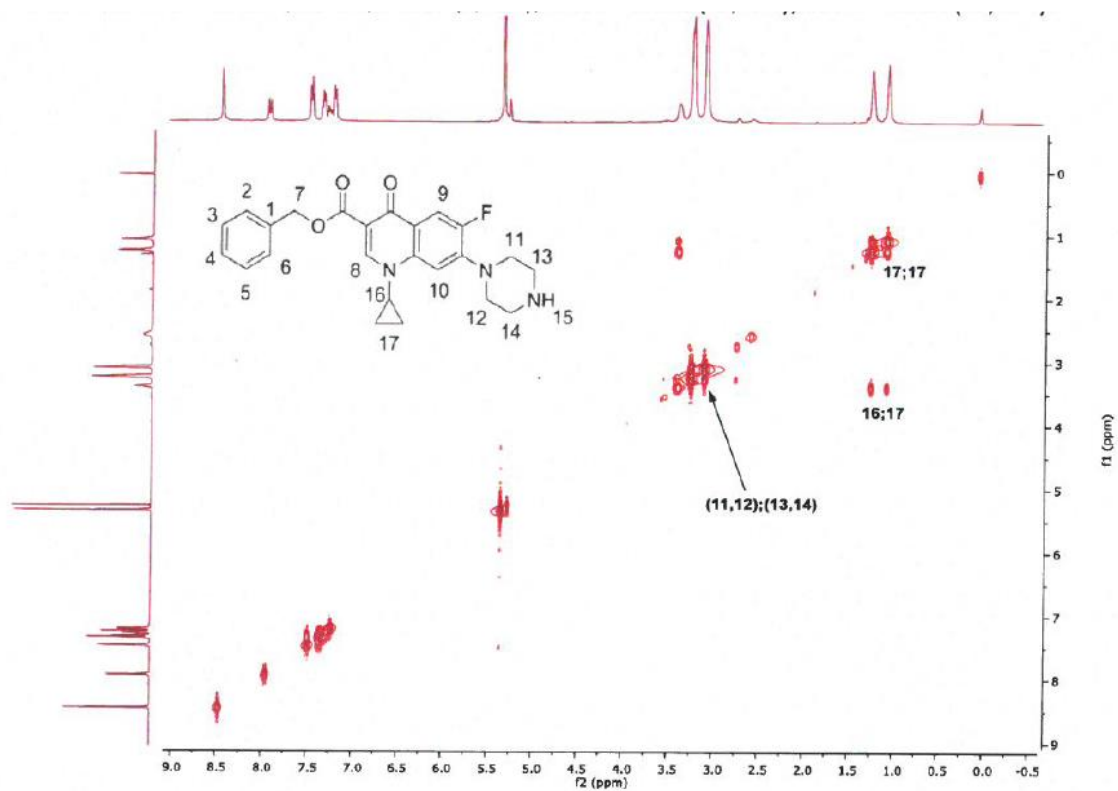

**Figure S37:**  $^{13}\text{C}$ -NMR (125 MHz in  $\text{CDCl}_3$ ) of **Benzyl 1-cyclopropyl-6-fluoro-4-oxo-piperazin-1-yl)-1,4-dihydroquinoline-3-carboxylate (8)**

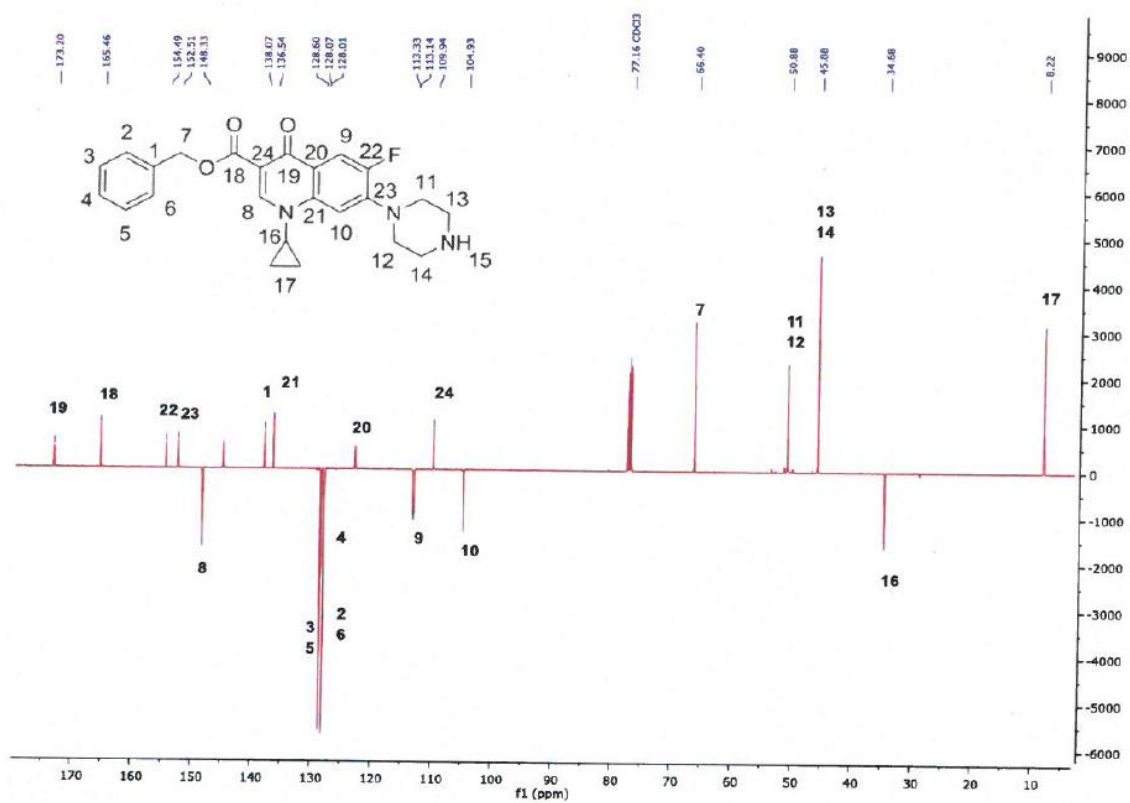

**Figure S38:** HSQC-NMR (125 & 500 MHz in CDCl<sub>3</sub>) of **Benzyl 1-cyclopropyl-6-fluoro-4-oxo-piperazin-1-yl)-1,4-dihydroquinoline-3-carboxylate (8)**

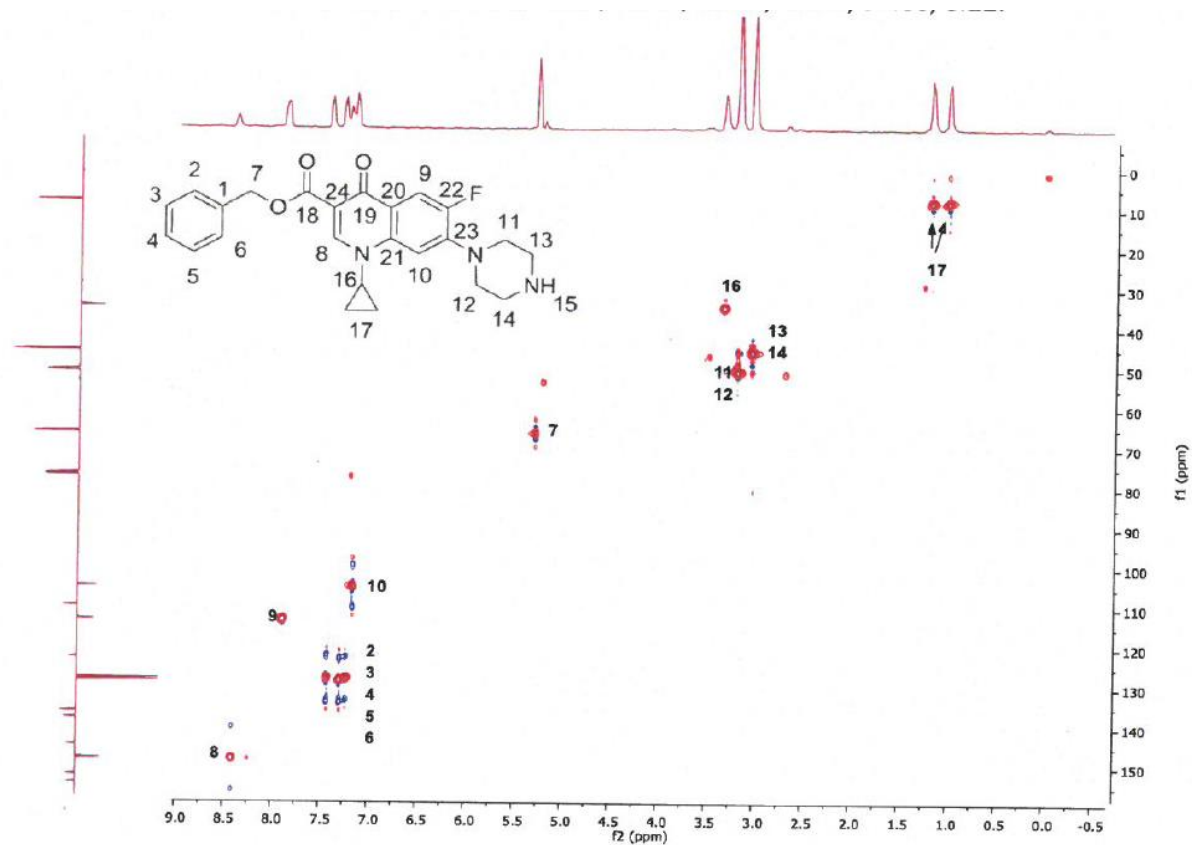

**Figure S39:**  $^{19}\text{F}$ -NMR (470 MHz in  $\text{CDCl}_3$ ) of **Benzyl 1-cyclopropyl-6-fluoro-4-oxo-piperazin-1-yl)-1,4-dihydroquinoline-3-carboxylate (8)**

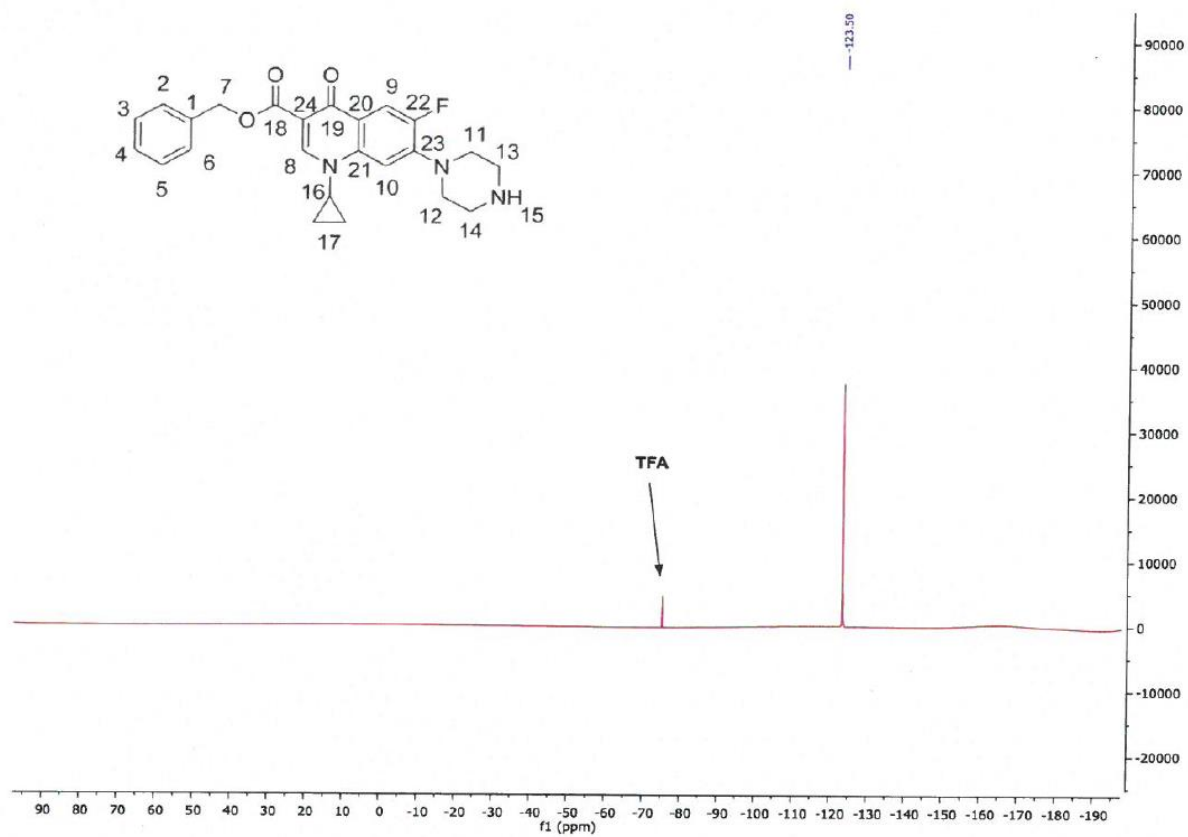

**Figure S40:** ESI-MS of **Benzyl 1-cyclopropyl-6-fluoro-4-oxo-piperazin-1-yl)-1,4-dihydroquinoline-3-carboxylate (8)**

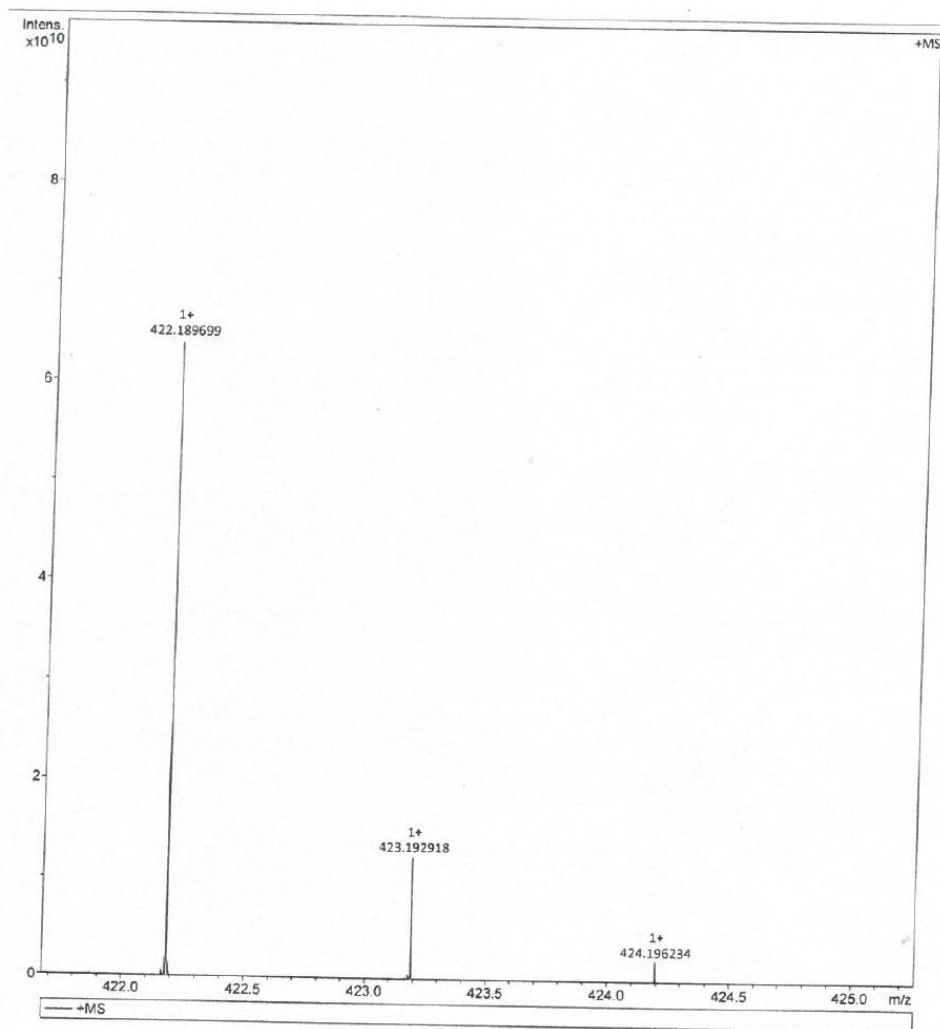

**Figure SP17:** Mass analysis (ESI)(MeOH+0.1%TFA).  $m/z$   $[M+H]^+$  calcd for  $[C_{24}H_{25}FN_3O_3]^+$ : 422.1875;  
Found: 422.1897

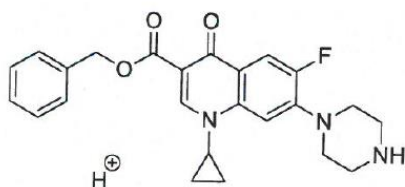

Chemical Formula:  $C_{24}H_{25}FN_3O_3^+$

Molecular Weight: 422.4715

$m/z$ : 422.1875 (100.0%), 423.1908 (26.0%), 424.1942 (3.2%), 423.1845 (1.1%)

**Figure S41:**  $^1\text{H}$ -NMR (500 MHz in  $\text{CDCl}_3$ ) of **Benzyl 1-cyclopropyl-6-fluoro-4-oxo-7-(4-(3-oxo-3-phenoxypropyl)piperazin-1-yl)-1,4-dihydroquinoline-3-carboxylate (9)**

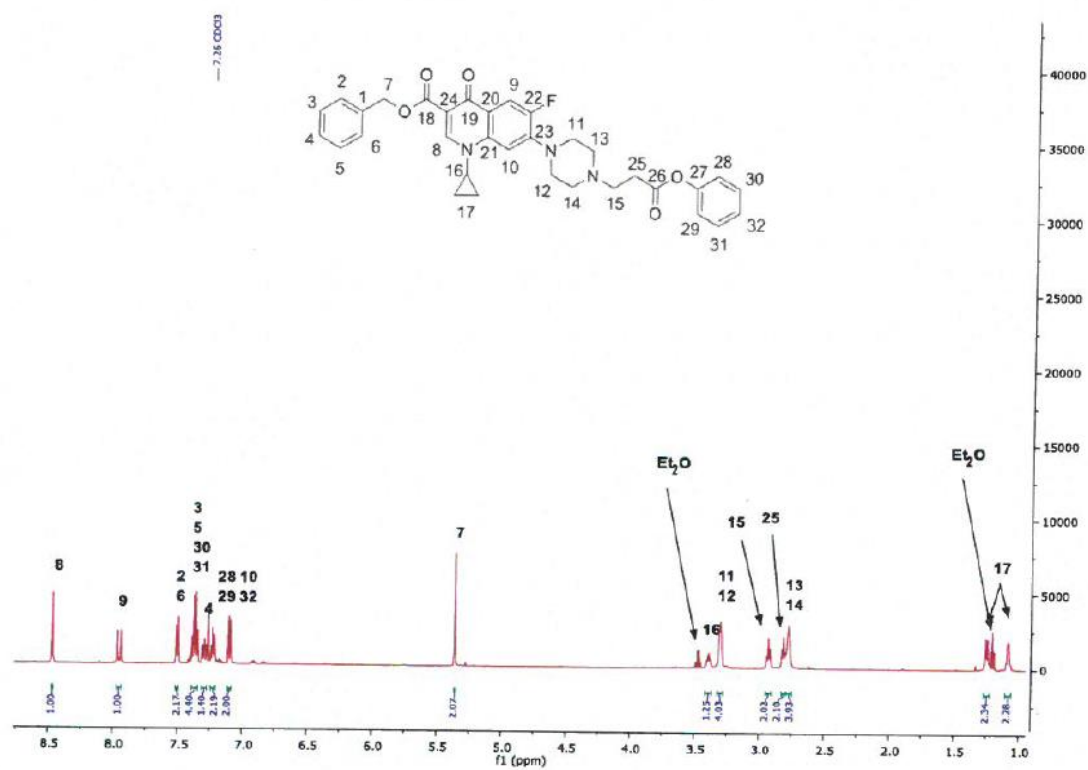

**Figure S42:** COSY-NMR (500 MHz in CDCl<sub>3</sub>) of **Benzyl 1-cyclopropyl-6-fluoro-4-oxo-7-(4-(3-oxo-3-phenoxypropyl)piperazin-1-yl)-1,4-dihydroquinoline-3-carboxylate (9)**

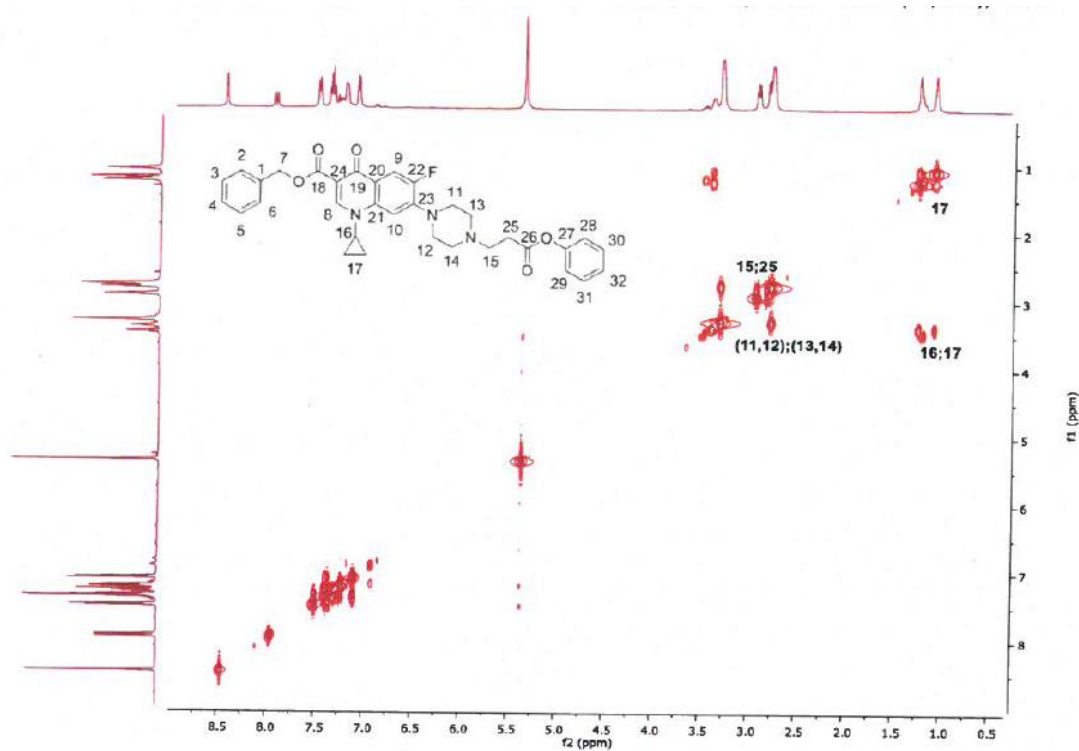

**Figure S43:**  $^{13}\text{C}$ -NMR (125 MHz in  $\text{CDCl}_3$ ) of **Benzyl 1-cyclopropyl-6-fluoro-4-oxo-7-(4-(3-oxo-3-phenoxypropyl)piperazin-1-yl)-1,4-dihydroquinoline-3-carboxylate (9)**

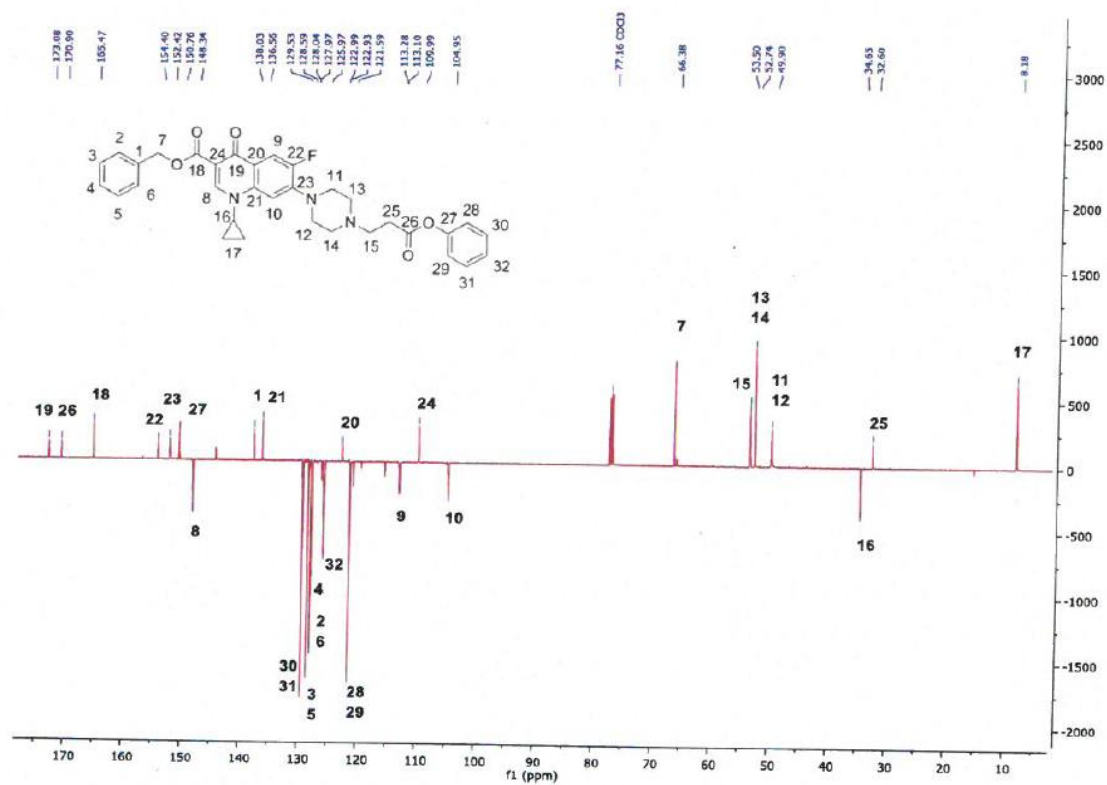

**Figure S44:** HSQC-NMR (125 & 500 MHz in CDCl<sub>3</sub>) of Benzyl 1-cyclopropyl-6-fluoro-4-oxo-7-(4-(3-oxo-3-phenoxypropyl)piperazin-1-yl)-1,4-dihydroquinoline-3-carboxylate (9)

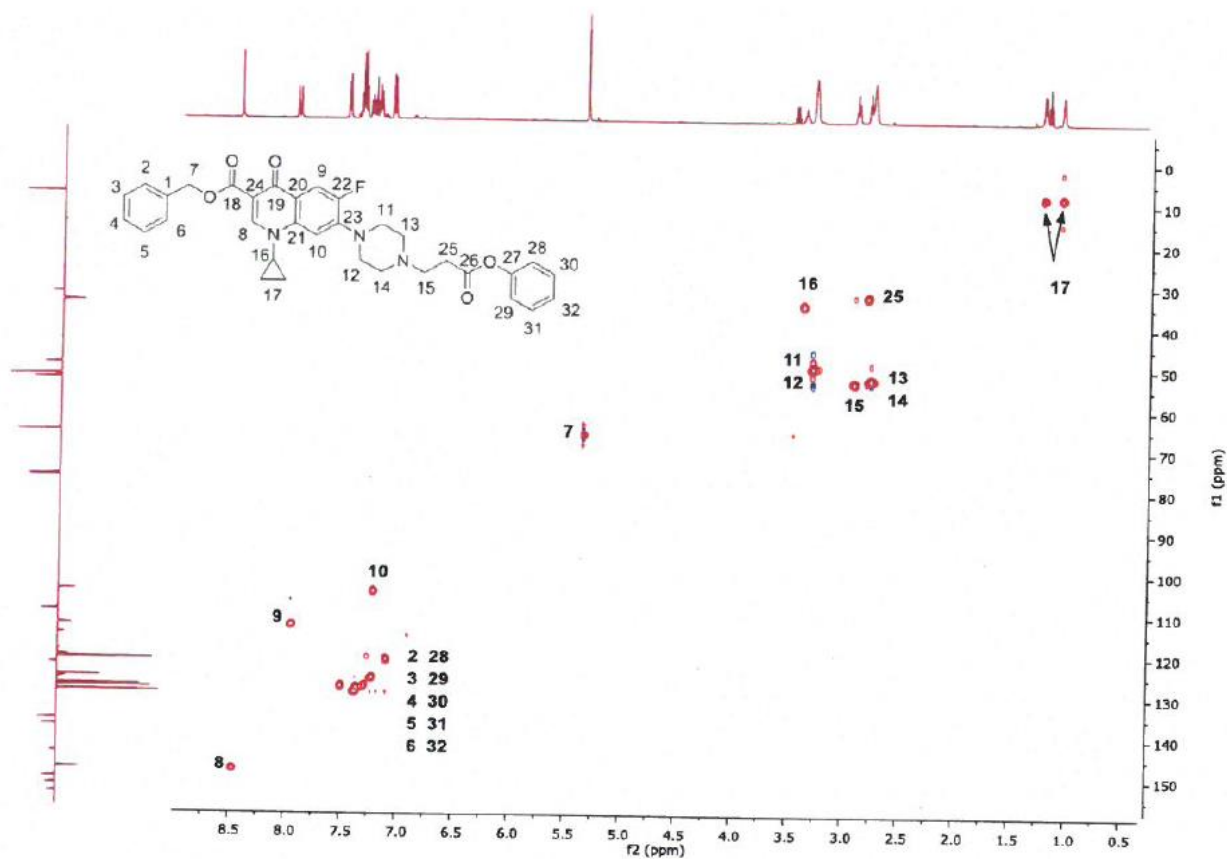

**Figure S45:**  $^{19}\text{F}$ -NMR (470 MHz in  $\text{CDCl}_3$ ) of **Benzyl 1-cyclopropyl-6-fluoro-4-oxo-7-(4-(3-oxo-3-phenoxypropyl)piperazin-1-yl)-1,4-dihydroquinoline-3-carboxylate (9)**

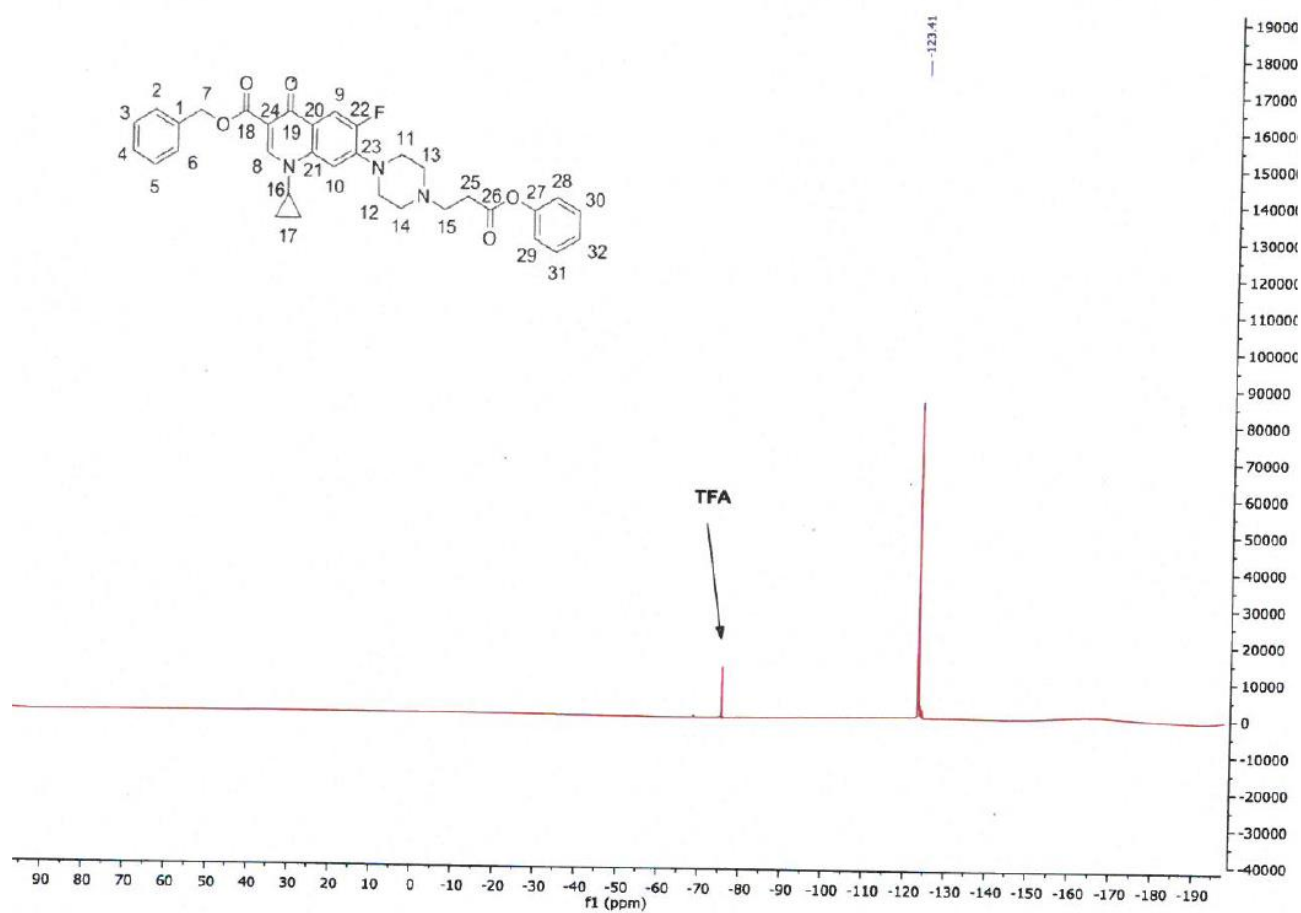

**Figure S46:** ESI-MS of Benzyl 1-cyclopropyl-6-fluoro-4-oxo-7-(4-(3-oxo-3-phenoxypropyl)piperazin-1-yl)-1,4-dihydroquinoline-3-carboxylate (9)

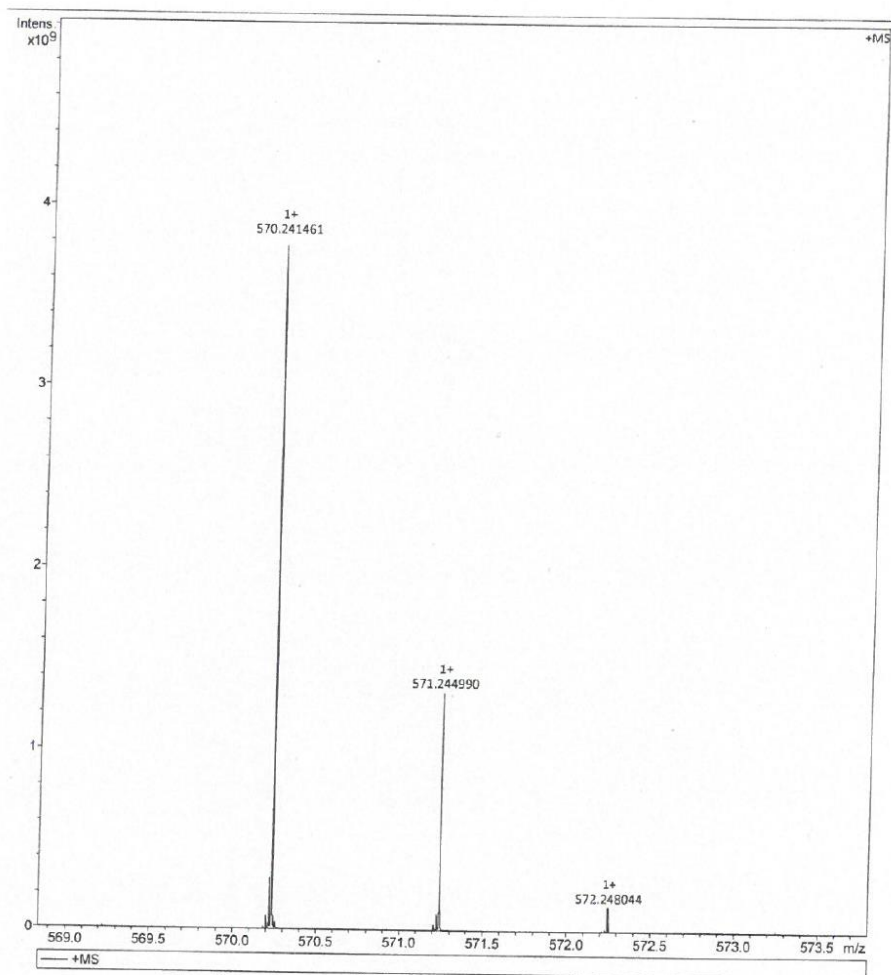

**Figure SP23:** Mass analysis (MALDI)(Matrix:Dithranol). m/z [M+H]<sup>+</sup> calcd for [C<sub>33</sub>H<sub>33</sub>FN<sub>3</sub>O<sub>5</sub>]<sup>+</sup>: 570.2399; Found: 570.2415

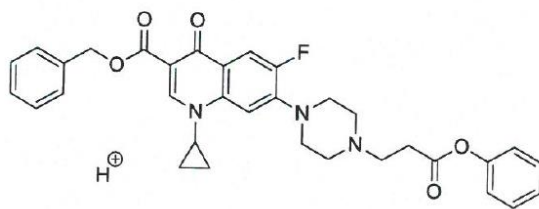

Chemical Formula: C<sub>33</sub>H<sub>33</sub>FN<sub>3</sub>O<sub>5</sub><sup>+</sup>

Molecular Weight: 570.6301

m/z: 570.2399 (100.0%), 571.2433 (35.7%), 572.2466 (6.2%), 571.2370 (1.1%), 572.2442 (1.0%)

**Figure S47:** ESI-MS of Benzyl 1-cyclopropyl-6-fluoro-4-oxo-7-(4-(3-oxo-3-phenoxypropyl)piperazin-1-yl)-1,4-dihydroquinoline-3-carboxylate (9)

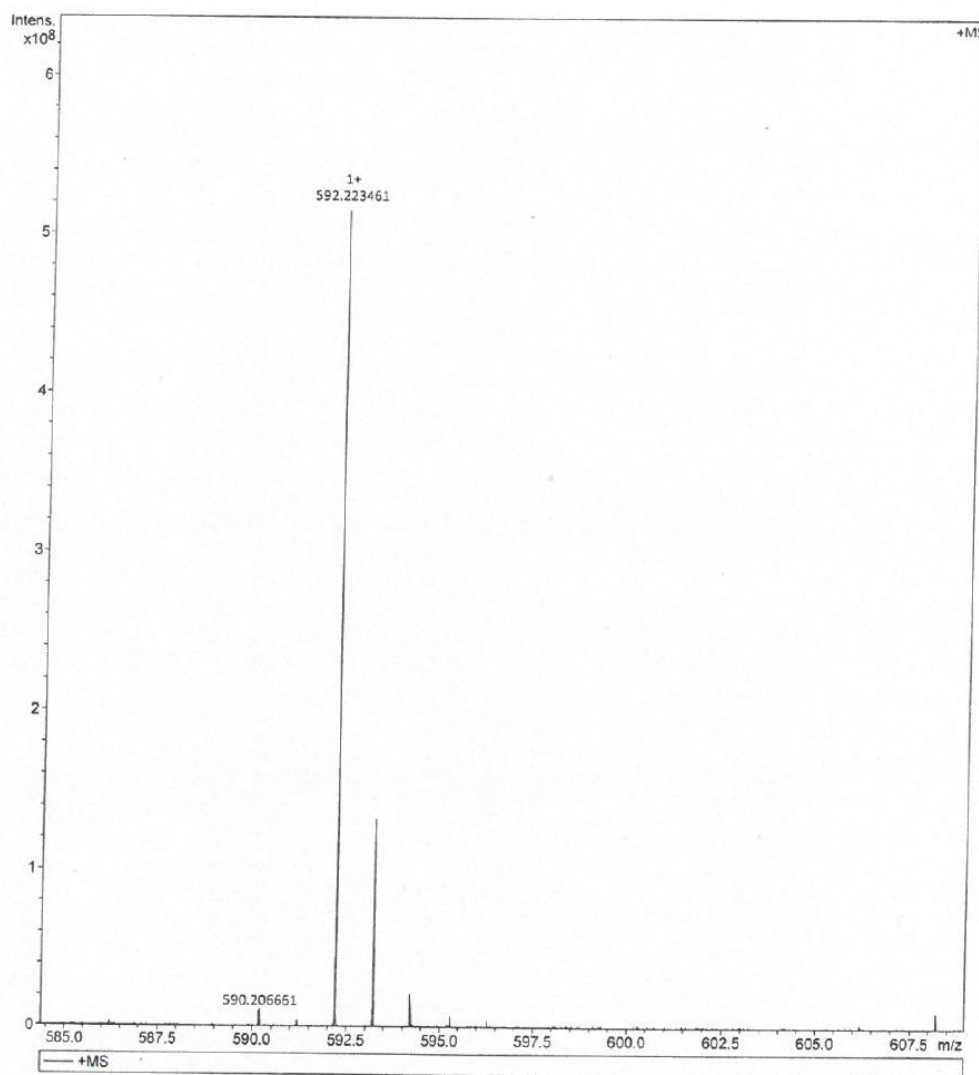

**Figure SP24:** Mass analysis (MALDI)(Matrix:Dithranol). m/z  $[M+Na]^+$  calcd for  $[C_{33}H_{32}FN_3NaO_5]^+$ : 592.2219; Found: 592.2235

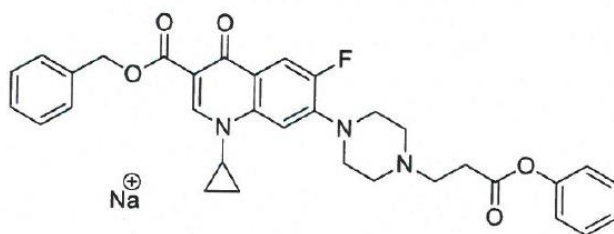

Chemical Formula:  $C_{33}H_{32}FN_3NaO_5^+$

Molecular Weight: 592.6119

m/z: 592.2219 (100.0%), 593.2252 (35.7%), 594.2286 (6.2%), 593.2189 (1.1%), 594.2261 (1.0%)

**Figure S48:** ESI-MS of Benzyl 1-cyclopropyl-6-fluoro-4-oxo-7-(4-(3-oxo-3-phenoxypropyl)piperazin-1-yl)-1,4-dihydroquinoline-3-carboxylate (9)

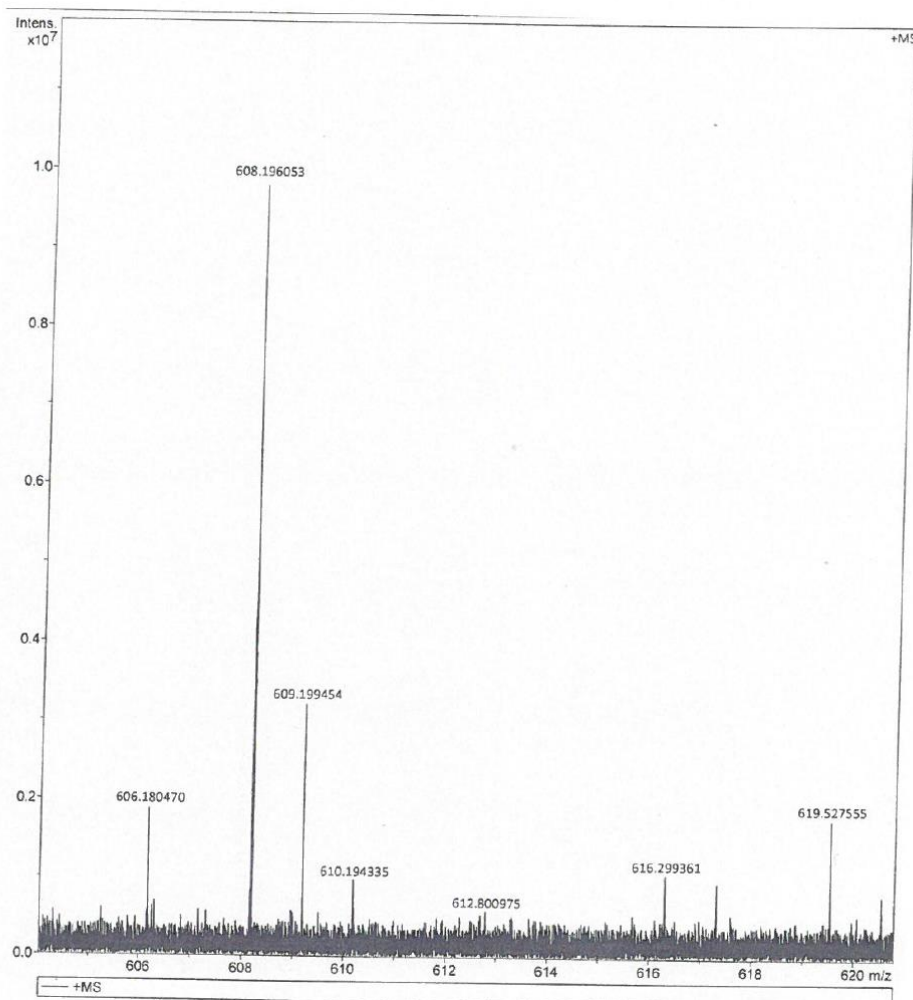

**Figure SP25:** Mass analysis (MALDI)(Matrix:Dithranol). m/z  $[M+K]^+$  calcd for  $[C_{33}H_{32}FKN_3O_5]^+$ : 608.7204; Found: 608.1961

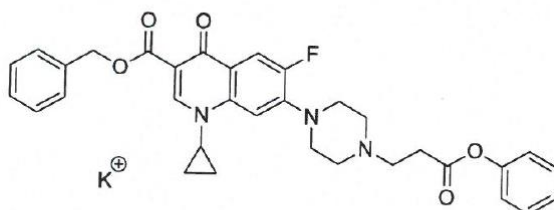

Chemical Formula:  $C_{33}H_{32}FKN_3O_5^+$

Molecular Weight: 608.7204

m/z: 608.1958 (100.0%), 609.1992 (35.7%), 610.1939 (7.2%), 610.2025 (6.2%), 611.1973 (2.6%), 609.1928 (1.1%), 610.2001 (1.0%)

**Figure S49:** ESI-MS of Benzyl 1-cyclopropyl-6-fluoro-4-oxo-7-(4-(3-oxo-3-phenoxypropyl)piperazin-1-yl)-1,4-dihydroquinoline-3-carboxylate (9)

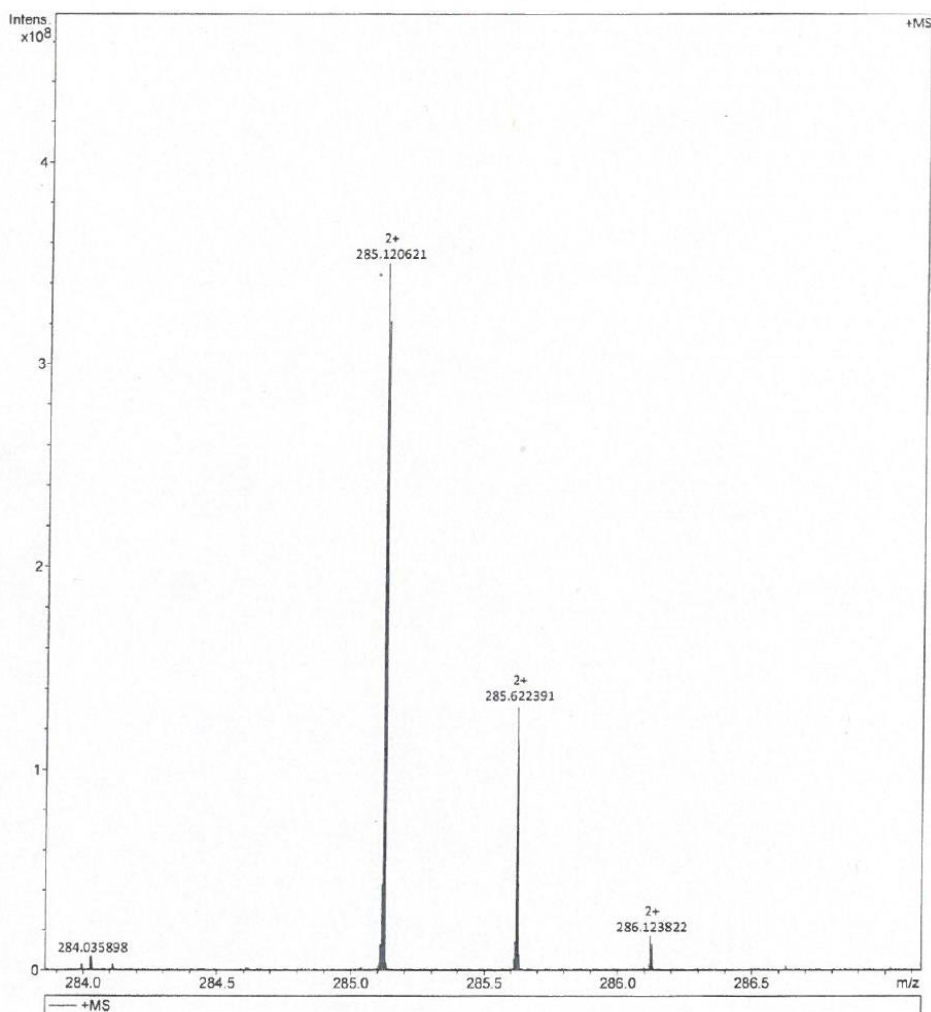

**Figure SP26:** Mass analysis (MALDI)(Matrix:Dithranol). m/z [M+2H]<sup>2+</sup> calcd for [C<sub>33</sub>H<sub>34</sub>FN<sub>3</sub>O<sub>5</sub>]<sup>2+</sup>: 285.6236;  
Found: 285.6224

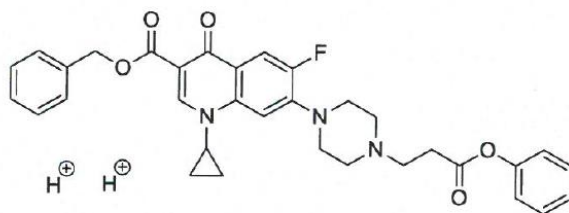

Chemical Formula: C<sub>33</sub>H<sub>34</sub>FN<sub>3</sub>O<sub>5</sub><sup>2+</sup>

Molecular Weight: 571.6375

m/z: 285.6236 (100.0%), 286.1253 (35.7%), 286.6270 (6.2%), 286.1221 (1.1%), 286.6257 (1.0%)

Figure S50:  $^1\text{H}$ -NMR (500 MHz in DMSO- $\text{D}_6$ ) of DAB-PAMAM-G0-(Cipro-Bn) $_4$  (10)

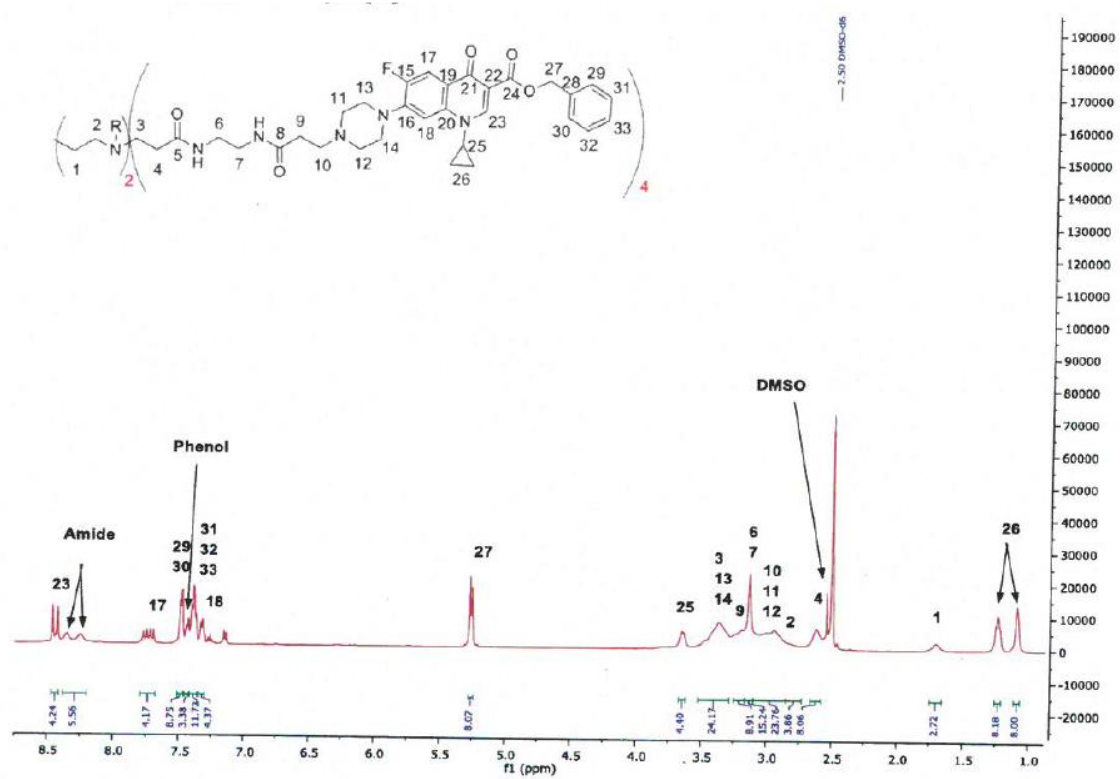

Figure S51: COSY-NMR (500 MHz in DMSO-D6) of DAB-PAMAM-G0-(Cipro-Bn)<sub>4</sub> (10)

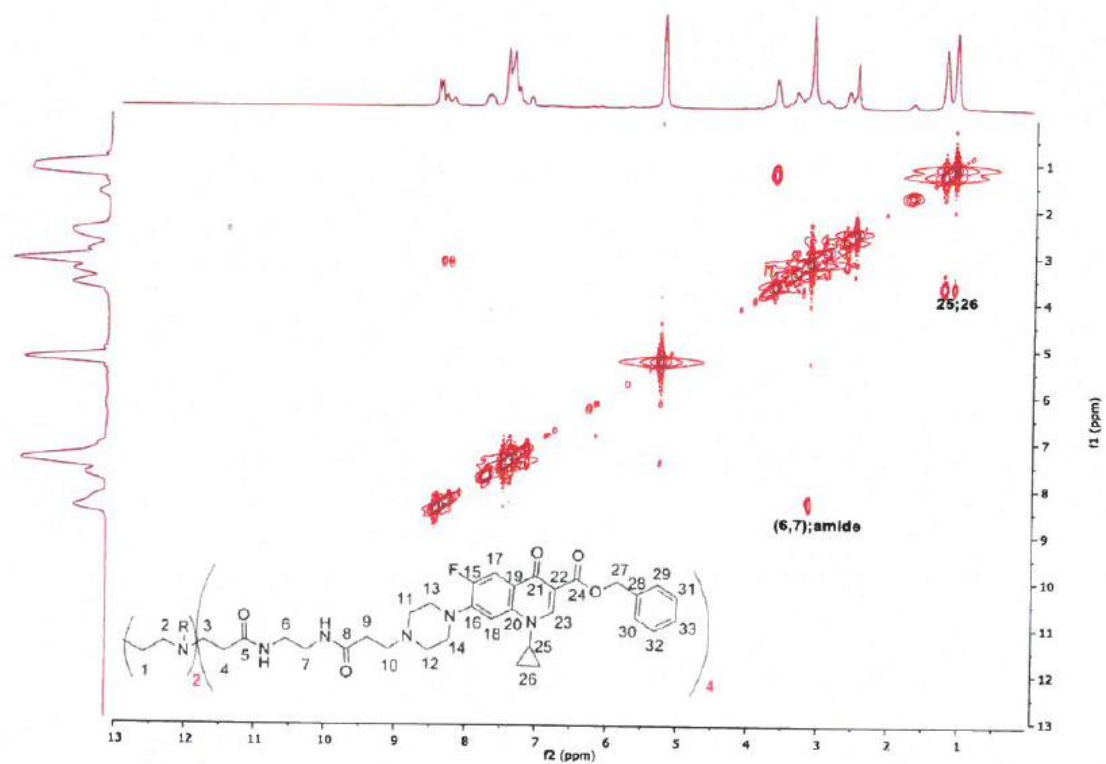

Figure S52:  $^{13}\text{C}$ -NMR (125 MHz in DMSO- $\text{D}_6$ ) of DAB-PAMAM-GO-(Cipro-Bn) $_4$  (10)

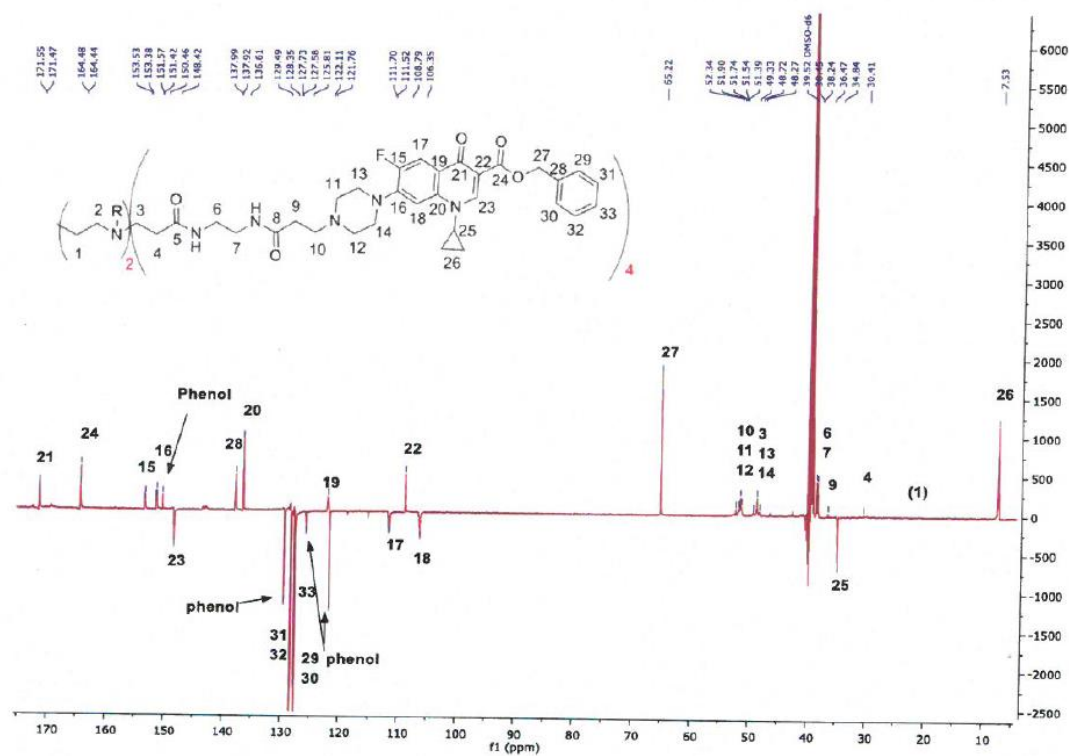

Figure S53: HSQC-NMR (125 & 500 MHz in DMSO-D<sub>6</sub>) of DAB-PAMAM-G0-(Cipro-Bn)<sub>4</sub> (10)

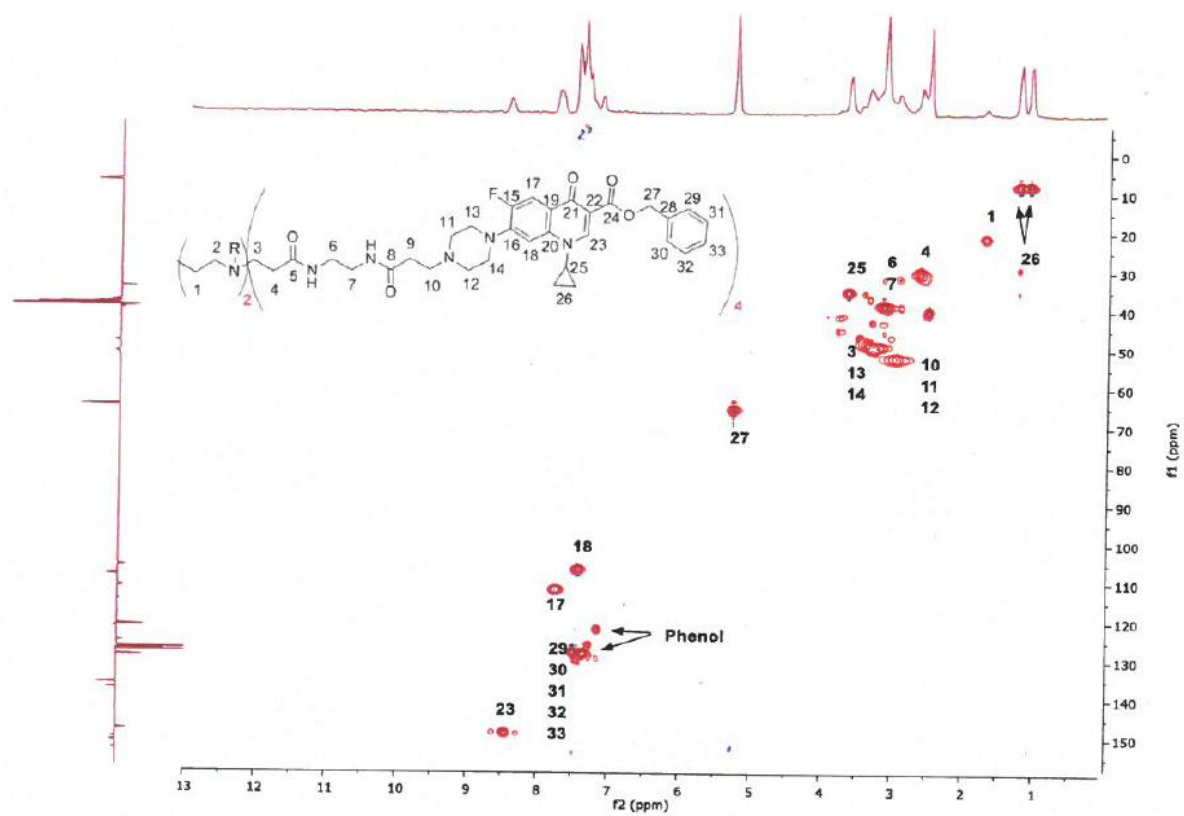

Figure S54:  $^{19}\text{F}$ -NMR (470 MHz in DMSO- $\text{D}_6$ ) of DAB-PAMAM-G0-(Cipro-Bn) $_4$  (10)

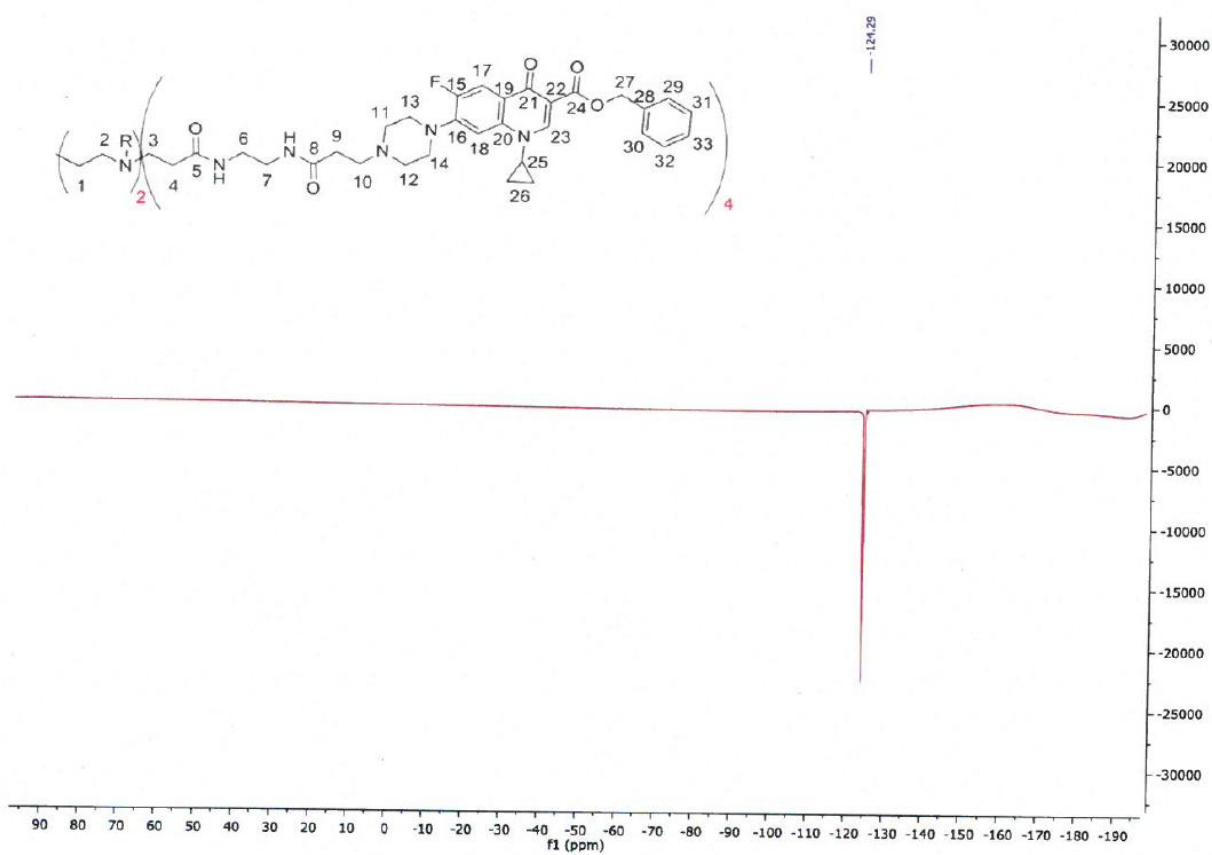

Figure S55: ESI-MS of DAB-PAMAM-G0-(Cipro-Bn)<sub>4</sub> (10)

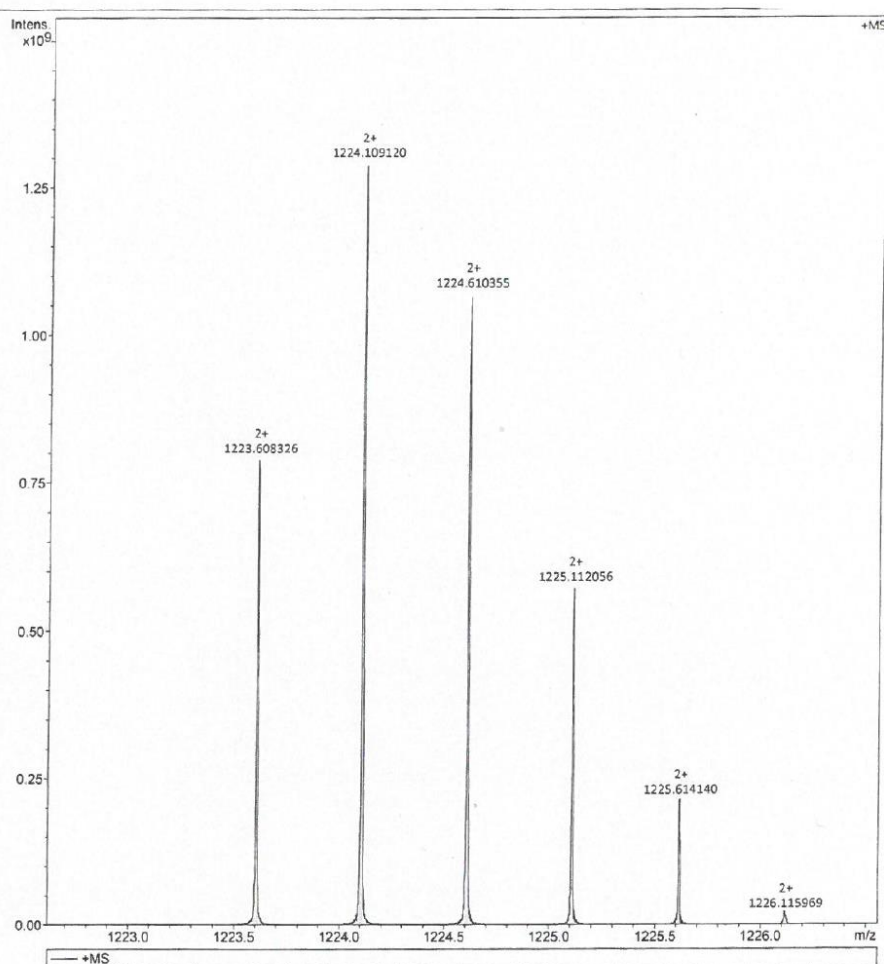

Figure SP32: Mass analysis (ESI)(MeOH+0.1%Formic acid).  $m/z$   $[M+2H^+]^{2+}$  calcd for  $[C_{132}H_{158}F_4N_{22}O_{20}]^{2+}$ : 1224.0991; Found: 1224.1091

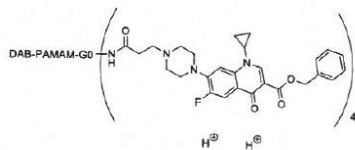

Chemical Formula:  $C_{132}H_{158}F_4N_{22}O_{20}^{2+}$

Molecular Weight: 2448.7948

$m/z$ : 1224.0991 (100.0%), 1224.6008 (70.8%), 1223.5974 (70.0%), 1225.1025 (33.2%), 1225.6041 (11.6%), 1224.5976 (8.1%), 1225.0993 (5.8%), 1224.0959 (5.7%), 1225.1012 (4.1%), 1226.1058 (3.2%), 1225.6029 (2.9%), 1224.5995 (2.9%), 1225.6010 (2.7%), 1224.6022 (1.8%), 1226.1046 (1.4%), 1225.1039 (1.3%), 1224.1006 (1.3%)

Figure S56: ESI-MS of DAB-PAMAM-G0-(Cipro-Bn)<sub>4</sub> (10)

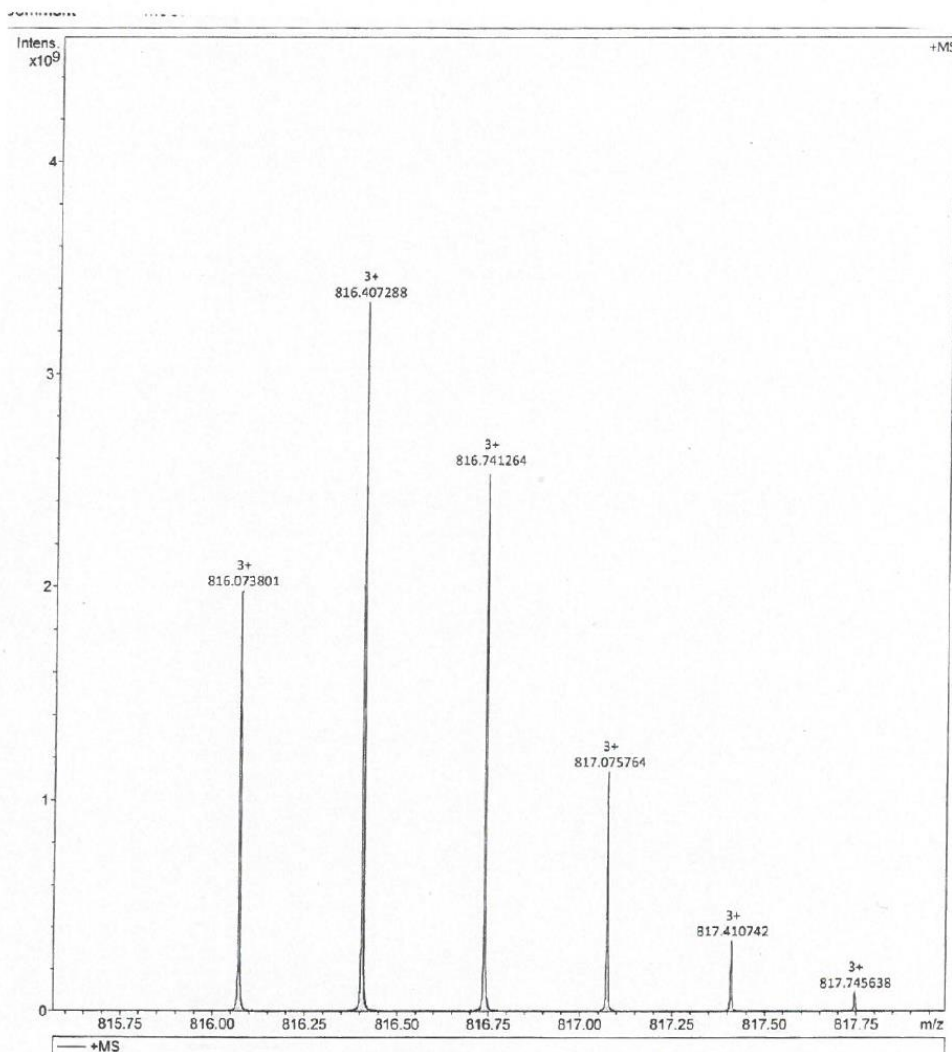

Figure SP33: Mass analysis (ESI)(MeOH+0.1%Formic acid).  $m/z$   $[M+3H]^{3+}$  calcd for  $[C_{132}H_{159}F_4N_{22}O_{20}]^{3+}$ : 816.4018;

Found: 816.4073

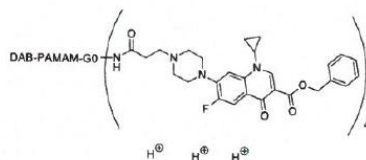

Chemical Formula:  $C_{132}H_{159}F_4N_{22}O_{20}^{3+}$

Molecular Weight: 2449.8022

$m/z$ : 816.4018 (100.0%), 816.7363 (70.8%), 816.0674 (70.0%), 817.0707 (33.2%), 817.4052 (11.6%), 816.7342 (8.1%), 817.0686 (5.8%), 816.3997 (5.7%), 817.0699 (4.1%), 817.7396 (3.2%), 817.4044 (2.9%), 816.7355 (2.9%), 817.4031 (2.7%), 816.7372 (1.8%), 817.7388 (1.4%), 817.0717 (1.3%), 816.4028 (1.3%)

Figure S57: ESI-MS of DAB-PAMAM-G0-(Cipro-Bn)<sub>4</sub> (10)

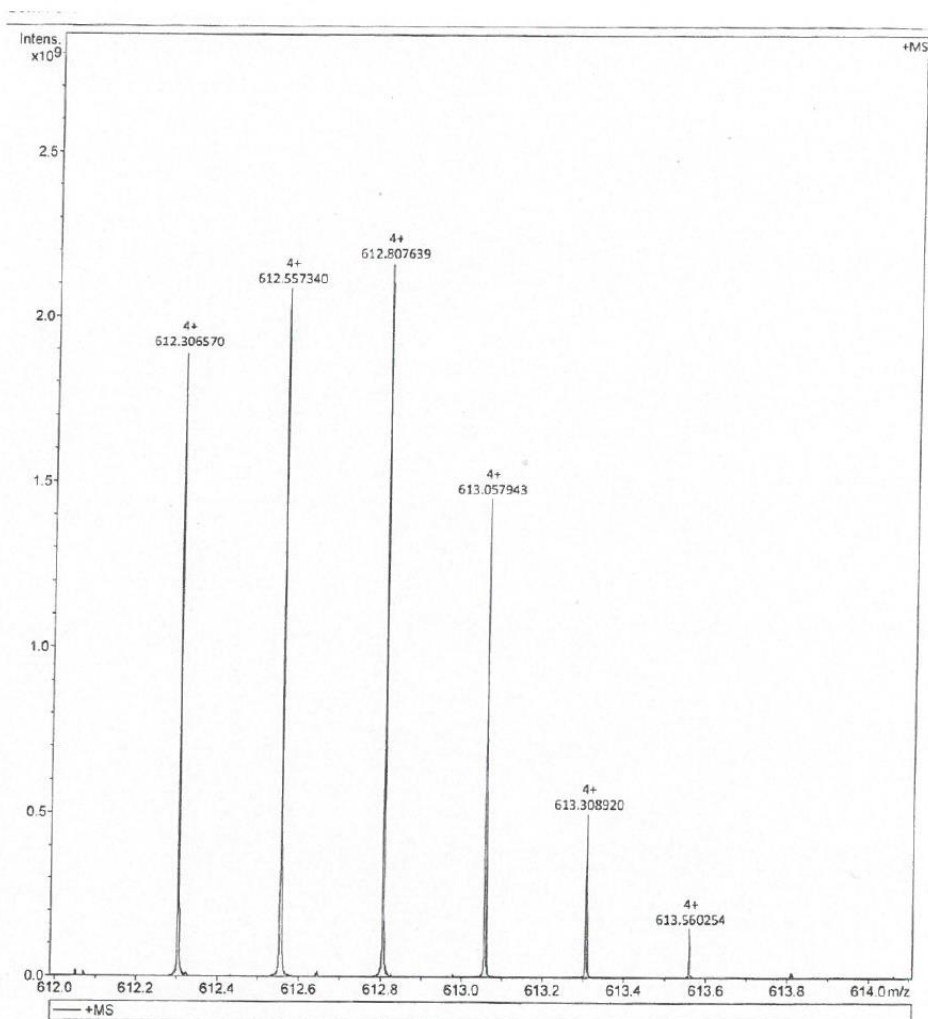

Figure SP34: Mass analysis (ESI)(MeOH+0.1%Formic acid). m/z [M+4H<sup>+</sup>]<sup>4+</sup> calcd for [C<sub>132</sub>H<sub>160</sub>F<sub>4</sub>N<sub>22</sub>O<sub>20</sub>]<sup>4+</sup>: 612.5532; Found: 612.5573

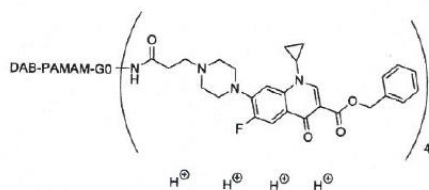

Chemical Formula: C<sub>132</sub>H<sub>160</sub>F<sub>4</sub>N<sub>22</sub>O<sub>20</sub><sup>4+</sup>

Molecular Weight: 2450.8096

m/z: 612.5532 (100.0%), 612.8040 (70.8%), 612.3023 (70.0%), 613.0549 (33.2%), 613.3057 (11.6%), 612.8024 (8.1%), 613.0533 (5.8%), 612.5516 (5.7%), 613.0542 (4.1%), 613.5565 (3.2%), 613.3051 (2.9%), 612.8034 (2.9%), 613.3041 (2.7%), 612.8048 (1.8%), 613.5559 (1.4%), 613.0556 (1.3%), 612.5539 (1.3%)
